# Supplementary material for: Iron porphyrin-catalyzed N-trifluoroethylation of anilines with 2,2,2-trifluoroethylamine hydrochloride in aqueous solution
Source: Royal Society of Chemistry journal article supplement (doi:10.1039/d1ra03379d), 2021-01-01

## *Supporting Information*

### **Iron Porphyrin-Catalyzed N-Trifluoroethylation of Anilines with 2,2,2-Trifluoroethylamine Hydrochloride in Aqueous Solution**

Shuang Ren, Guiming Xu, Yongjia Guo , Qiang Liu\*, Cancheng Guo\*

*Advanced Catalytic Engineering Research Center of the Ministry of Education, College of Chemistry and Chemical Engineering, Hunan  
University, Changsha, 410082 (P.R. China)*

### **Table of Contents**

|                                                                               |        |
|-------------------------------------------------------------------------------|--------|
| <b>1. General information</b> .....                                           | S2     |
| <b>2. Optimization of reaction conditions for N-trifluoroethylation</b> ..... | S2     |
| <b>3. ESR spectra data of FeTPP(NO)</b> .....                                 | S2     |
| <b>4. Spectra data of the Products</b> .....                                  | S3-S42 |

## 1. General information

Unless otherwise noted, all reactions were carried out in Schlenk tubes. Reagents and solvents were obtained from commercial sources and used without further purification. The  $^1\text{H}$ ,  $^{13}\text{C}$  and  $^9\text{F}$  spectra were recorded on a Bruker ADVANCE III spectrometer at 400 MHz, 100 MHz and 377 MHz, and Chemical shifts are reported in ppm using tetramethylsilane as internal standard (s = singlet, d = doublet, t = triplet, q = quartet, dd = doublet of doublets, dt = doublet of triplets m = multiplet). Column chromatography was performed using silica gel of 300-400  $\mu\text{m}$ . The electron ionization (EI) method was used for HRMS measurement, and the mass analyzer type is TOF for EI. The HRMS (EI) was recorded on an Esquire 3000 plus instrument. ESR measurements were carried out on a JEOL JES-FA-200 spectrometer at 77K or room temperature.

## 2. Optimization of reaction conditions for N-trifluoroethylation<sup>a</sup>

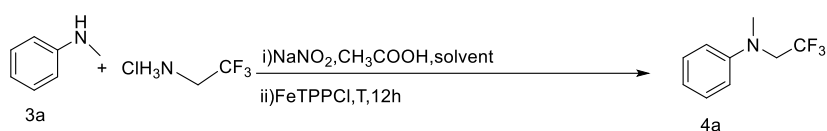

| Entry | solvent                                                    | Temperature<br>[°C] | Yield<br>[%] |
|-------|------------------------------------------------------------|---------------------|--------------|
| 1     | $\text{H}_2\text{O}:\text{CH}_2\text{Cl}_2=1:1$            | r.t                 | 30           |
| 2     | $\text{H}_2\text{O}:\text{CH}_2\text{ClCH}_2\text{Cl}=1:1$ | 40°C                | 46           |
| 3     | $\text{H}_2\text{O}:\text{CH}_2\text{ClCH}_2\text{Cl}=1:1$ | 60°C                | 63           |
| 4     | $\text{H}_2\text{O}:\text{CH}_2\text{ClCH}_2\text{Cl}=1:1$ | 80°C                | 72           |

<sup>a</sup>Reaction conditions: **3a** (0.3 mmol, 1.0 equiv.), trifluoroethylamine hydrochloride (0.6 mmol, 2 equiv.), FeTPPCL (0.9 mol %),  $\text{NaNO}_2$  (0.6 mmol, 2 equiv.),  $\text{CH}_3\text{COOH}$  (0.6 mmol, 2 equiv.), solvent (4 mL), air atmosphere, 12 h

## 3. ESR spectra data of FeTPP(NO)

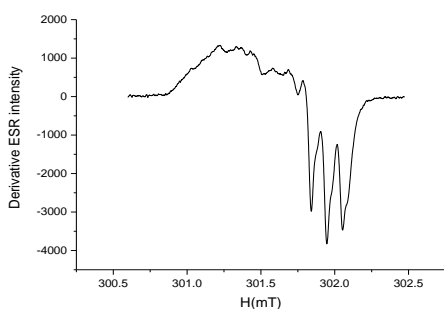

Fig.1 ESR spectrum of [FeTPP(NO)] in DMSO at 77K

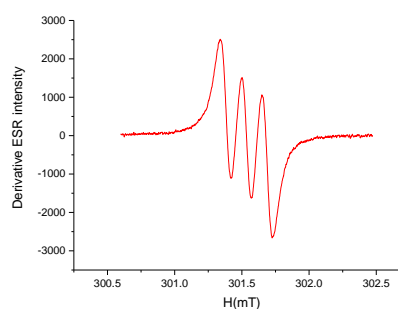

Fig.2 ESR spectrum of [FeTPP(NO)] in DMSO at room temperature

## 4. Spectra data of the products

**2-Methyl-N-(2,2,2-trifluoroethyl)benzenamine(2a)** pale yellow liquid, 42.1 mg, 74% yield.  $^1\text{H}$  NMR (400 MHz,  $\text{CDCl}_3$ ):  $\delta$  7.07 (t,  $J=7.7$  Hz, 1H), 7.01 (d,  $J=7.3$  Hz, 1H), 6.67 (t,  $J=7.4$  Hz, 1H), 6.61 (d,  $J=8.1$  Hz, 1H), 3.73 (q,  $J=8.9$  Hz, 2H), 2.10 (s, 3H).  $^{13}\text{C}$  NMR (100 MHz,  $\text{CDCl}_3$ ):  $\delta$  143.2, 129.6, 126.2, 124.1 (q,  $J=278.0$  Hz), 121.5, 117.7, 109.2, 44.9 (q,  $J=33.0$  Hz), 16.3.  $^{19}\text{F}$  NMR (377 MHz,  $\text{CDCl}_3$ ):  $\delta$  -72.20 (t,  $J=8.7$  Hz). HRMS (EI): calcd for  $\text{C}_9\text{H}_{10}\text{F}_3\text{N}$ : 189.0765; found: 189.0768

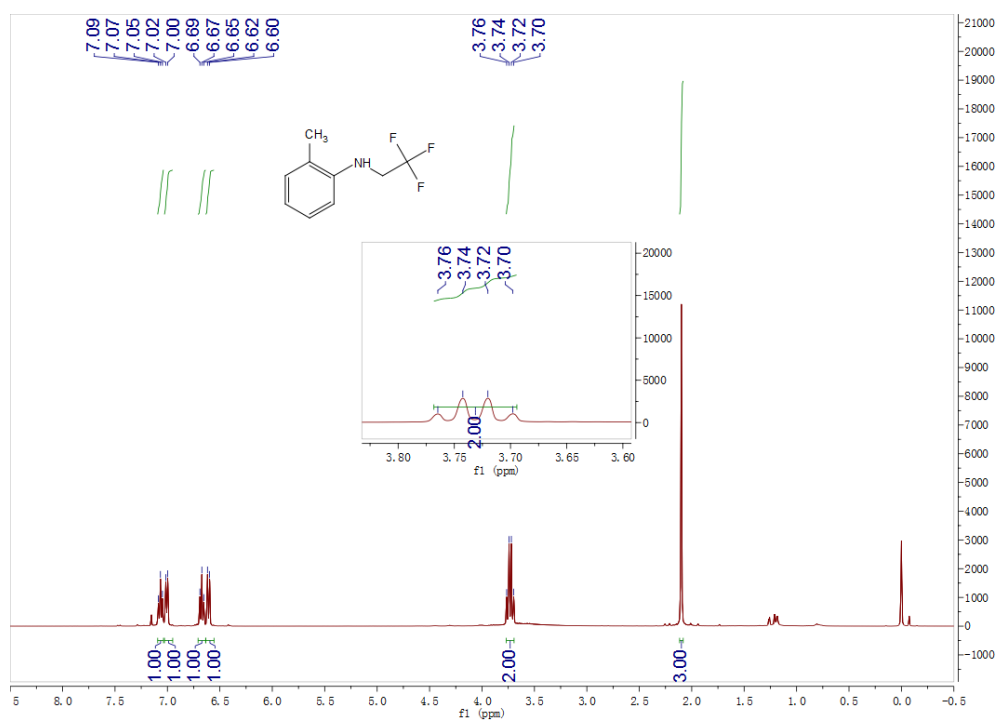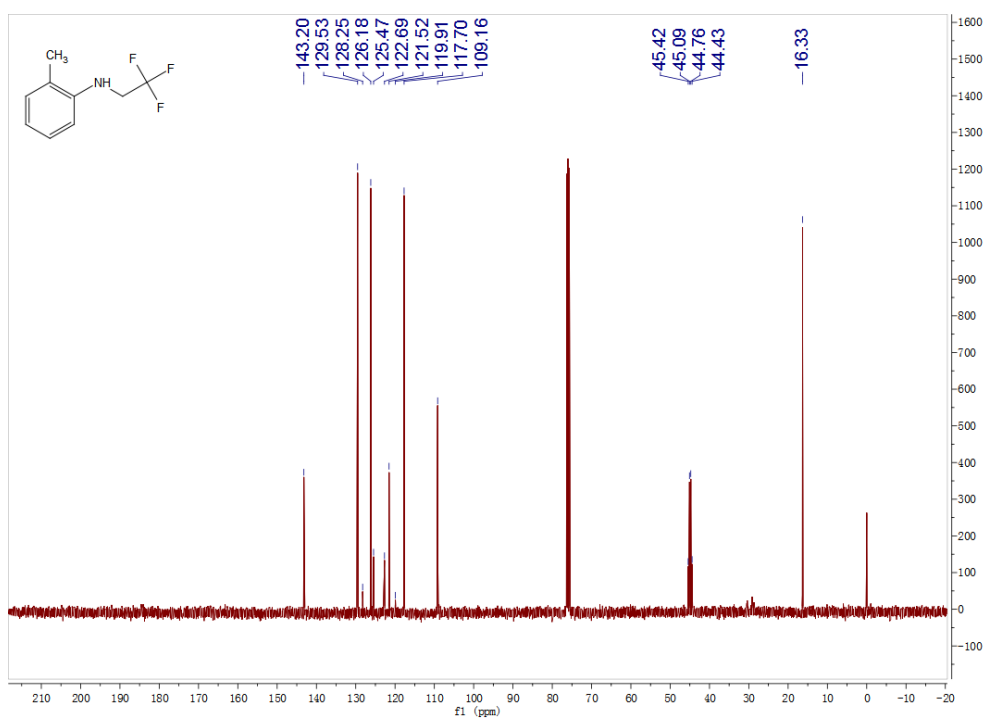

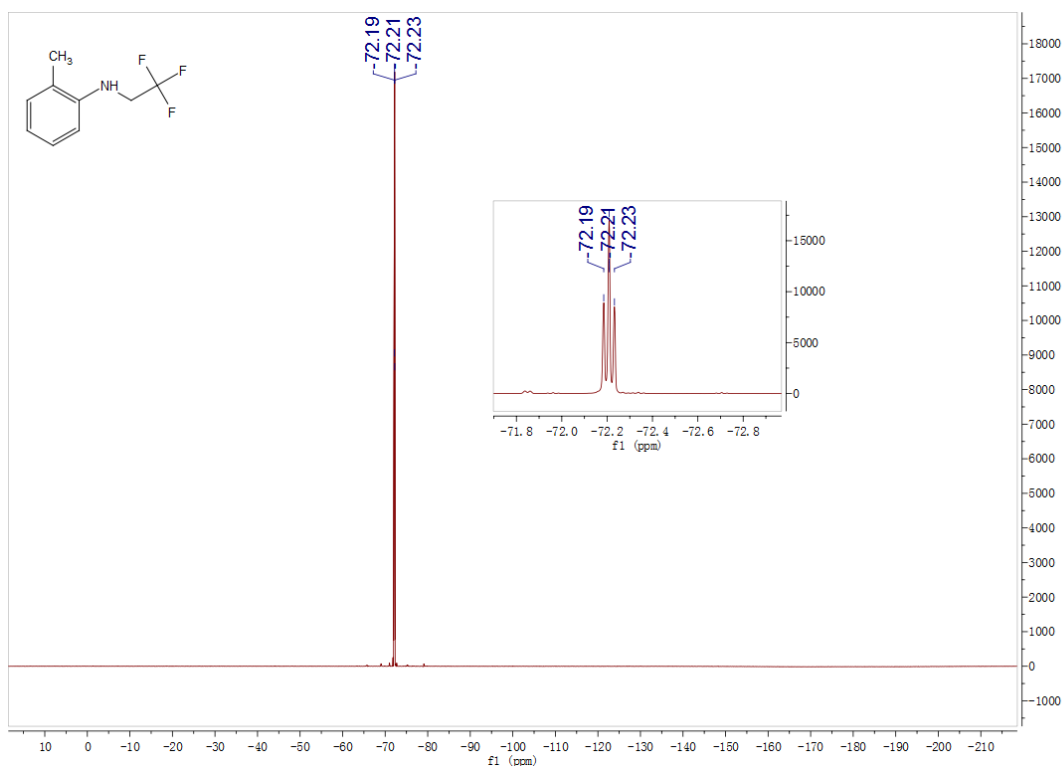

**3-Methyl-N-(2,2,2-trifluoroethyl)benzenamine (2b)** pale yellow liquid, 40.9 mg, 72% yield. <sup>1</sup>H NMR (400 MHz, CDCl<sub>3</sub>) δ 7.03 (t, *J* = 7.8 Hz, 1H), 6.56 (d, *J* = 7.5 Hz, 1H), 6.43 (d, *J* = 7.2 Hz, 2H), 3.69 (t, *J* = 9.0 Hz, 2H), 2.22 (s, 3H). <sup>13</sup>C NMR (100 MHz, CDCl<sub>3</sub>) δ = 145.2, 138.3, 128.3, 124.1 (q, *J* = 278.0 Hz), 119.0, 112.9, 109.2, 45.0 (q, *J* = 33.0 Hz), 20.5. <sup>19</sup>F NMR (377 MHz, CDCl<sub>3</sub>) δ -72.35 (t, *J* = 8.9 Hz). HRMS (EI): calcd for C<sub>9</sub>H<sub>10</sub> F<sub>3</sub>N: 189.0765; found: 189.0771

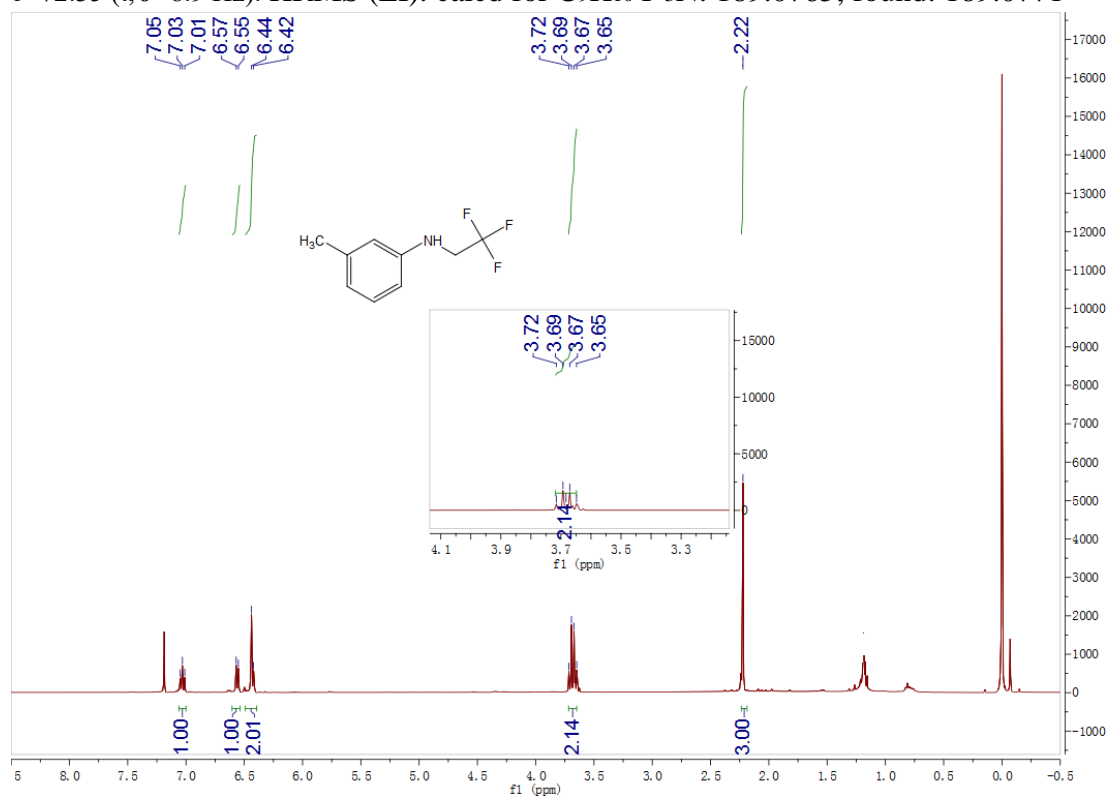

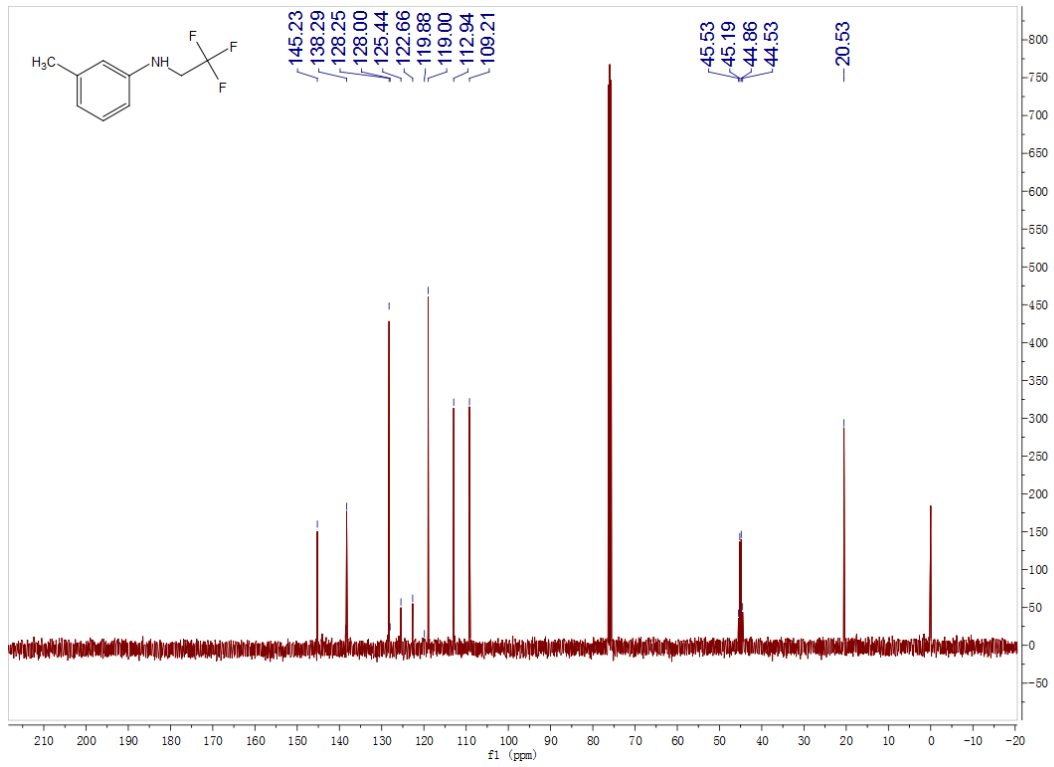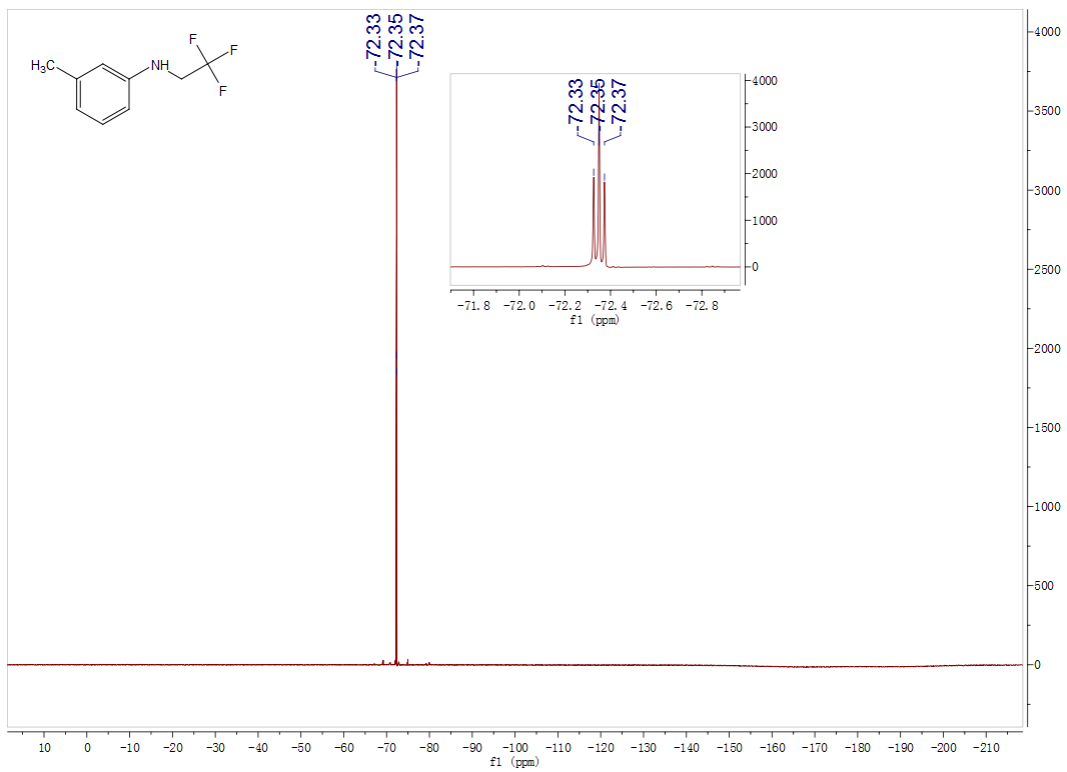

**4-Methyl-N-(2,2,2-trifluoroethyl)benzenamine(2c)** pale yellow liquid, 40.7 mg, 71% yield.  $^1\text{H NMR}$  (400 MHz,  $\text{CDCl}_3$ )  $\delta$  7.06-6.89 (m, 2H), 6.65 (d,  $J=8.1$  Hz, 1H), 3.83 (q,  $J=8.9$  Hz, 2H), 2.29 (s, 3H), 2.20 (s, 3H).  $^{13}\text{C NMR}$  (100 MHz,  $\text{CDCl}_3$ )  $\delta=141.9$ , 131.4, 128.0, 127.5, 125.2 (q,  $J=278.0$  Hz), 122.7, 110.6, 46.3 (q,  $J=33.0$  Hz), 20.3, 17.3.  $^{19}\text{F NMR}$  (377 MHz,  $\text{CDCl}_3$ )  $\delta$ -72.24 (t,  $J=8.9\text{Hz}$ ). HRMS (EI): calcd for  $\text{C}_9\text{H}_{10}\text{F}_3\text{N}$ : 189.0765; found: 189.0759

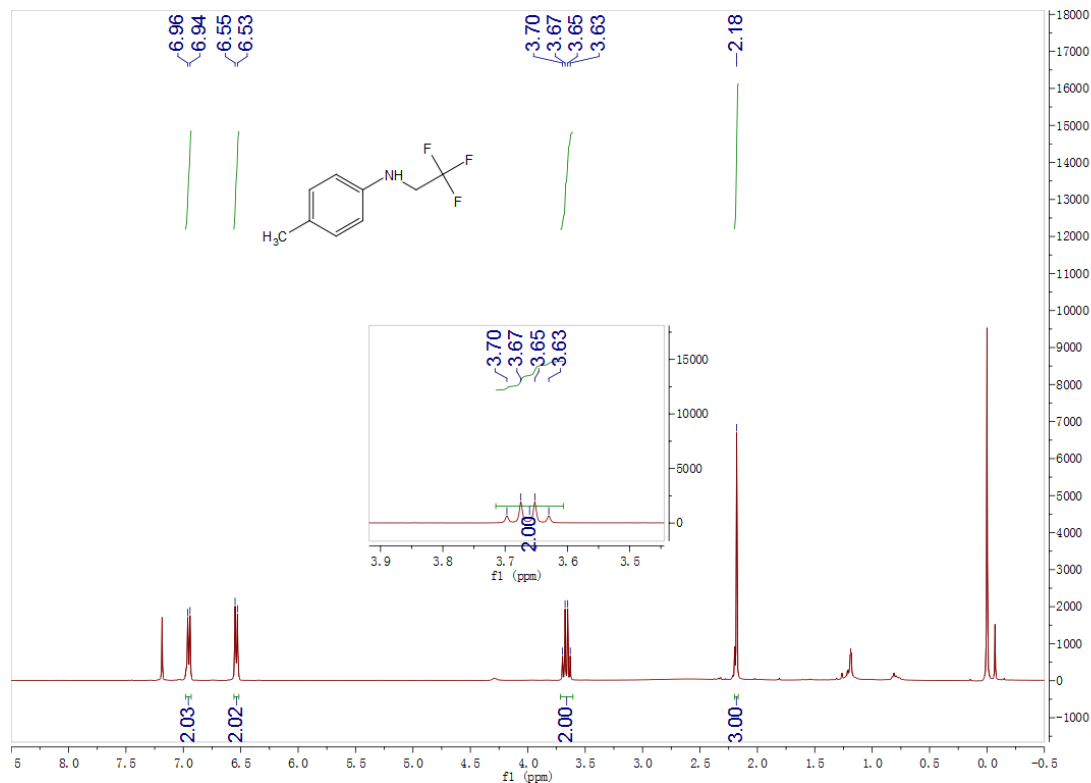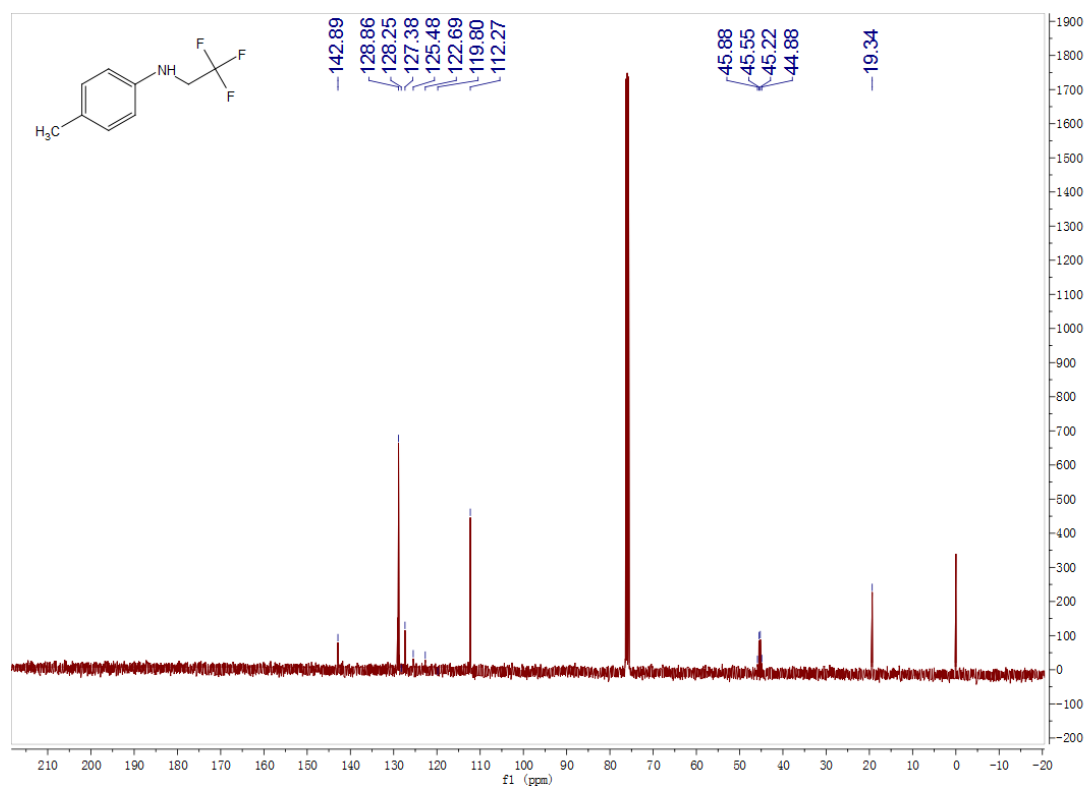

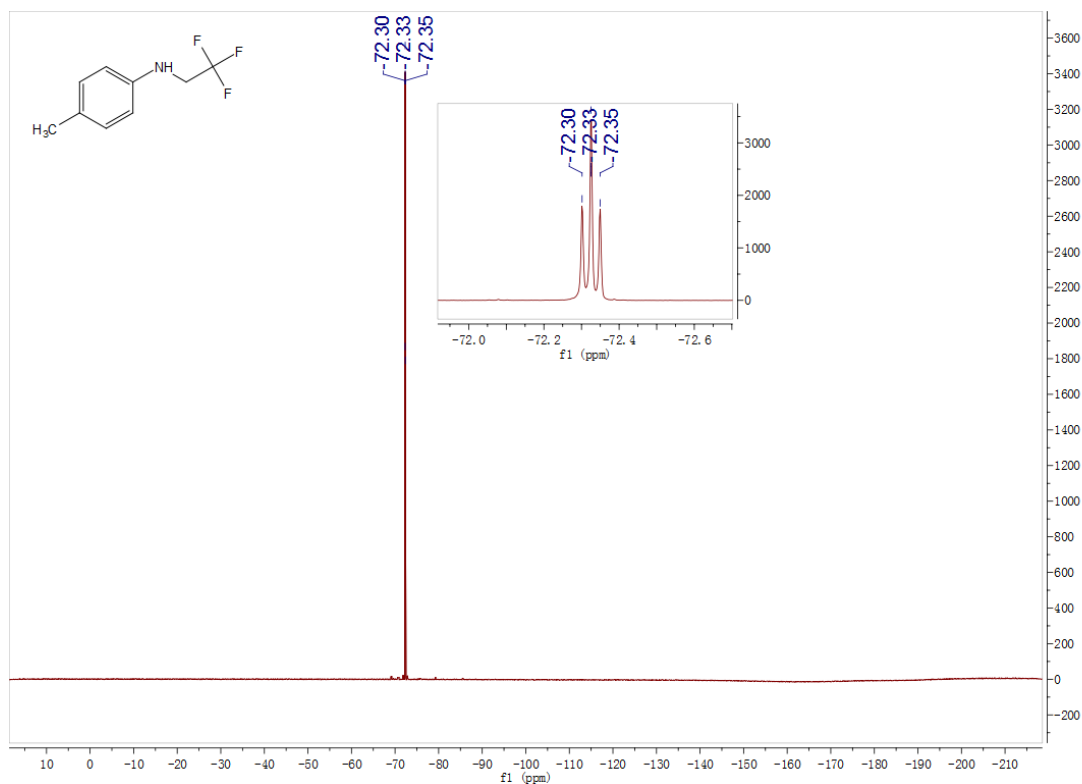

**2-Methoxy-N-(2,2,2-trifluoroethyl)benzenamine(2d)** pale yellow liquid, 42.5 mg, 69% yield.  $^1\text{H}$  NMR (400 MHz,  $\text{CDCl}_3$ )  $\delta$  6.80 (t,  $J=7.5$  Hz, 1H), 6.69 (dt,  $J=15.1$ , 7.6 Hz, 2H), 6.60 (d,  $J=7.8$  Hz, 1H), 3.76 (s, 3H), 3.67 (q,  $J=9.1$  Hz, 2H).  $^{13}\text{C}$  NMR (100 MHz,  $\text{CDCl}_3$ )  $\delta=145.9$ , 135.3, 124.1(q,  $J=278.0$  Hz), 120.2, 117.2, 109.1, 108.9, 54.8, 44.7 (q,  $J=34.0$  Hz).  $^{19}\text{F}$  NMR (377 MHz,  $\text{CDCl}_3$ )  $\delta$ -72.29 (t,  $J=9.0$  Hz). HRMS (EI): calcd for  $\text{C}_9\text{H}_{10}\text{F}_3\text{NO}$ : 205.0714; found: 205.0711

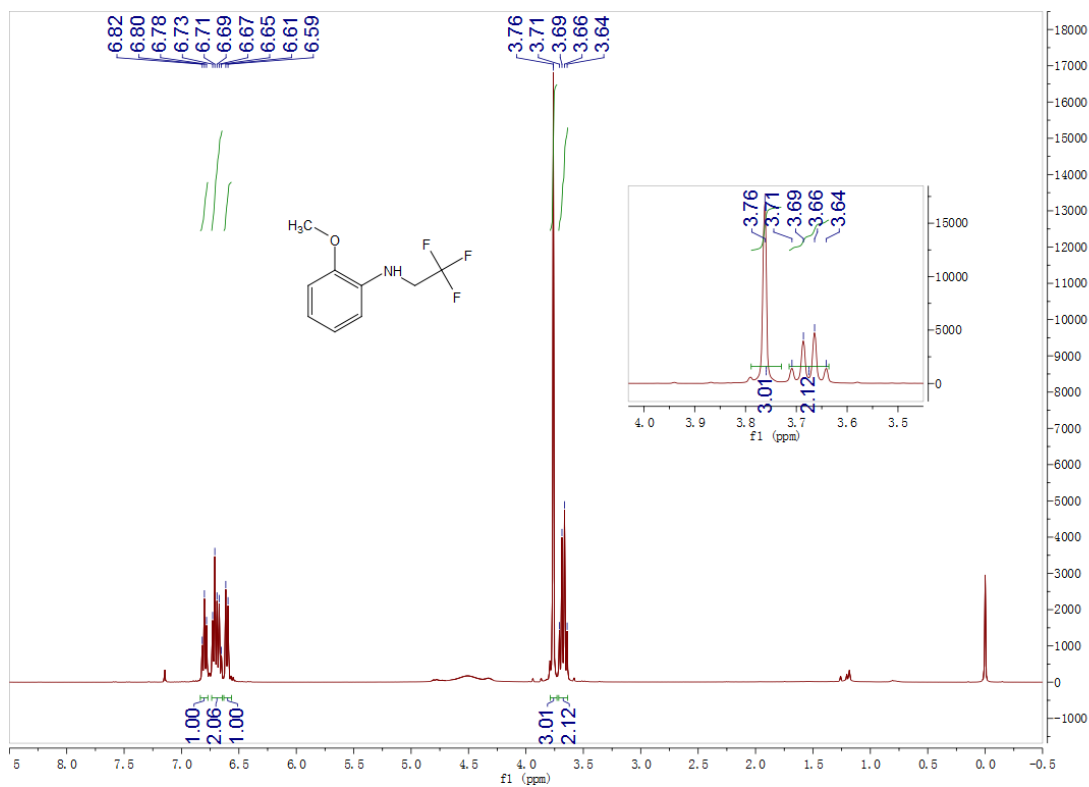

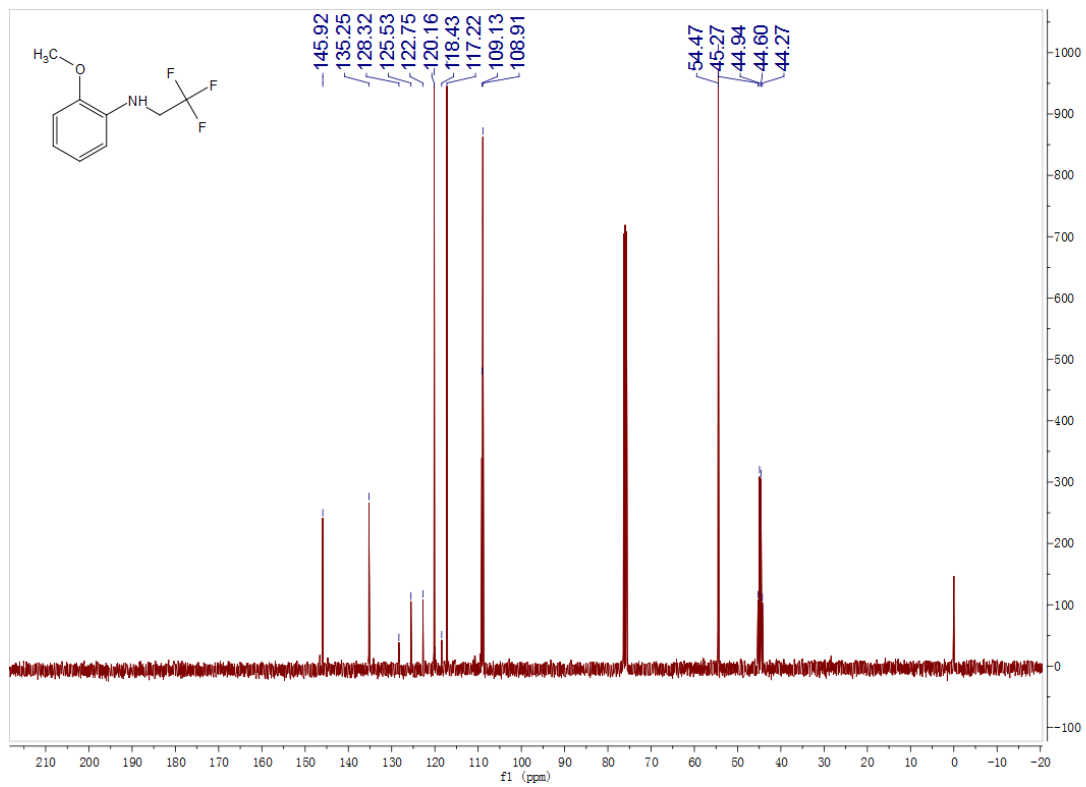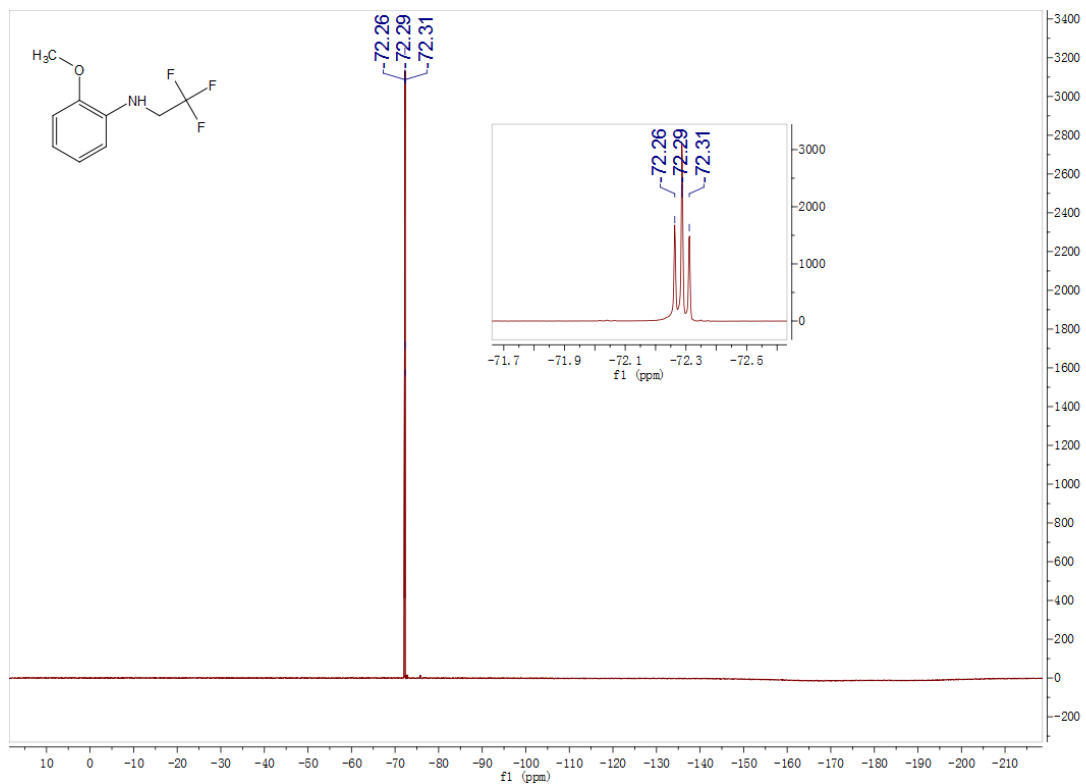



**3-Methoxy-N-(2,2,2-trifluoroethyl)benzenamine(2e)** pale yellow liquid, 38.2 mg, 62% yield.  $^1\text{H}$  NMR (400 MHz,  $\text{CDCl}_3$ )  $\delta$  7.04 (t,  $J=8.1$  Hz, 1H), 6.29 (d,  $J=8.2$  Hz, 1H), 6.21 (d,  $J=8.1$  Hz, 1H), 6.15 (s, 1H), 3.69-3.61 (m, 5H).  $^{13}\text{C}$  NMR (100 MHz,  $\text{CDCl}_3$ )  $\delta$  =160.9, 147.7, 130.3, 125.0 (q,  $J=278.0$  Hz), 106.1, 104.1, 99.5, 55.2, 46.0 (q,  $J=33.0$  Hz).  $^{19}\text{F}$  NMR (377 MHz,  $\text{CDCl}_3$ )  $\delta$ -72.31 (t,  $J=8.9$  Hz). HRMS (EI): calcd for  $\text{C}_9\text{H}_{10}\text{F}_3\text{NO}$ : 205.0714; found: 205.0716

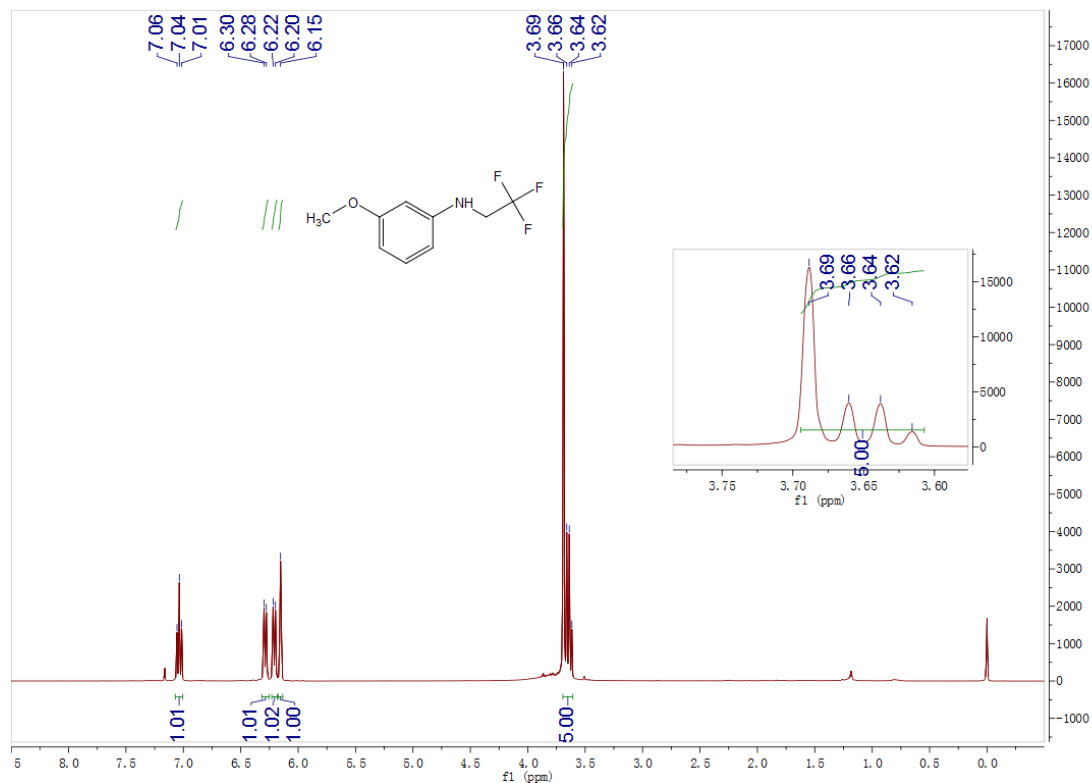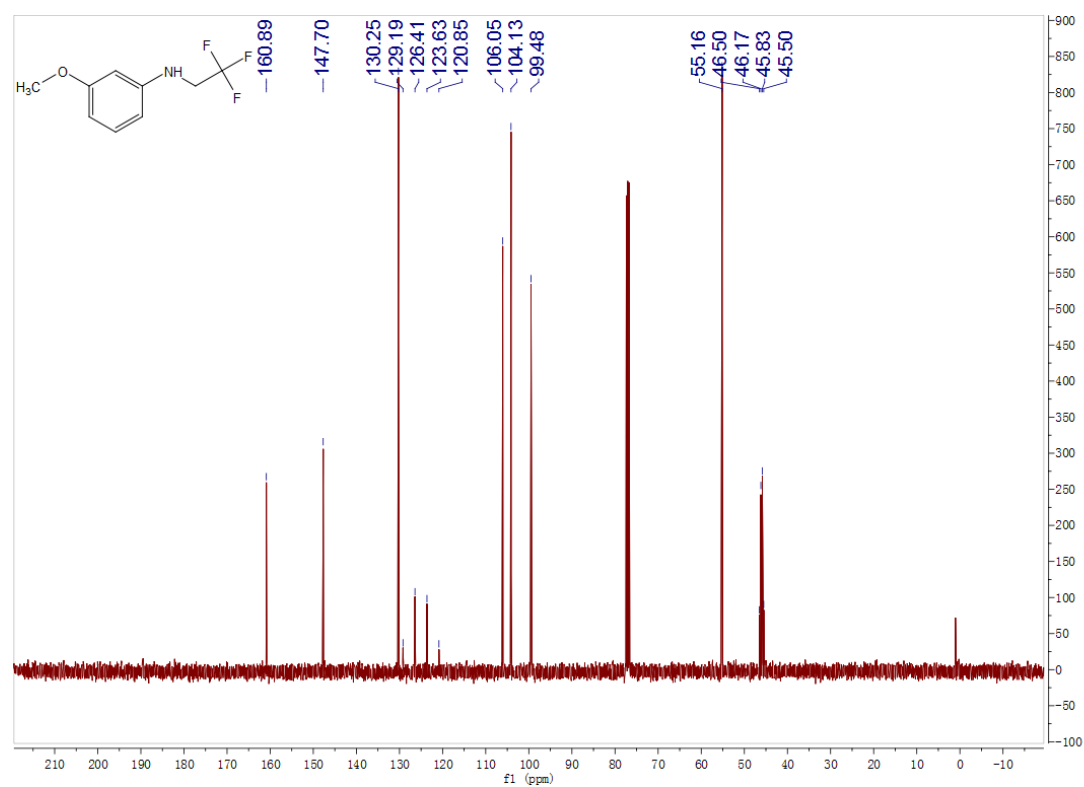

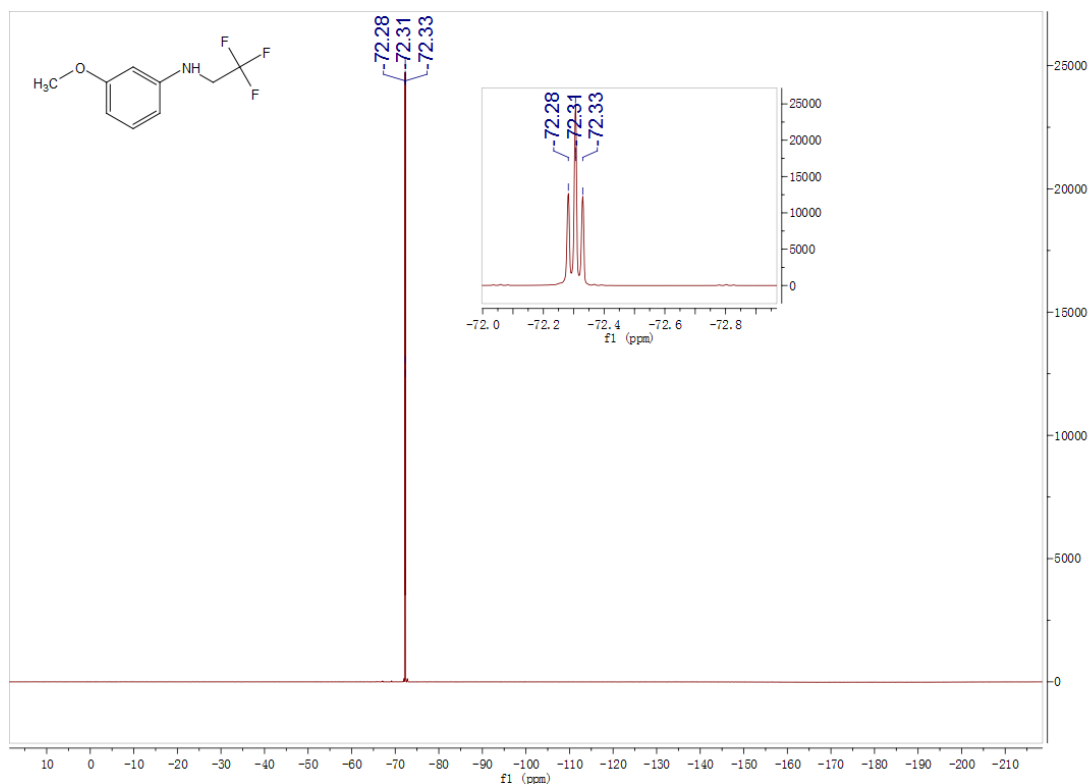

**4-Methoxy-N-(2,2,2-trifluoroethyl)benzenamine(2f)** pale yellow liquid, 44.9 mg, 73% yield.  $^1\text{H}$  NMR (400 MHz,  $\text{CDCl}_3$ )  $\delta$  6.73 (d,  $J=8.8$  Hz, 2H), 6.58 (d,  $J=8.8$  Hz, 2H), 3.68 (s, 3H), 3.63 (q,  $J=9.0$  Hz, 2H).  $^{13}\text{C}$  NMR (100 MHz,  $\text{CDCl}_3$ )  $\delta$  152.2, 139.2, 124.1 (q,  $J=278.0$  Hz), 113.9, 113.7, 54.7, 46.2 (q,  $J=33.0$  Hz).  $^{19}\text{F}$  NMR (377 MHz,  $\text{CDCl}_3$ )  $\delta$  -72.32 (t,  $J=9.0$  Hz). HRMS (EI): calcd for  $\text{C}_9\text{H}_{10}\text{F}_3\text{NO}$ : 205.0714; found: 205.0718

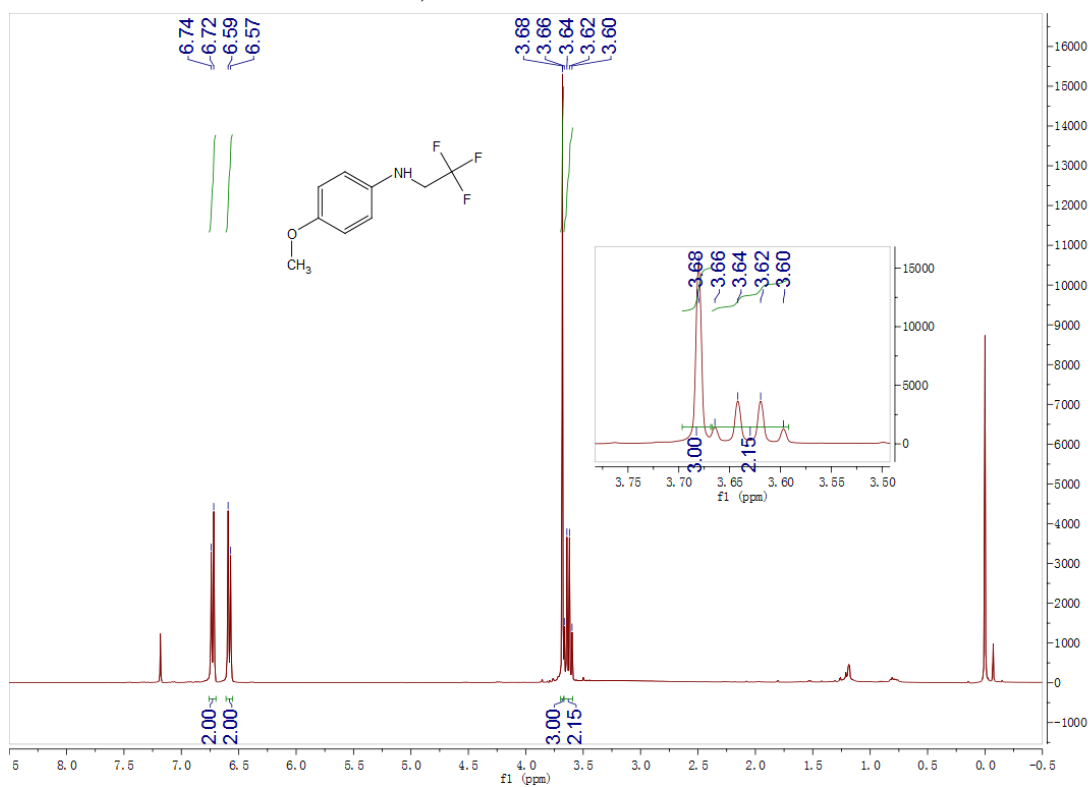

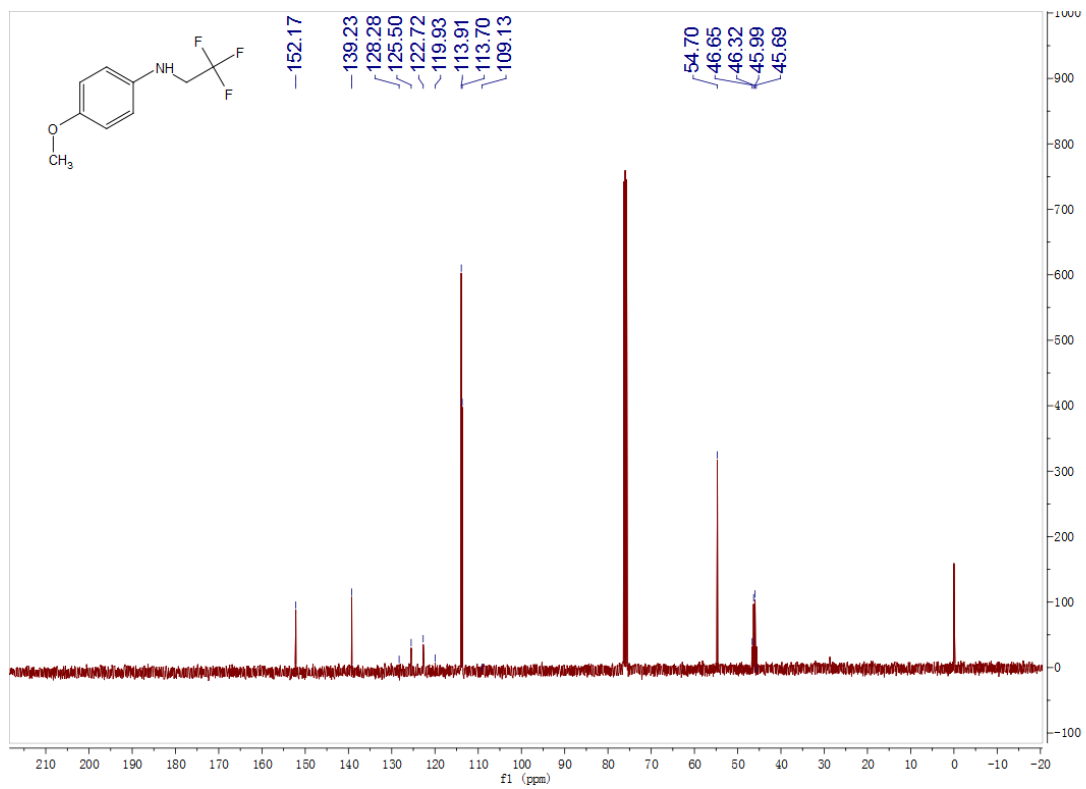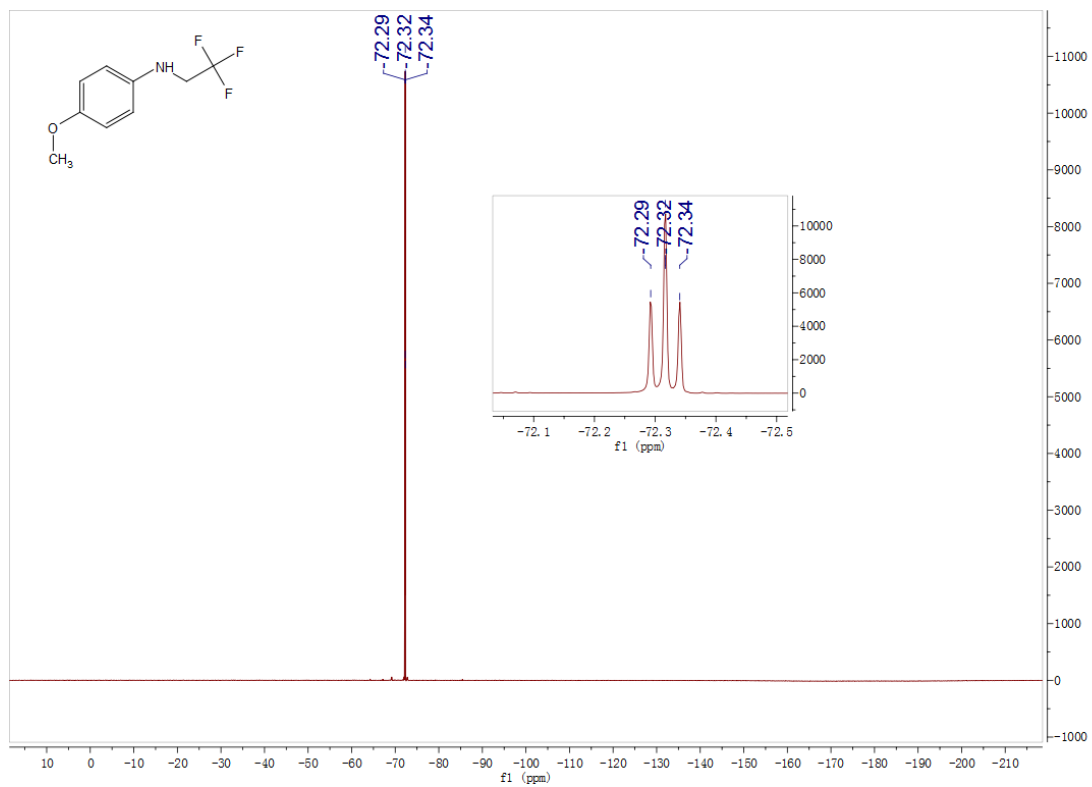

**4-(1-Methylethyl)-N-(2,2,2-trifluoroethyl)benzenamine(2g)** pale yellow liquid, 48.2 mg, 74% yield.  $^1\text{H}$  NMR (400 MHz,  $\text{CDCl}_3$ )  $\delta$  7.01 (d,  $J=8.4$  Hz, 2H), 6.56 (d,  $J=8.3$  Hz, 2H), 3.66 (q,  $J=9.0$  Hz, 2H), 2.75 (dt,  $J=13.8, 6.9$  Hz, 1H), 1.14 (d,  $J=6.9$  Hz, 6H).  $^{13}\text{C}$  NMR (100 MHz,  $\text{CDCl}_3$ )  $\delta$  143.2, 138.7, 126.3, 124.1 (q,  $J=278.0$  Hz) 112.2, 45.4 (q,  $J=33.0$  Hz), 32.2, 23.2.  $^{19}\text{F}$  NMR (377 MHz,  $\text{CDCl}_3$ )  $\delta$ -72.35 (t,  $J=9.0$  Hz). HRMS (EI): calcd for  $\text{C}_{11}\text{H}_{14}\text{F}_3\text{N}$ : 217.1078; found: 217.1085

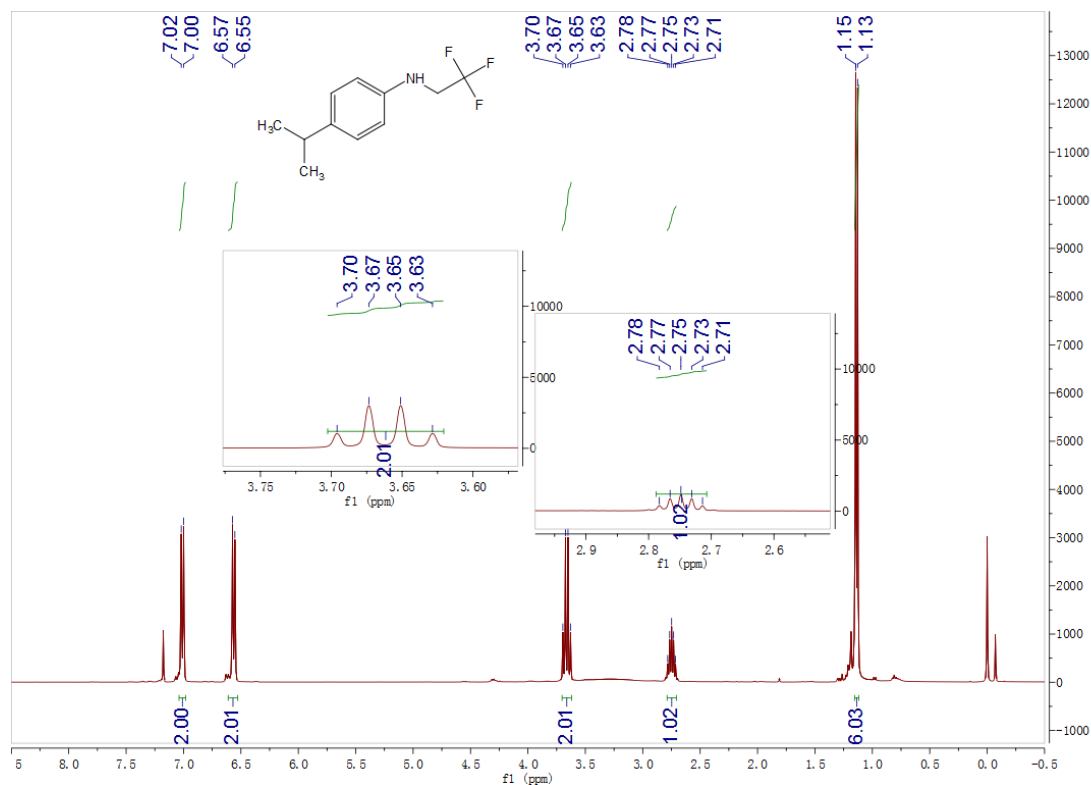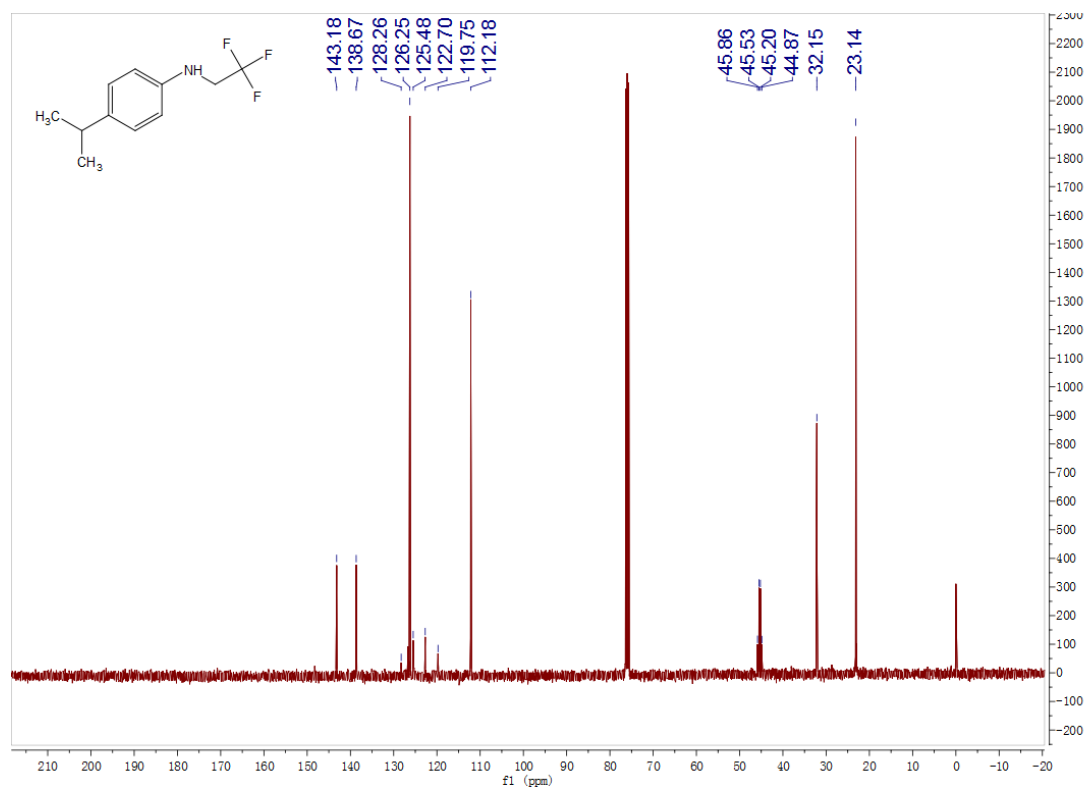

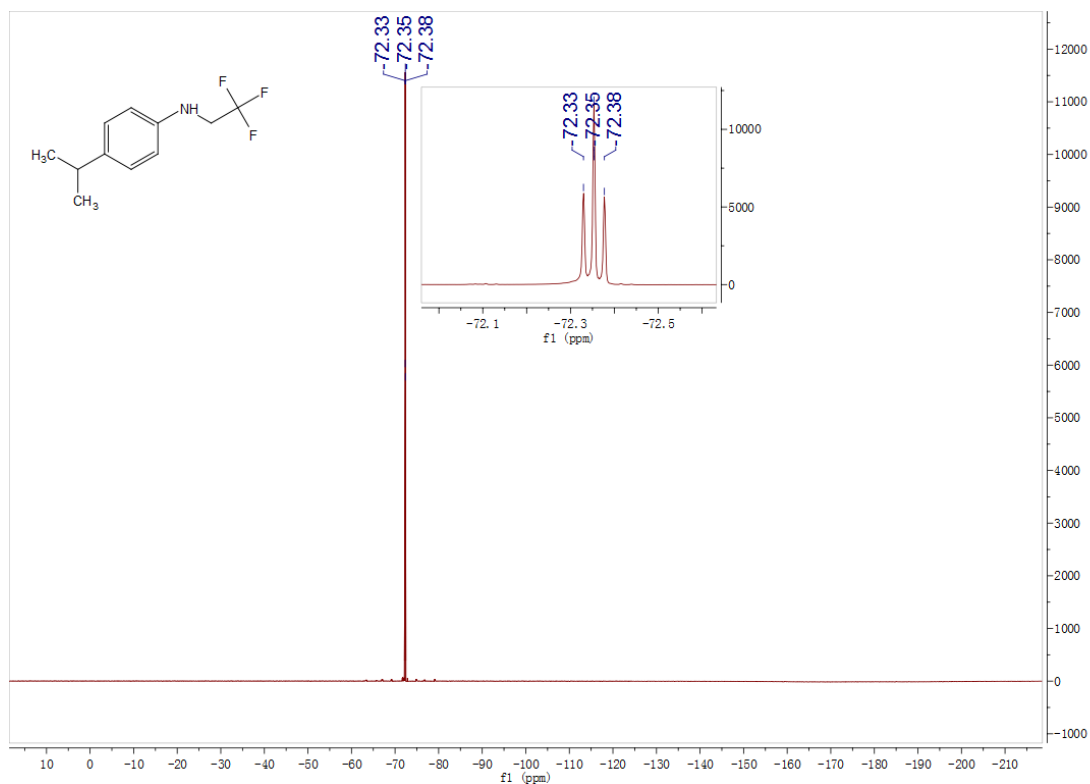

**2,4-dimethyl-N-(2,2,2-trifluoroethyl)benzenamine(2h)** pale yellow liquid, 53.0 mg, 87% yield.  $^1\text{H}$  NMR (400 MHz,  $\text{CDCl}_3$ )  $\delta$  7.06-6.89 (m, 2H), 6.65 (d,  $J=8.1$  Hz, 1H), 3.83 (q,  $J=8.9$  Hz, 2H), 2.29 (s, 3H), 2.20 (s, 3H).  $^{13}\text{C}$  NMR (100 MHz,  $\text{CDCl}_3$ )  $\delta=141.9, 131.4, 128.0, 127.5, 125.2$  (q,  $J=278.0$  Hz), 122.7, 110.6, 46.3 (q,  $J=33.0$  Hz), 20.3, 17.3  $^{19}\text{F}$  NMR (377 MHz,  $\text{CDCl}_3$ )  $\delta$ -72.24 (t,  $J=8.9$  Hz). HRMS (EI): calcd for  $\text{C}_{10}\text{H}_{12}\text{F}_3\text{N}$ : 203.0922; found: 203.0927

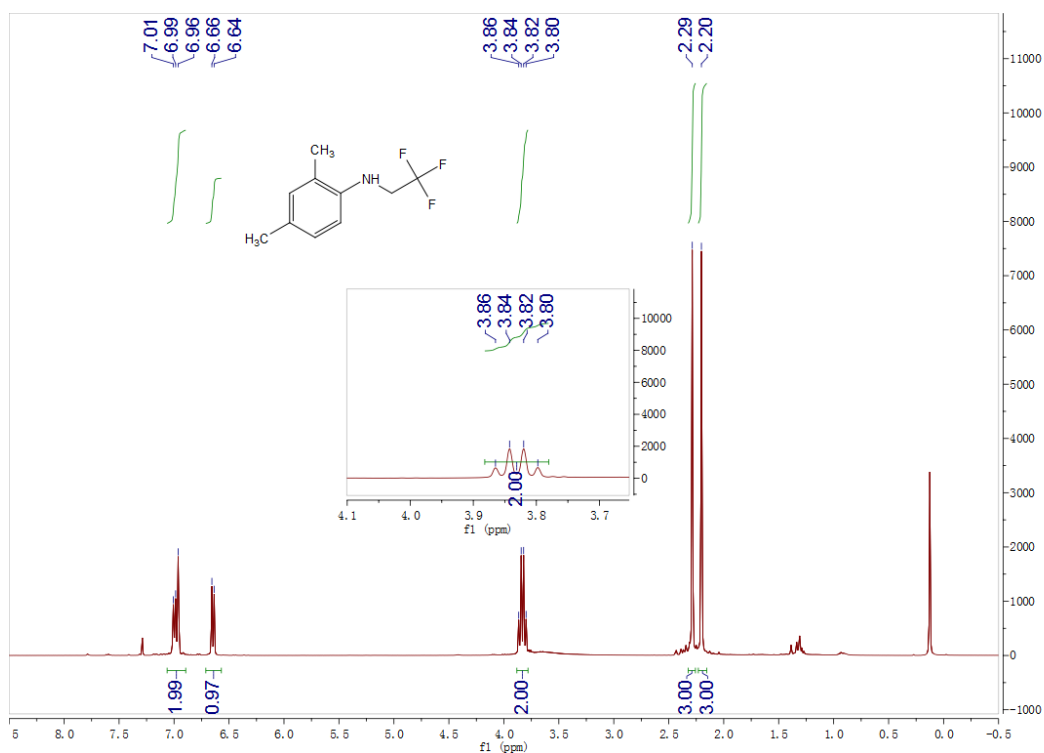

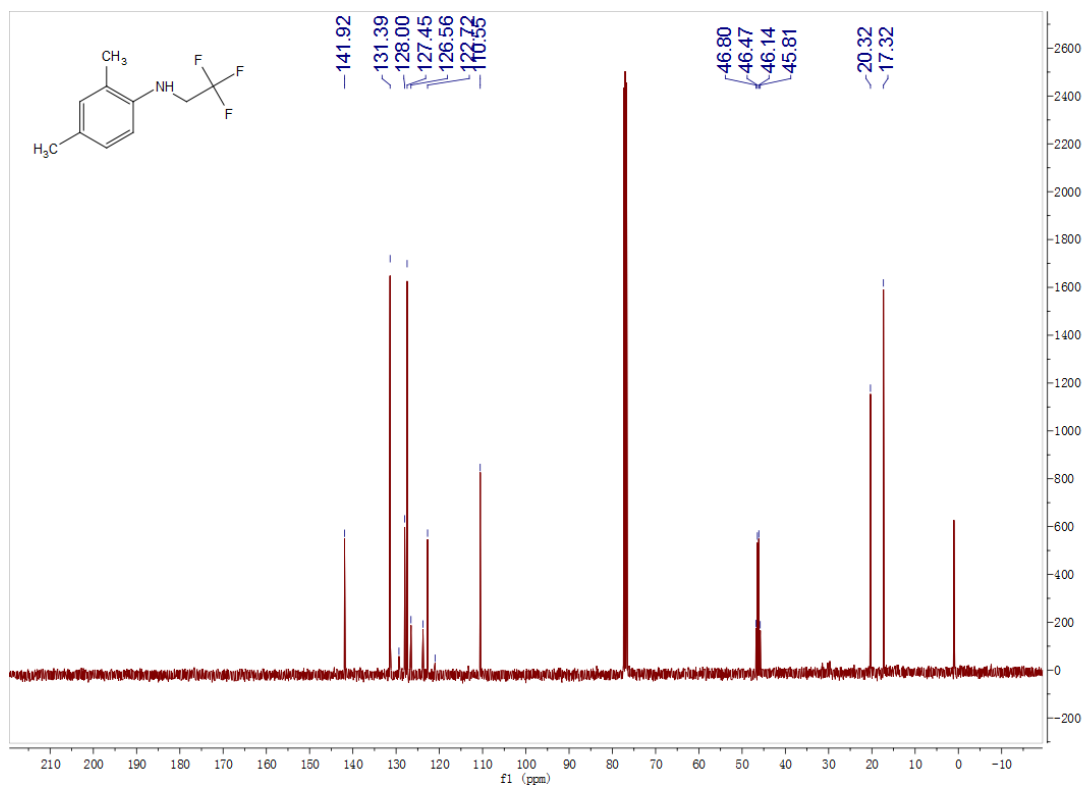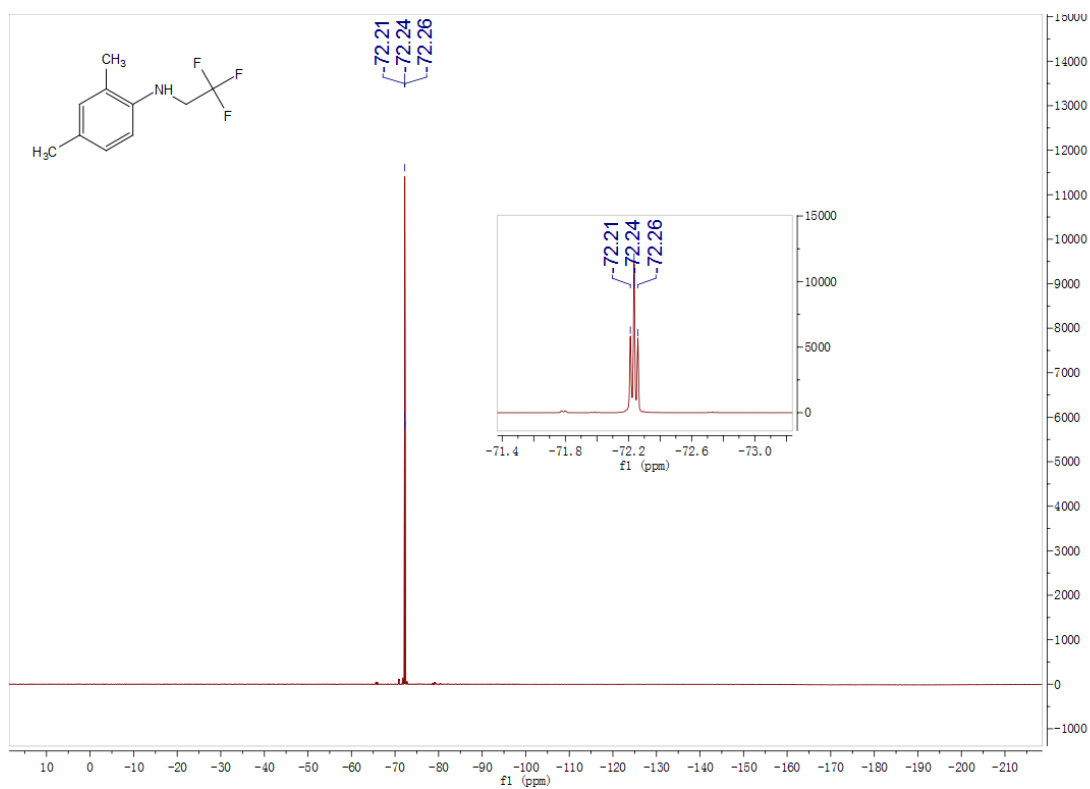

**4-methoxy-2-methyl-N-(2,2,2-trifluoroethyl)benzenamine(2i)**, pale yellow liquid, 61.2 mg, 93% yield.  $^1\text{H}$  NMR (400 MHz,  $\text{CDCl}_3$ )  $\delta$  7.39 (d,  $J=8.5$  Hz, 2H), 6.40 (d,  $J=8.5$  Hz, 2H), 3.91 (s, 1H), 3.66 (q,  $J=8.8$  Hz, 2H).  $^{13}\text{C}$  NMR (100 MHz,  $\text{CDCl}_3$ )  $\delta=151.8$ , 137.3, 124.2 (q,  $J=278.0$  Hz), 123.7, 116.0, 111.1, 110.7, 54.6, 45.9 (q,  $J=32.0$  Hz).  $^{19}\text{F}$  NMR (377 MHz,  $\text{CDCl}_3$ )  $\delta=72.20$  (t,  $J=8.9$  Hz). HRMS (EI): calcd for  $\text{C}_{10}\text{H}_{12}\text{F}_3\text{NO}$ : 219.0871; found: 219.0877

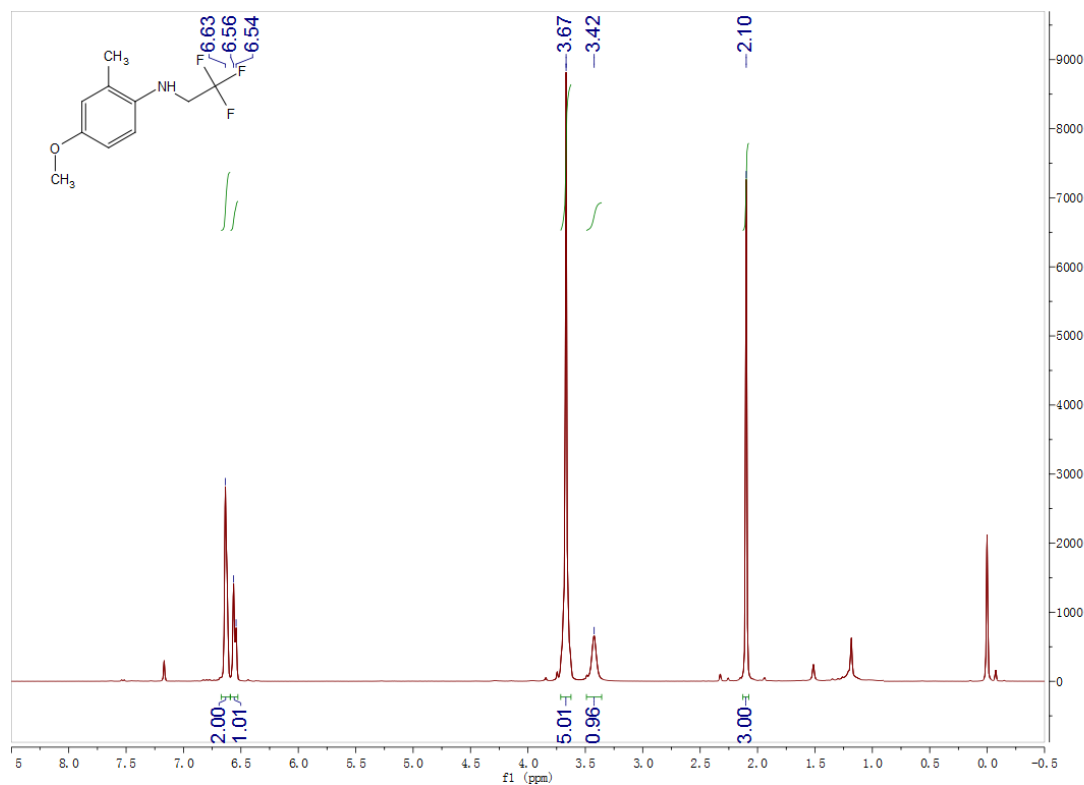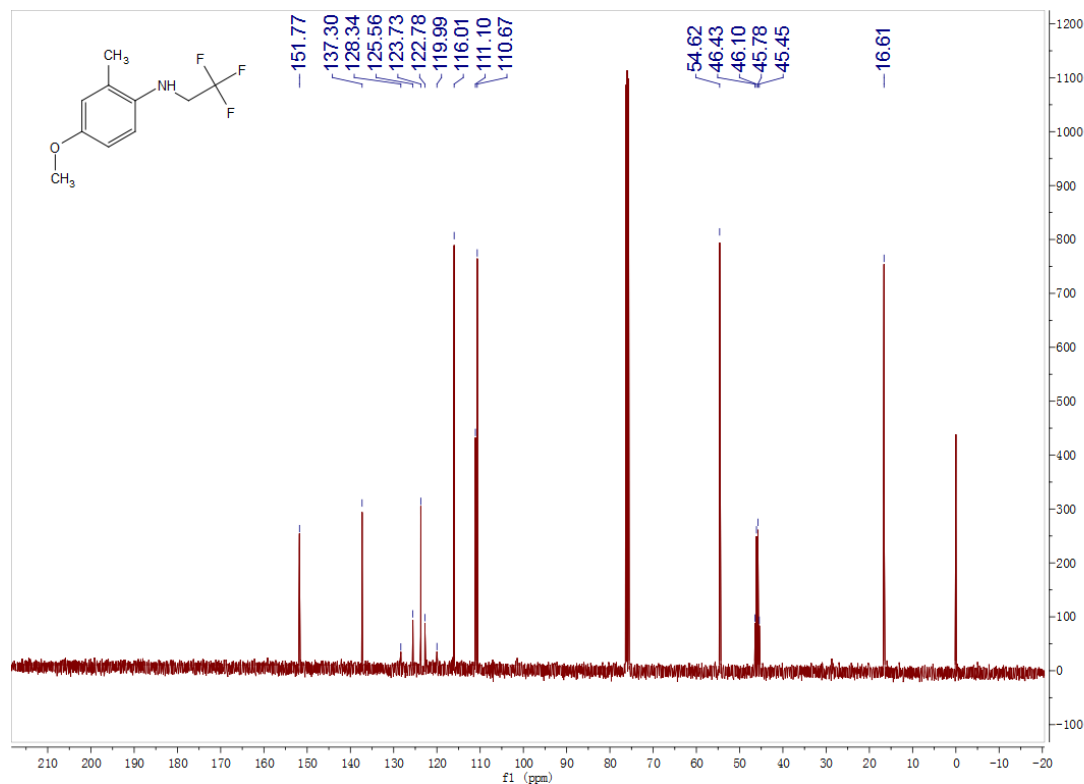

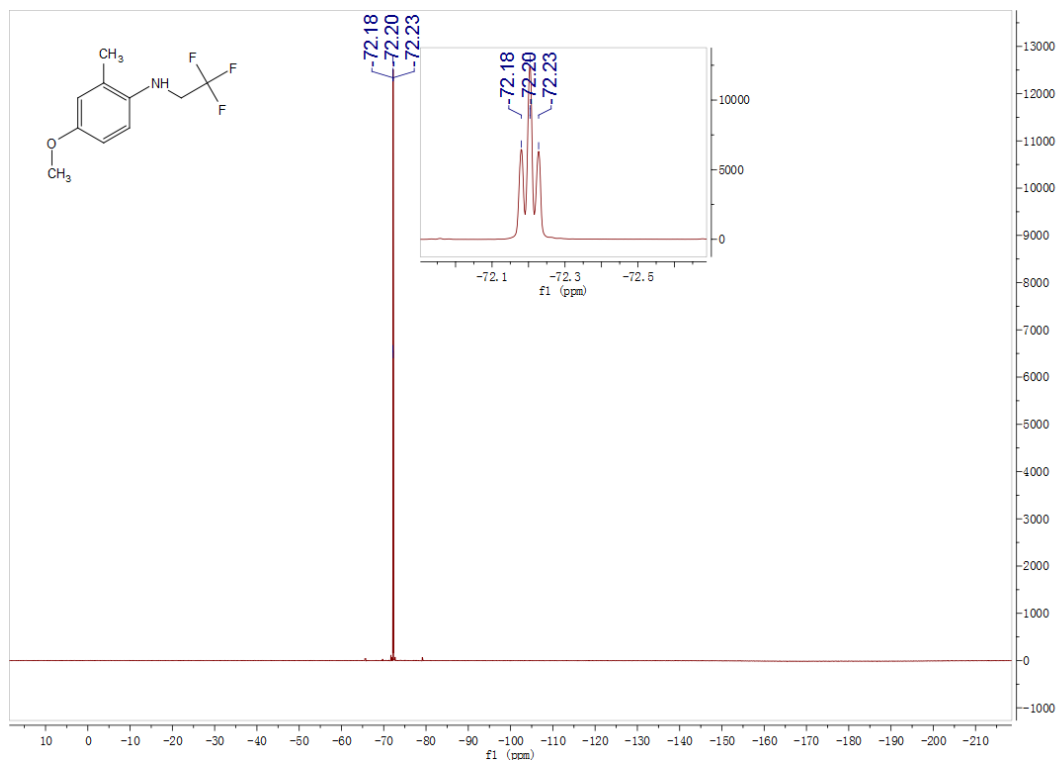

**2,4-dimethoxy-N-(2,2,2-trifluoroethyl)benzamide(2j)**, pale yellow liquid, 57.9mg, 82% yield.  $^1\text{H}$  NMR (400 MHz,  $\text{CDCl}_3$ )  $\delta$  6.64 (d,  $J=8.5$  Hz, 1H), 6.50 (s, 1H), 6.45 (d,  $J=8.6$  Hz, 1H), 3.86 (s, 3H), 3.82 (s, 1H), 3.79 (s, 3H), 3.78-3.70 (m, 2H).  $^{13}\text{C}$  NMR (100 MHz,  $\text{CDCl}_3$ )  $\delta=153.0$ , 148.1, 130.5, 125.3 (q,  $J=278.0$  Hz), 111.0, 103.8, 99.4, 55.7, 55.6, 46.7 (q,  $J=33.0$  Hz).  $^{19}\text{F}$  NMR (377 MHz,  $\text{CDCl}_3$ )  $\delta$ -72.28 (t,  $J=9.0$  Hz). HRMS (EI): calcd for  $\text{C}_{10}\text{H}_{12}\text{F}_3\text{NO}_2$ : 235.0820; found: 219.0814

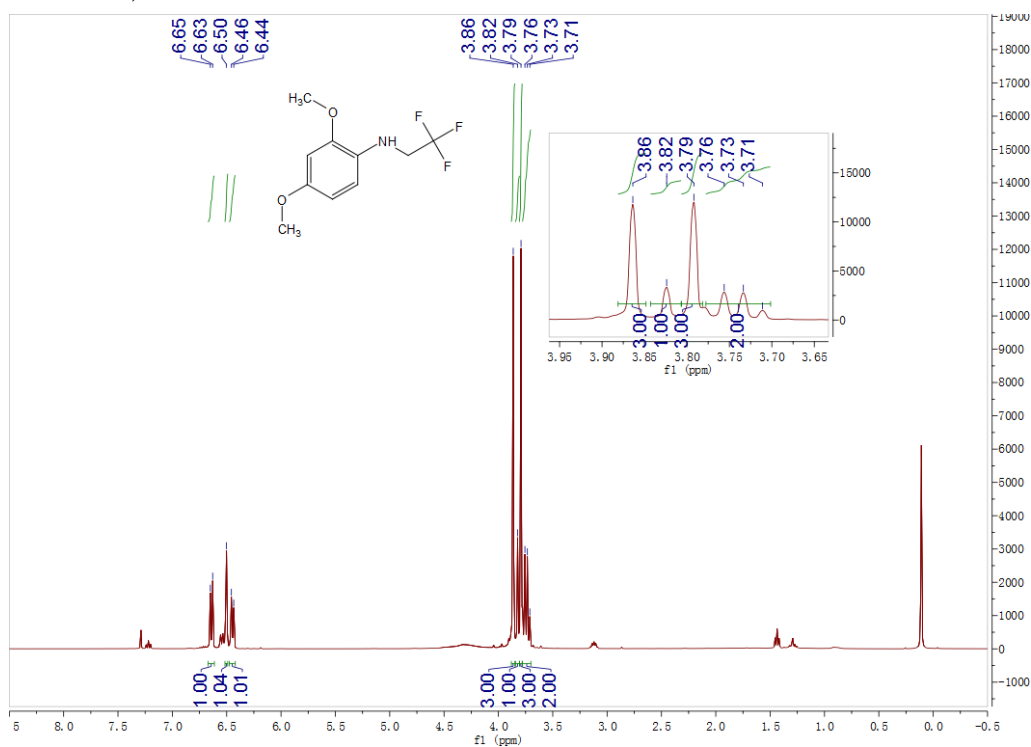



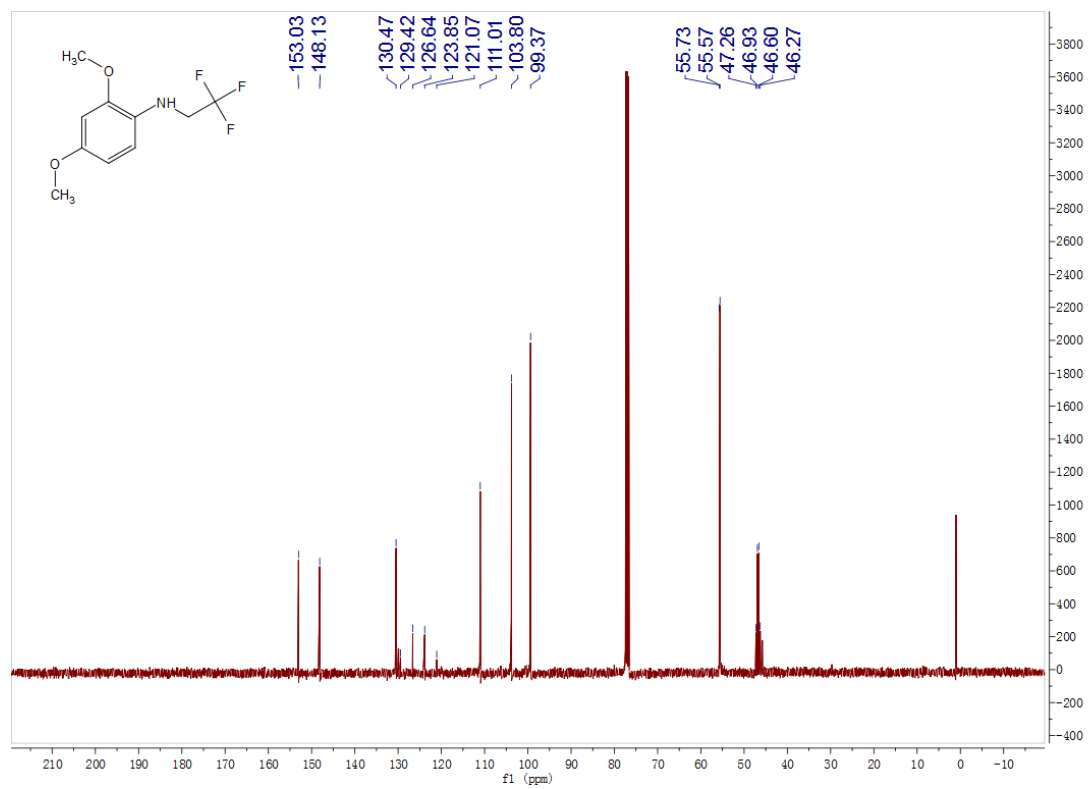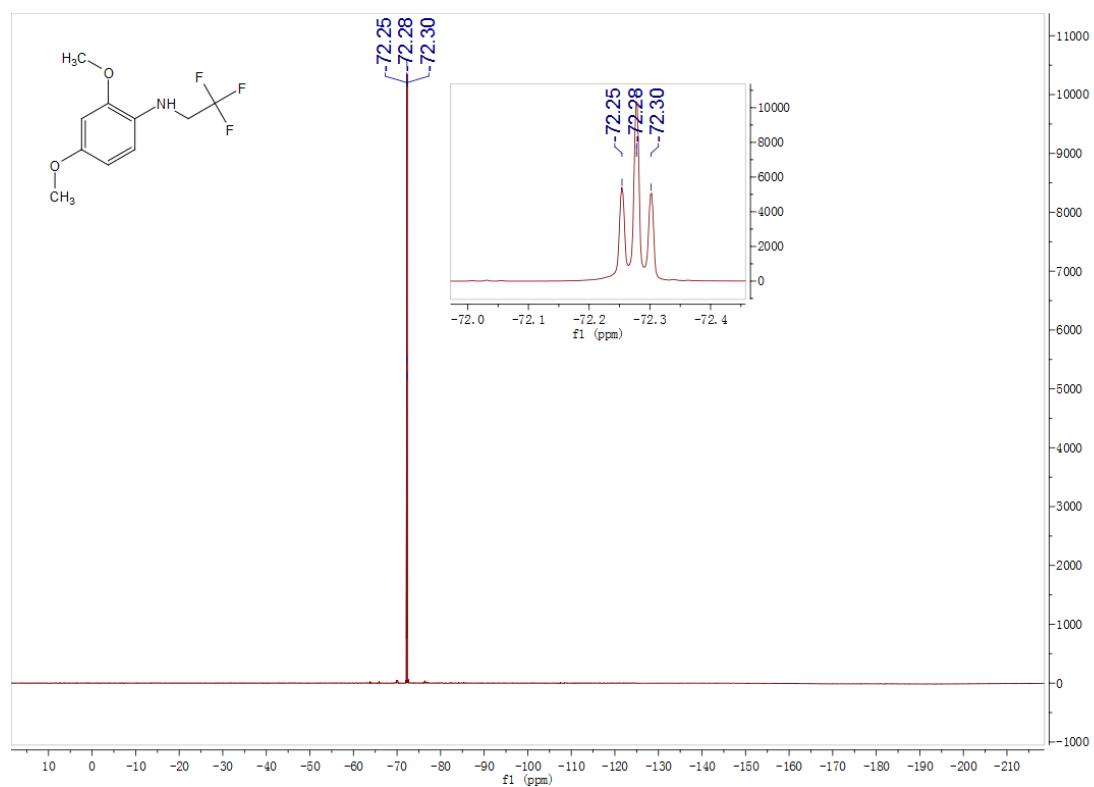

**3, 5-Dimethyl-N-(2, 2, 2-trifluoroethyl)benzenamine(2k)**, pale yellow liquid, 51.8 mg, 85% yield.  $^1\text{H}$  NMR (400 MHz,  $\text{CDCl}_3$ )  $\delta$  7.06 -6.89 (m, 2H), 6.65 (d,  $J=8.1$  Hz, 1H), 3.83 (q,  $J=8.9$  Hz, 2H), 2.29 (s, 3H), 2.20 (s, 3H).  $^{13}\text{C}$  NMR (100 MHz,  $\text{CDCl}_3$ )  $\delta=141.9$ , 131.4, 128.0, 127.5, 125.2 (q,  $J=278.0$  Hz), 122.7, 110.6, 46.3 (q,  $J=33.0$  Hz), 20.3, 17.3  $^{19}\text{F}$  NMR (377 MHz,  $\text{CDCl}_3$ )  $\delta$  -72.24 (t,  $J=8.9$  Hz). HRMS (EI): calcd for  $\text{C}_{10}\text{H}_{12}\text{F}_3\text{N}$ : 203.0922; found: 203.0926

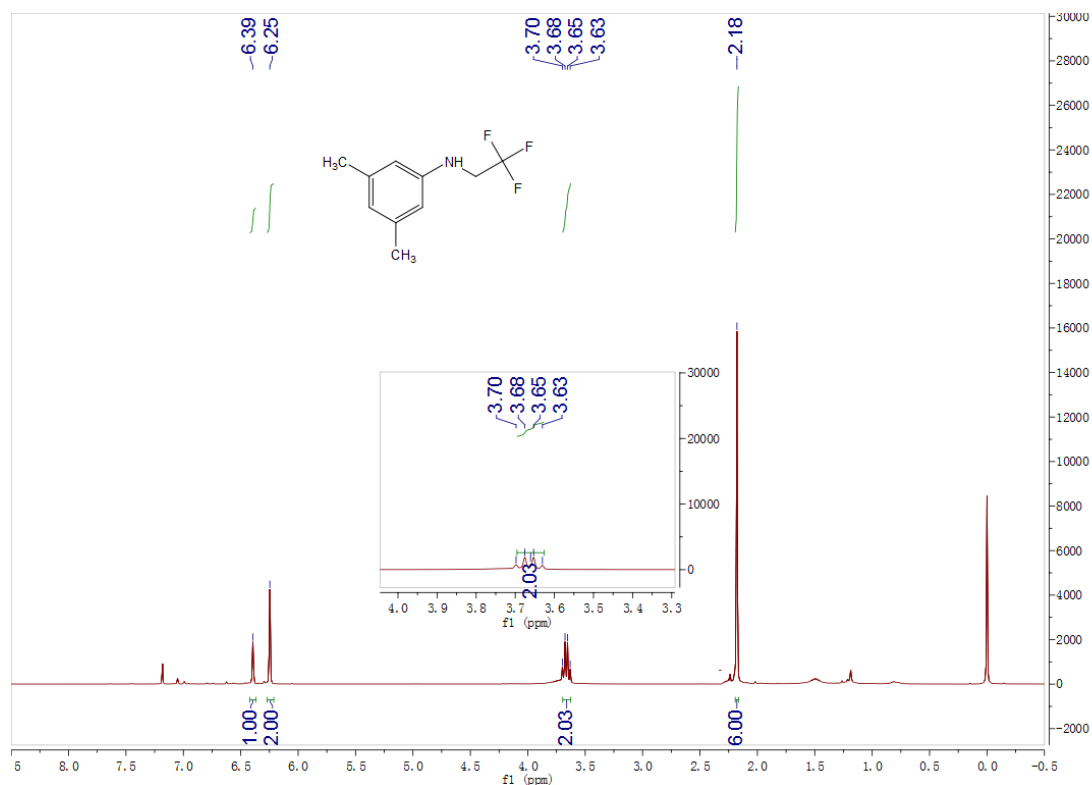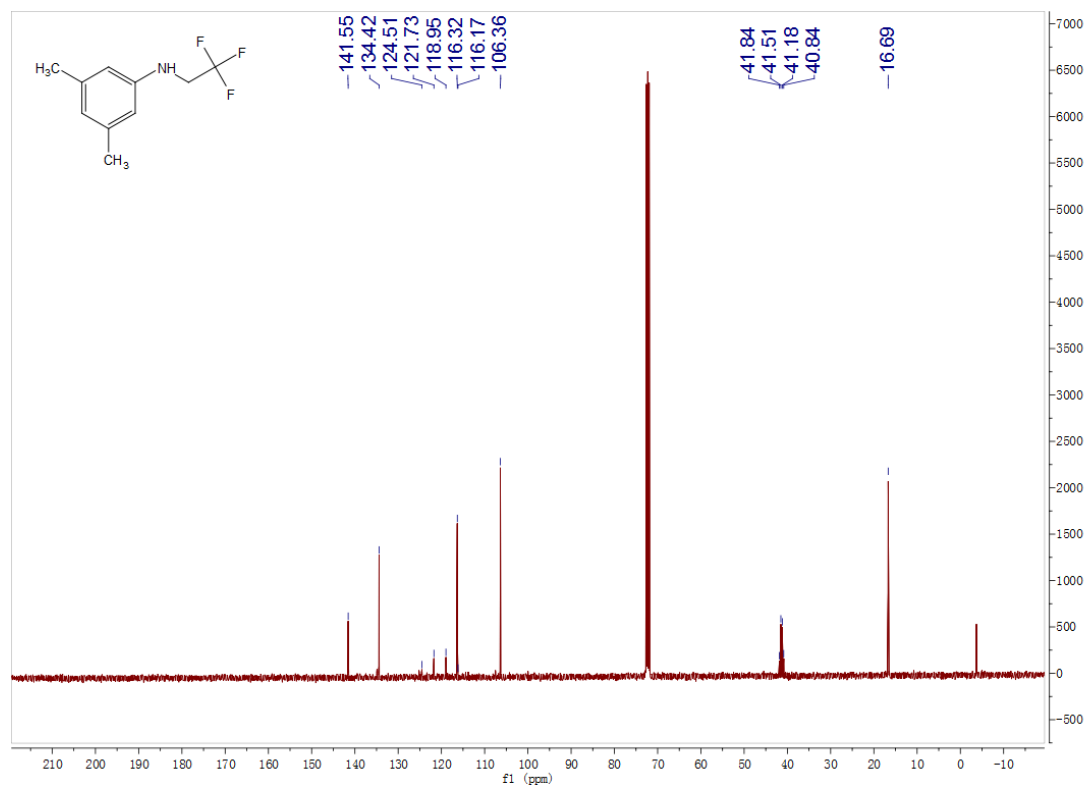

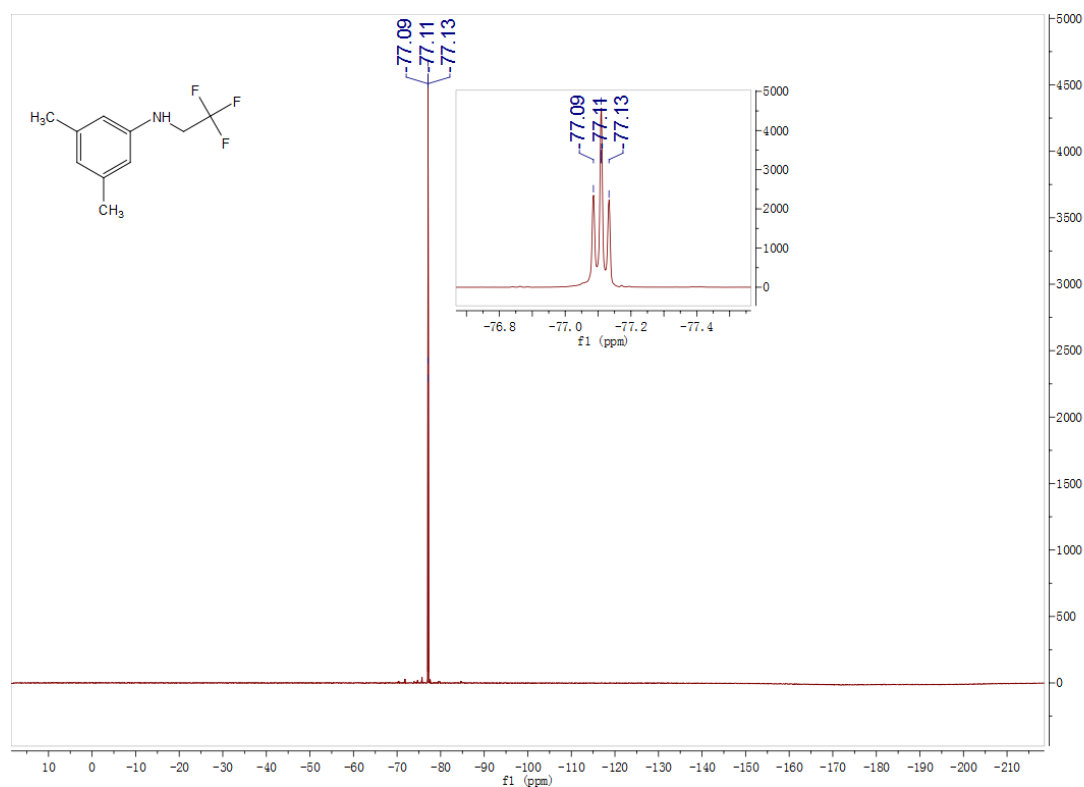

**N-(2, 2, 2-Trifluoroethyl)benzenamine(2l)** pale yellow liquid, 34.2 mg, 65% yield. <sup>1</sup>H NMR (400 MHz, CDCl<sub>3</sub>) δ 7.15 (t, *J*=7.6 Hz, 2H), 6.74 (t, *J*=7.3 Hz, 1H), 6.62 (d, *J*=8.0 Hz, 2H), 3.70 (q, *J*=8.9 Hz, 2H). <sup>13</sup>C NMR (100 MHz, CDCl<sub>3</sub>) δ 146.2, 129.4, 125.1 (q, *J*=280.0 Hz), 119.1, 113.1, 46.1 (q, *J*=34.0 Hz). <sup>19</sup>F NMR (377 MHz, CDCl<sub>3</sub>) δ -72.33 (t, *J*=9.0 Hz). HRMS (EI): calcd for C<sub>8</sub>H<sub>8</sub>F<sub>3</sub>N: 175.0609; found: 175.0612

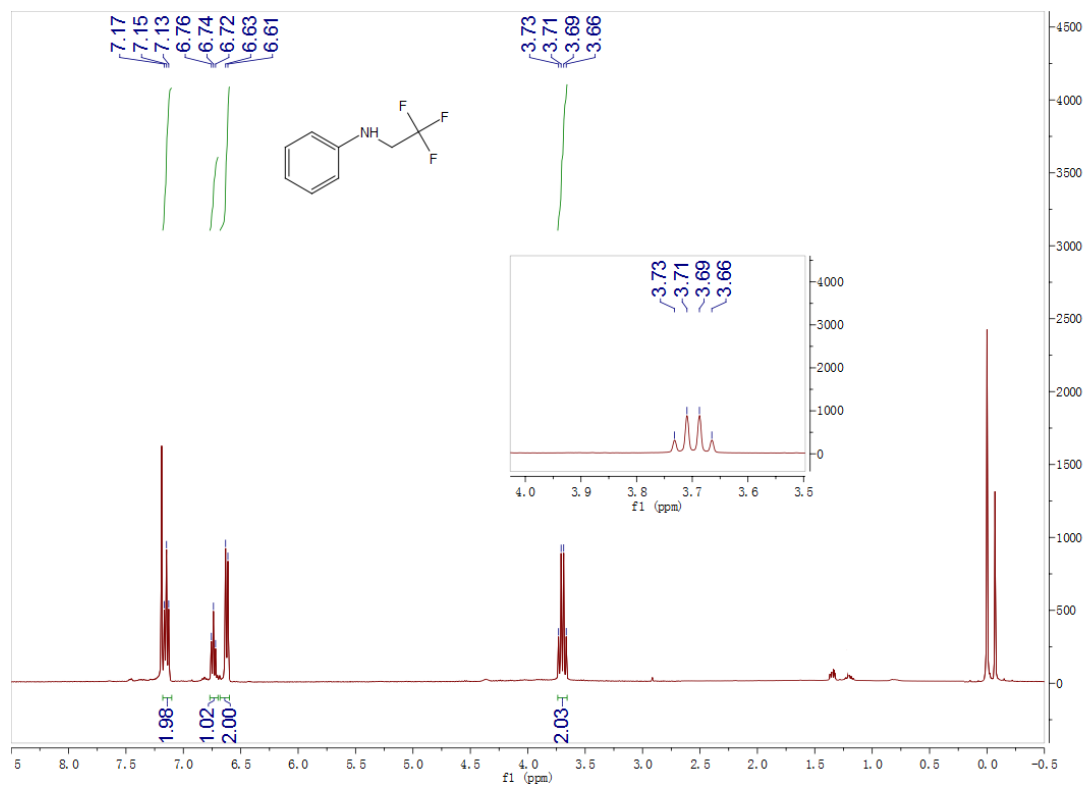

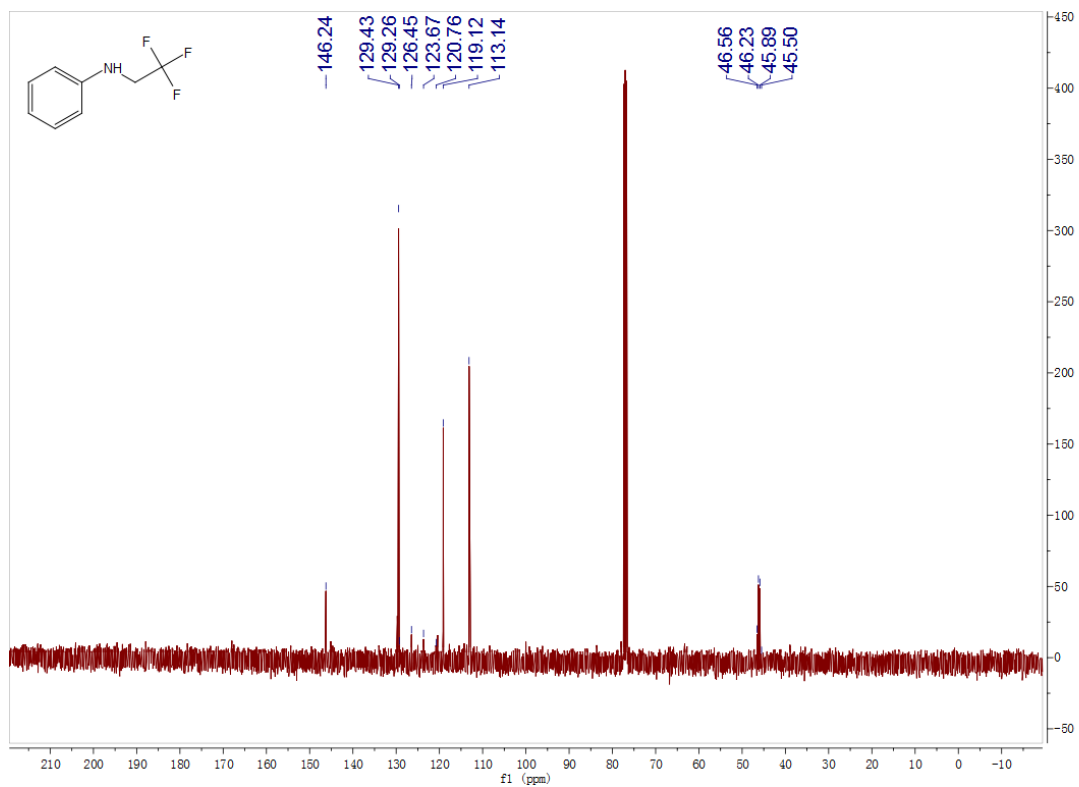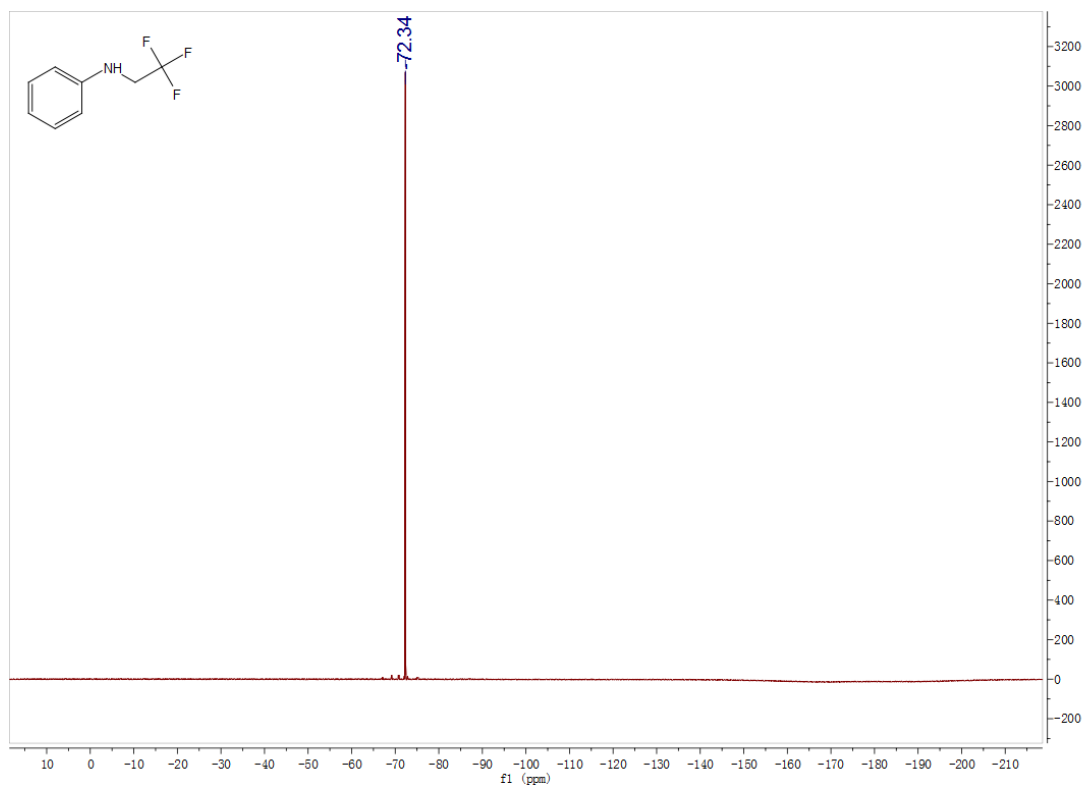

**2-chloro-N-(2, 2, 2-trifluoroethyl)benzenamine(2m)**, pale yellow liquid, 28.3 mg, 45% yield.  $^1\text{H}$  NMR (400 MHz,  $\text{CDCl}_3$ )  $\delta$  7.29 (d,  $J=7.9$  Hz, 1H), 7.17 (t,  $J=7.7$  Hz, 1H), 6.75 (dd,  $J=15.6, 7.9$  Hz, 2H), 3.84 (q,  $J=8.7$  Hz, 2H).  $^{13}\text{C}$  NMR (100 MHz,  $\text{CDCl}_3$ )  $\delta$  =141.2, 128.5, 128.0, 123.8 (q,  $J=278.0$  Hz), 118.7, 118.1, 110.5, 44.6 (q,  $J=34.0$  Hz).  $^{19}\text{F}$  NMR (377 MHz,  $\text{CDCl}_3$ )  $\delta$ -72.25 (t,  $J=8.8$  Hz). HRMS (EI): calcd for  $\text{C}_8\text{H}_7\text{ClF}_3\text{N}$ : 209.0219; found: 209.0215

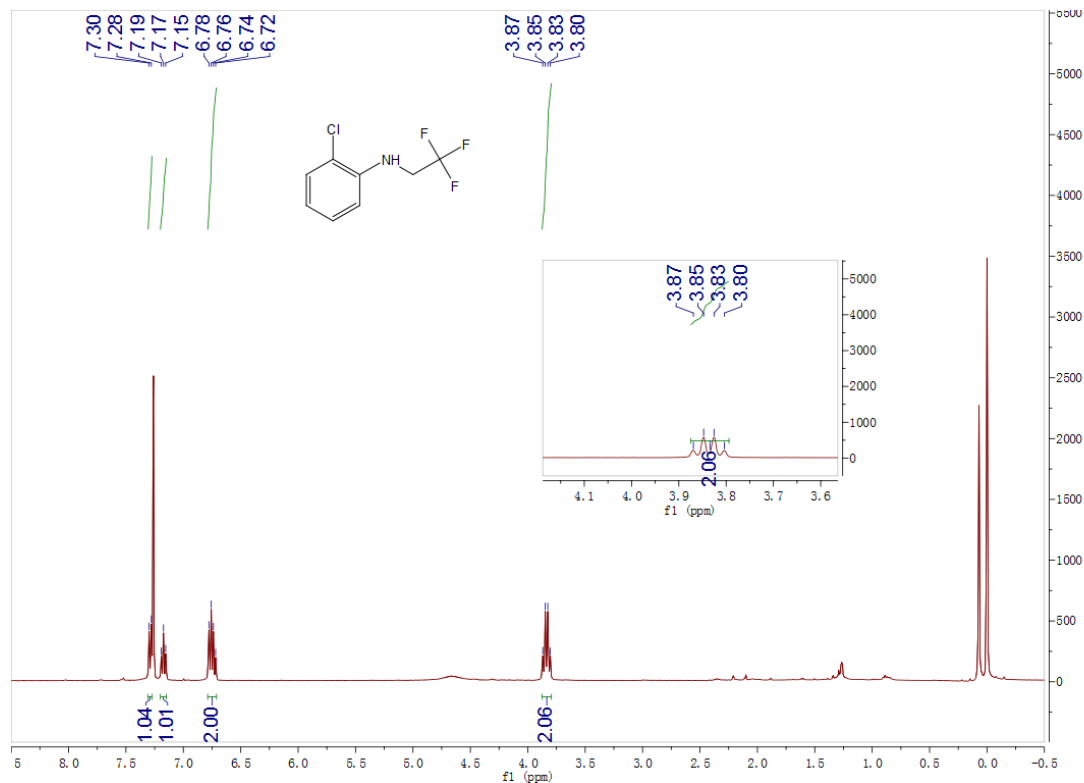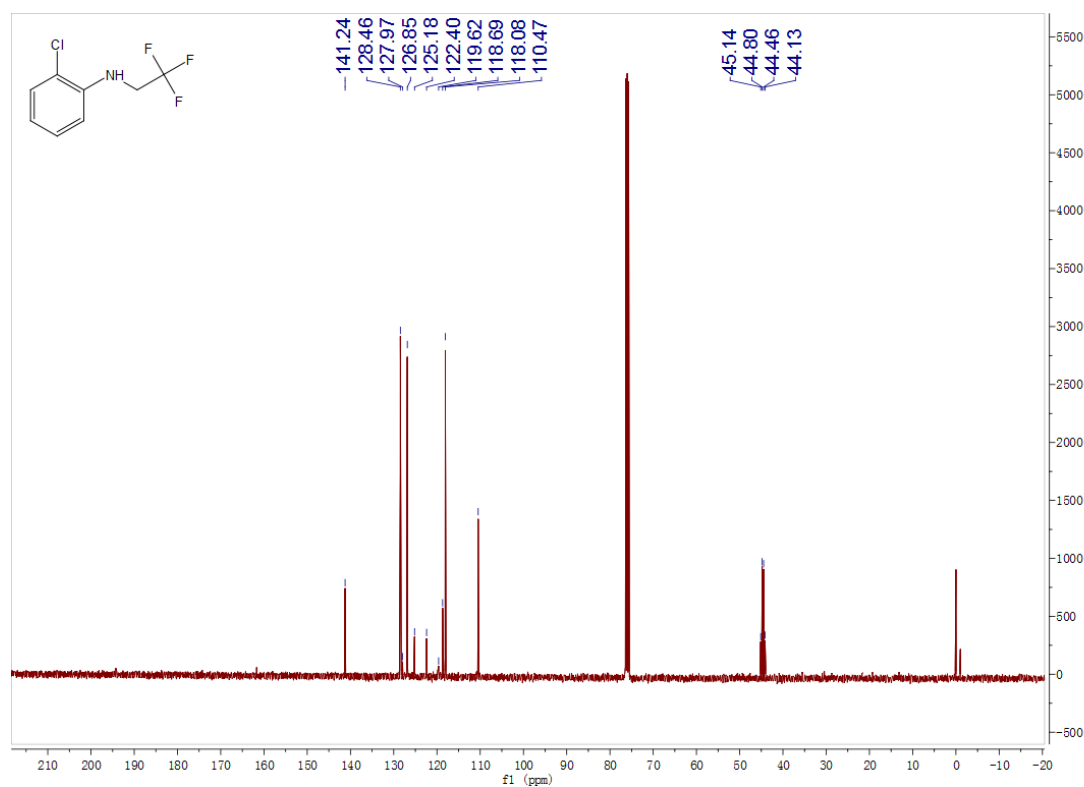

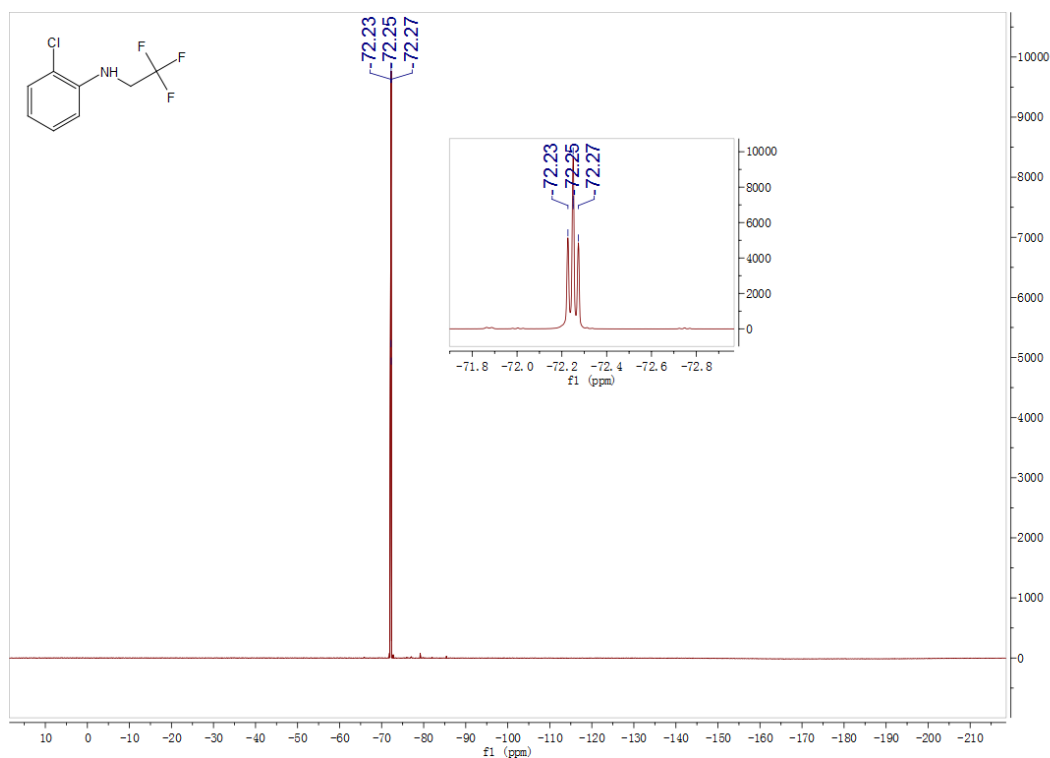

**3-chloro-N-(2,2,2-trifluoroethyl)benzenamine(2n)**, pale yellow liquid, 29.6 mg, 47% yield.  $^1\text{H}$  NMR (400 MHz,  $\text{CDCl}_3$ )  $\delta$  7.04 (t,  $J=8.0$  Hz, 1H), 6.70 (d,  $J=7.9$  Hz, 1H), 6.60 (s, 1H), 6.48 (d,  $J=8.2$  Hz, 1H), 3.93 (s, 1H), 3.73-3.62 (m, 2H).  $^{13}\text{C}$  NMR (100 MHz,  $\text{CDCl}_3$ )  $\delta=146.3$ , 134.2, 129.4, 123.8 (q,  $J=279.0$  Hz), 118.1, 112.0, 110.4, 44.8 (q,  $J=33.0$  Hz).  $^{19}\text{F}$  NMR (377 MHz,  $\text{CDCl}_3$ )  $\delta$  -72.29 (t,  $J=8.8$  Hz). HRMS (EI): calcd for  $\text{C}_8\text{H}_7\text{ClF}_3\text{N}$ : 209.0219; found: 209.0224

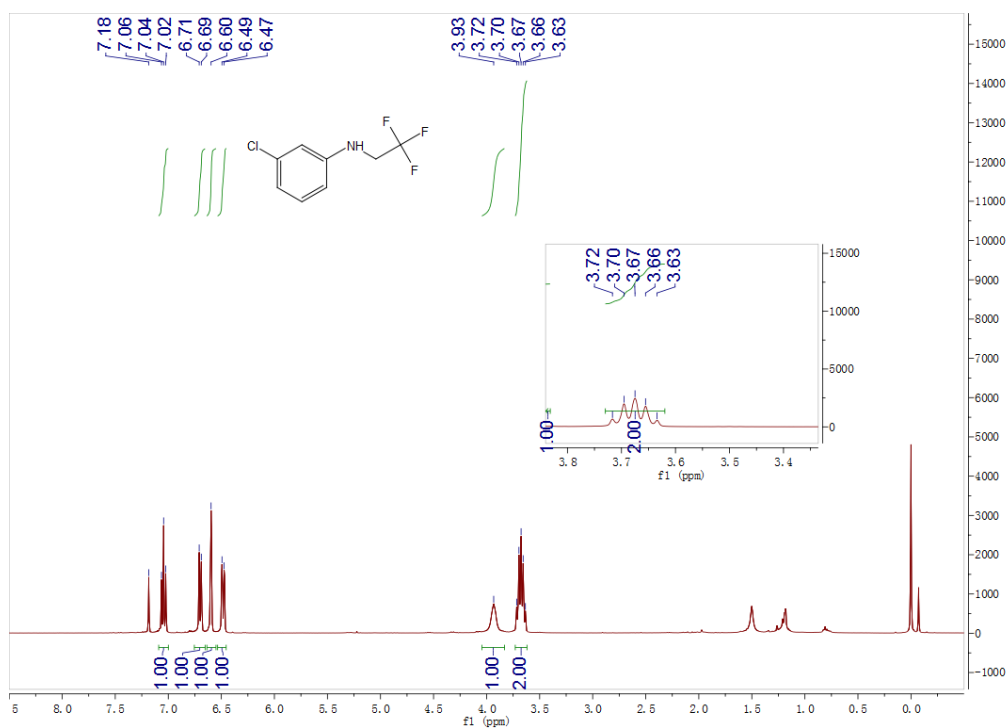

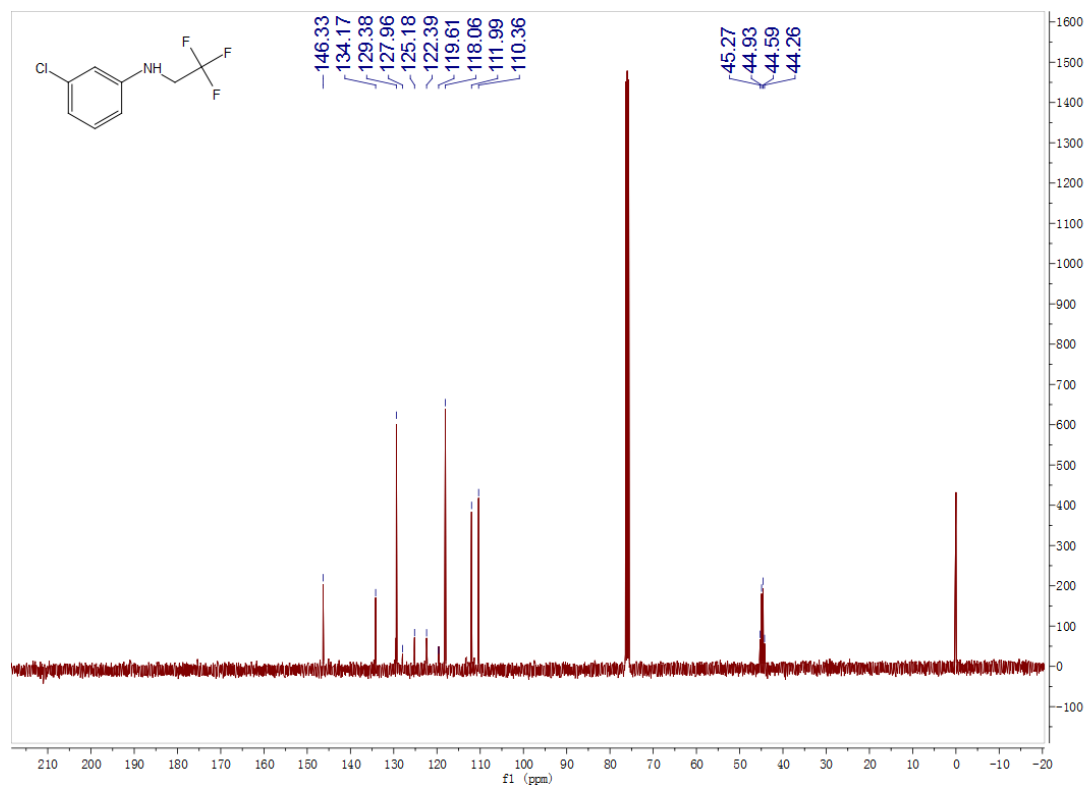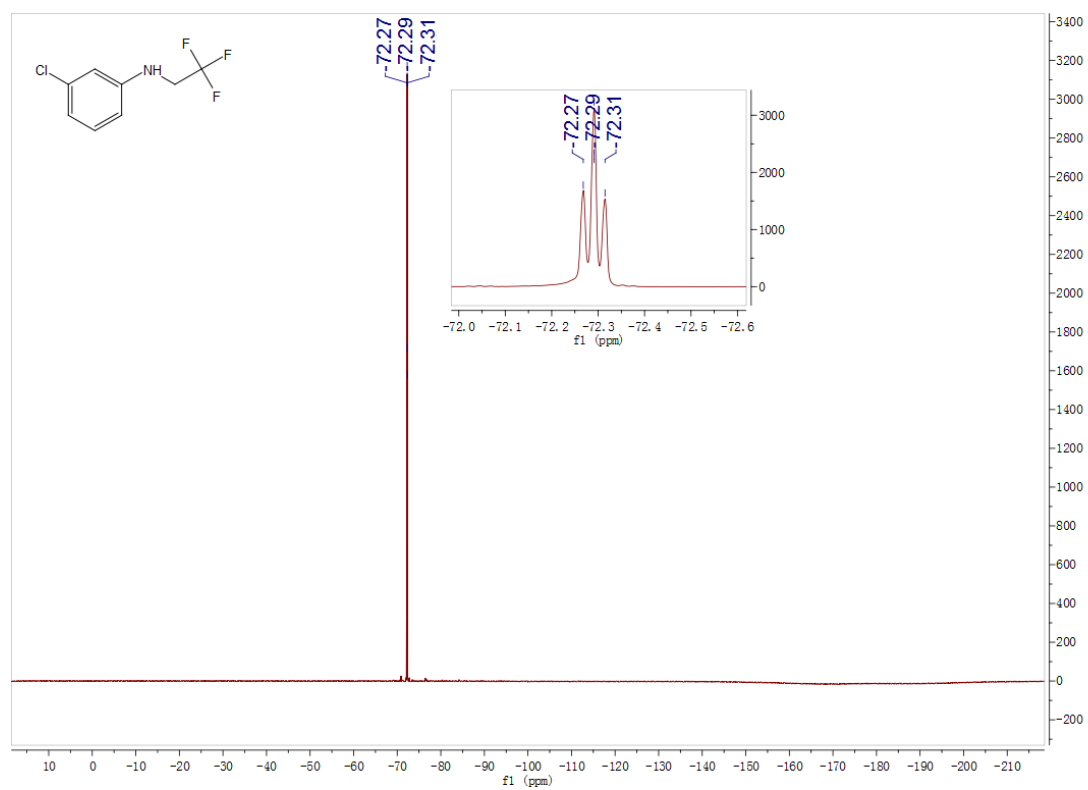

**4-chloro-N-(2, 2, 2-trifluoroethyl)benzenamine(2o)** pale yellow liquid, 34.0 mg, 54% yield.  $^1\text{H}$  NMR (400 MHz,  $\text{CDCl}_3$ )  $\delta$  7.08 (d,  $J=8.1$  Hz, 2H), 6.53 (d,  $J=8.1$  Hz, 2H), 3.65 (q,  $J=8.8$  Hz, 2H).  $^{13}\text{C}$  NMR (100 MHz,  $\text{CDCl}_3$ )  $\delta$  143.8, 128.2, 122.8, 123.9 (q,  $J=278.0$  Hz), 113.2, 45.1 (q,  $J=33.0$  Hz).  $^{19}\text{F}$  NMR (377 MHz,  $\text{CDCl}_3$ )  $\delta$ -72.30 (t,  $J=8.9$  Hz). HRMS (EI): calcd for  $\text{C}_8\text{H}_7\text{ClF}_3\text{N}$ : 209.0219; found: 209.0223

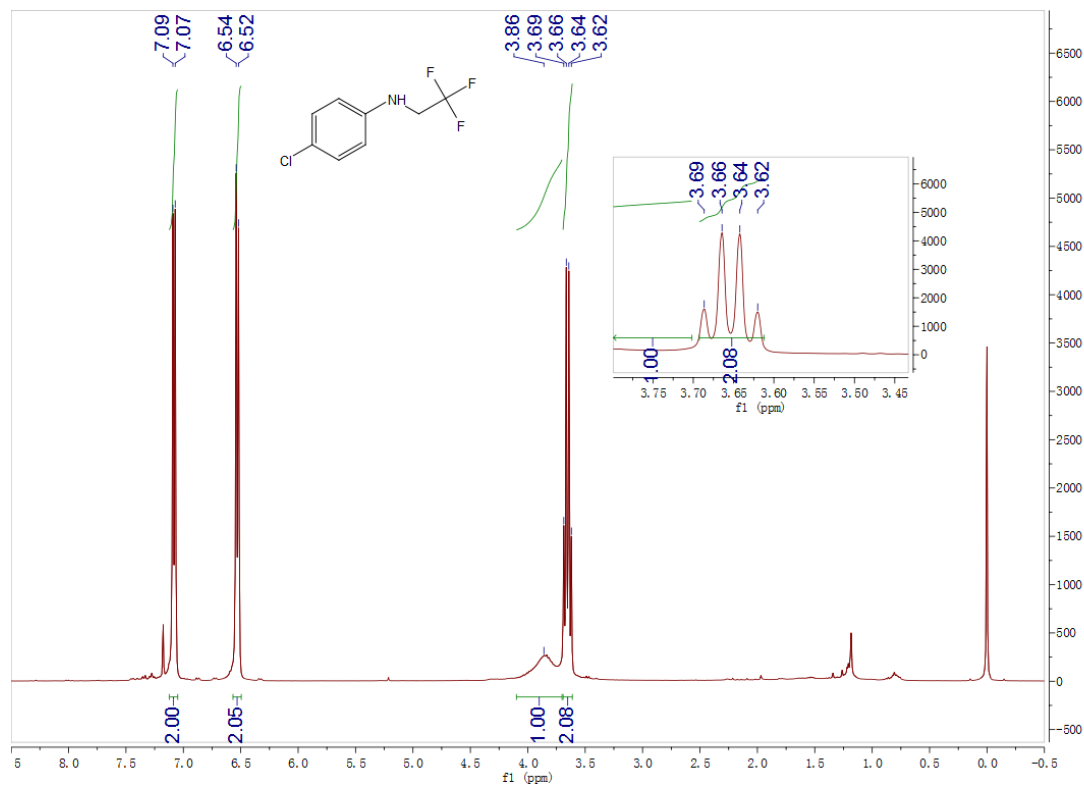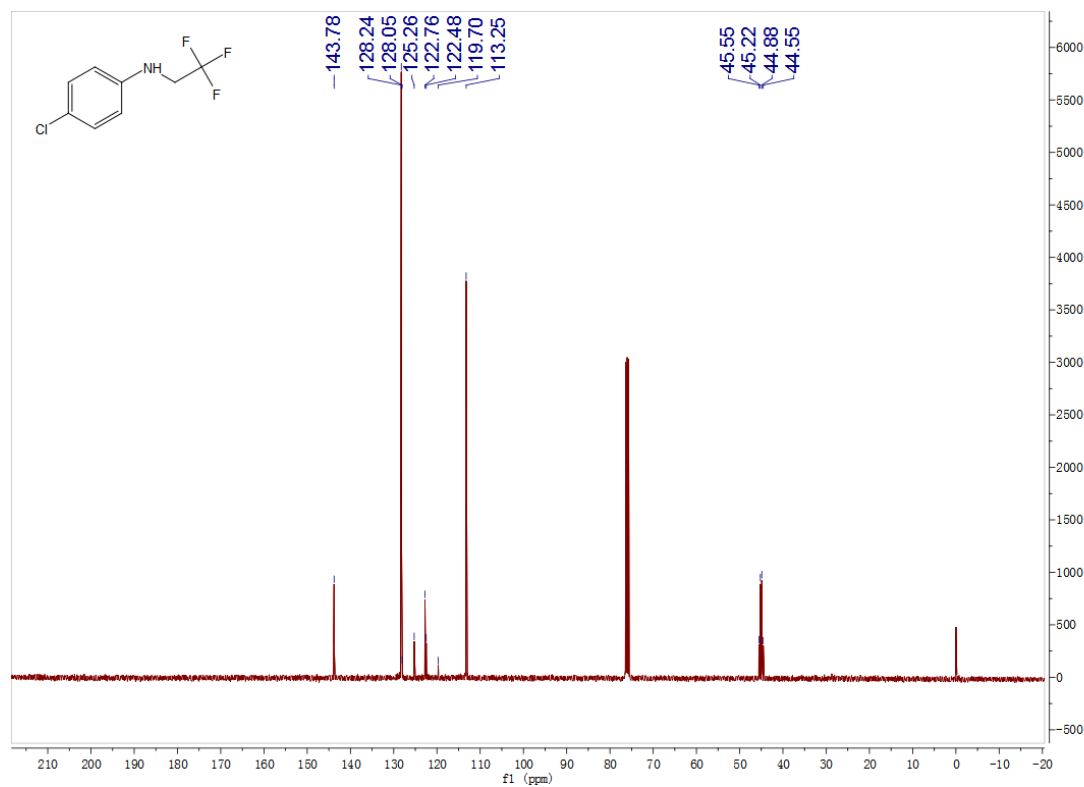



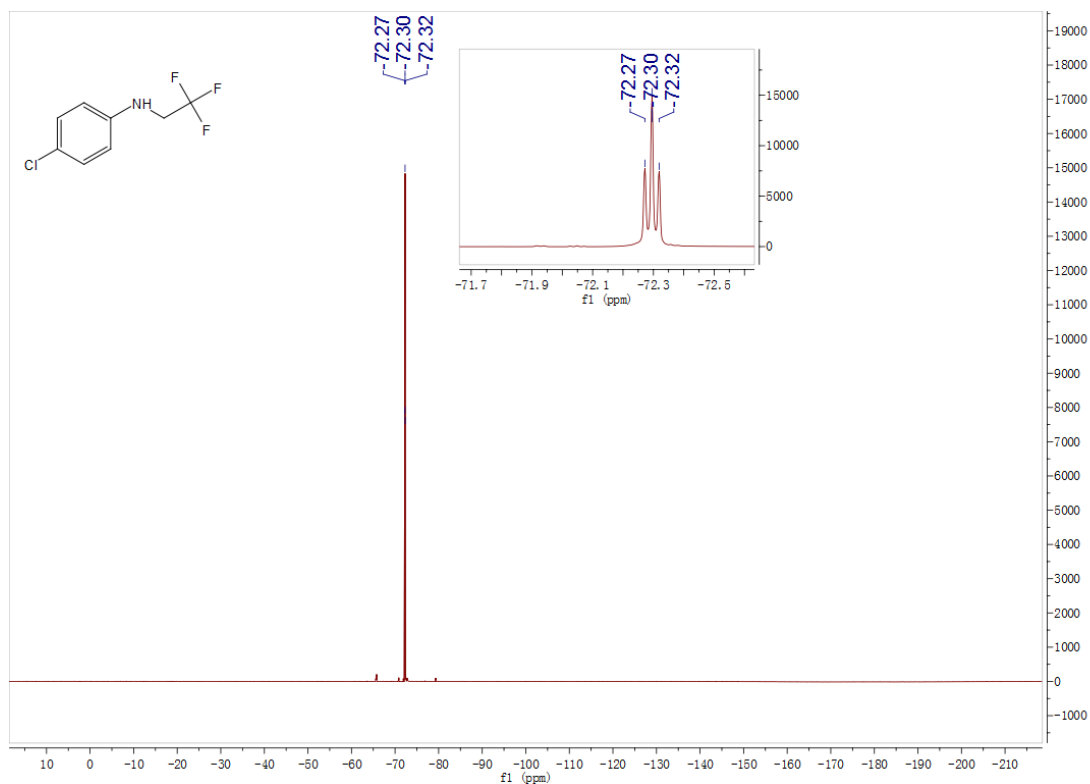

**3-iodo-N-(2, 2, 2-trifluoroethyl)benzenamine(2p)**, pale yellow liquid, 58.7 mg, 65% yield.  $^1\text{H}$  NMR (400 MHz,  $\text{CDCl}_3$ )  $\delta$  7.05 (d,  $J=7.6$  Hz, 1H), 6.96 (s, 1H), 6.84 (t,  $J=7.9$  Hz, 1H), 6.56 (d,  $J=8.1$  Hz, 1H), 3.87 (s, 1H), 3.66 (q,  $J=8.6$  Hz, 2H).  $^{13}\text{C}$  NMR (100 MHz,  $\text{CDCl}_3$ )  $\delta$  146.4, 129.9, 127.1, 123.8 (q,  $J=279.0$  Hz), 120.9, 111.4, 94.1, 44.7 (q,  $J=33.0$  Hz).  $^{19}\text{F}$  NMR (377 MHz,  $\text{CDCl}_3$ )  $\delta$  -72.26 (t,  $J=8.7$  Hz). HRMS (EI): calcd for  $\text{C}_8\text{H}_7\text{F}_3\text{IN}$ : 300.9575; found: 300.9569

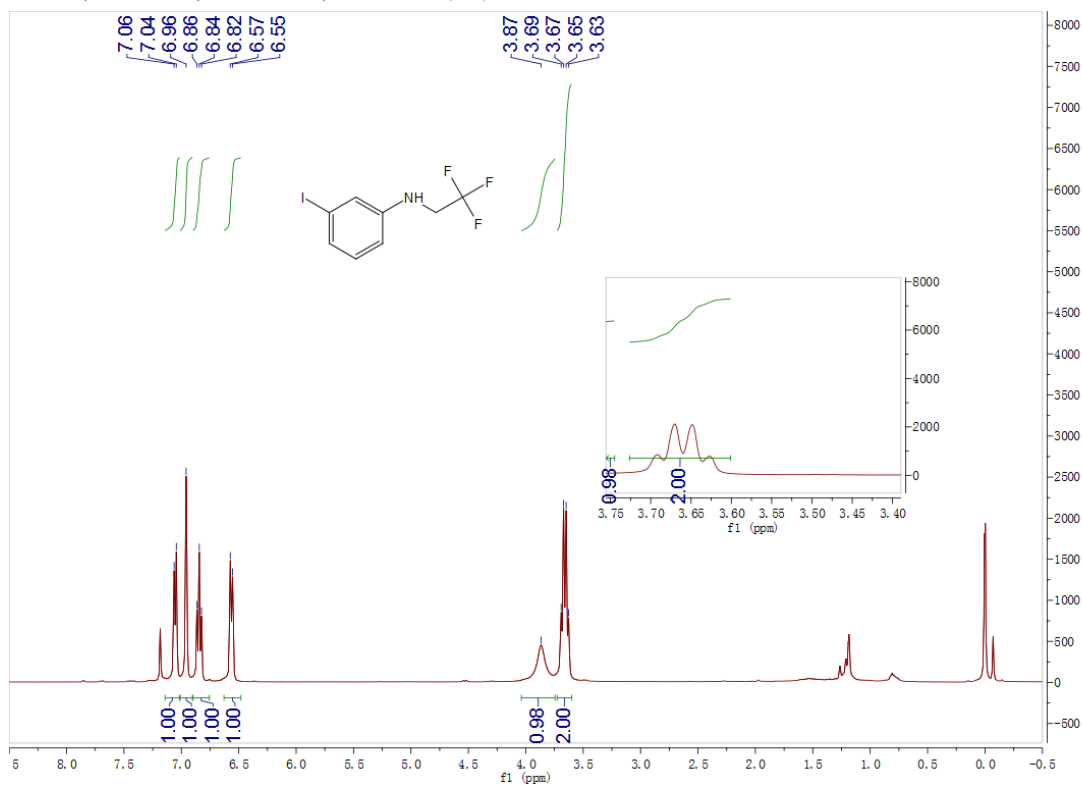

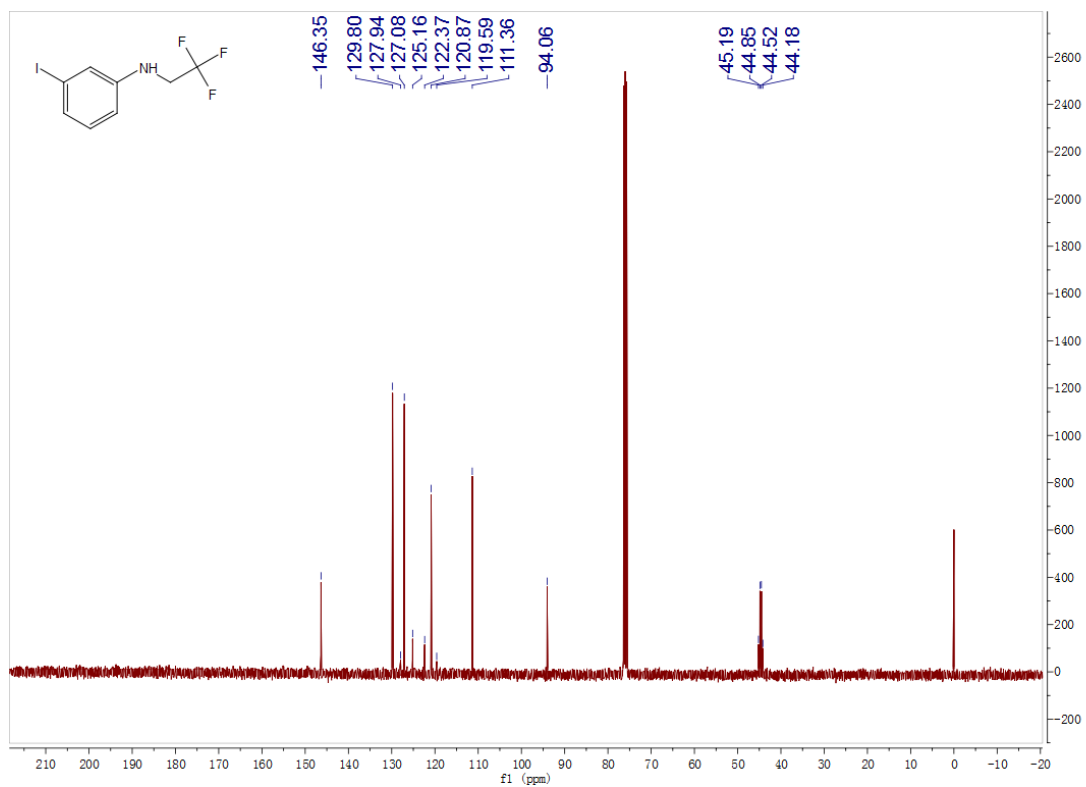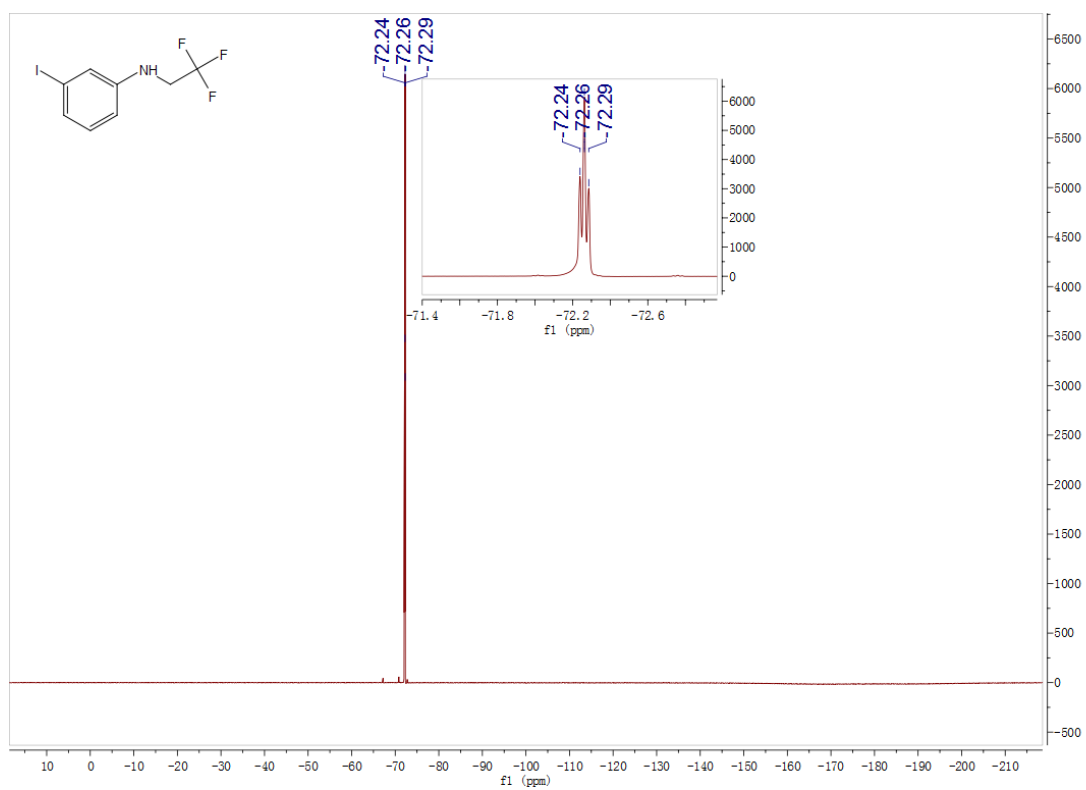

**4-iodo-N-(2, 2, 2-trifluoroethyl)benzenamine(2q)**, pale yellow liquid, 56.9 mg, 63% yield.  $^1\text{H}$  NMR (400 MHz,  $\text{CDCl}_3$ )  $\delta$  7.39 (d,  $J=8.5$  Hz, 2H), 6.40 (d,  $J=8.5$  Hz, 2H), 3.91 (s, 1H), 3.66 (q,  $J=8.8$  Hz, 2H).  $^{13}\text{C}$  NMR (100 MHz,  $\text{CDCl}_3$ )  $\delta$  144.9, 137.0, 123.82 (q,  $J=278.0$  Hz), 114.3, 79.1, 44.8 (q,  $J=34.0$  Hz, 2H).  $^{19}\text{F}$  NMR (377 MHz,  $\text{CDCl}_3$ )  $\delta$  -72.26 (t,  $J=8.8$  Hz). HRMS (EI): calcd for  $\text{C}_8\text{H}_7\text{F}_3\text{IN}$ : 300.9575; found: 300.9582

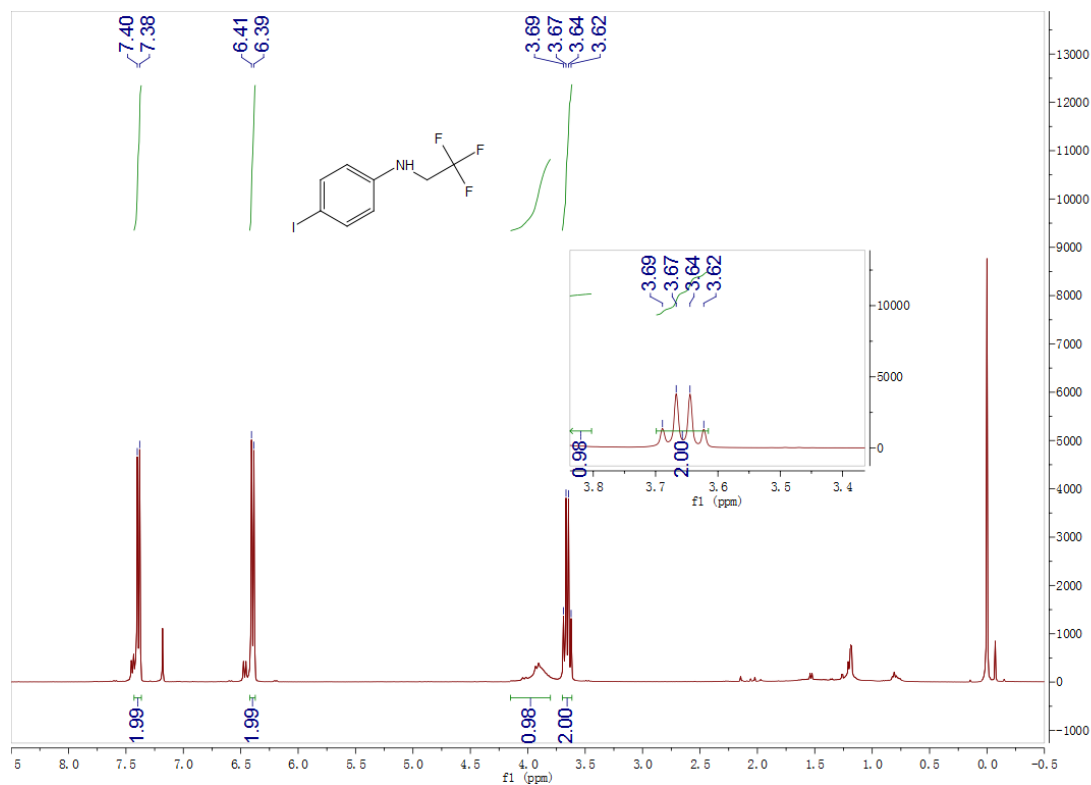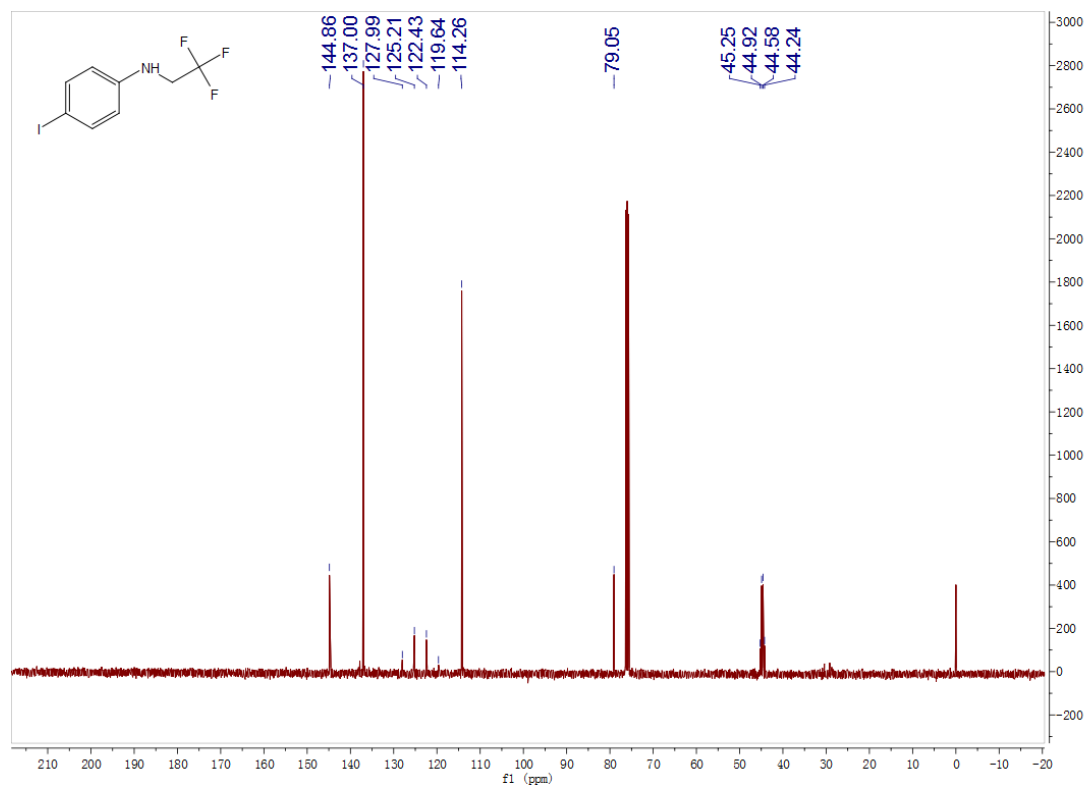

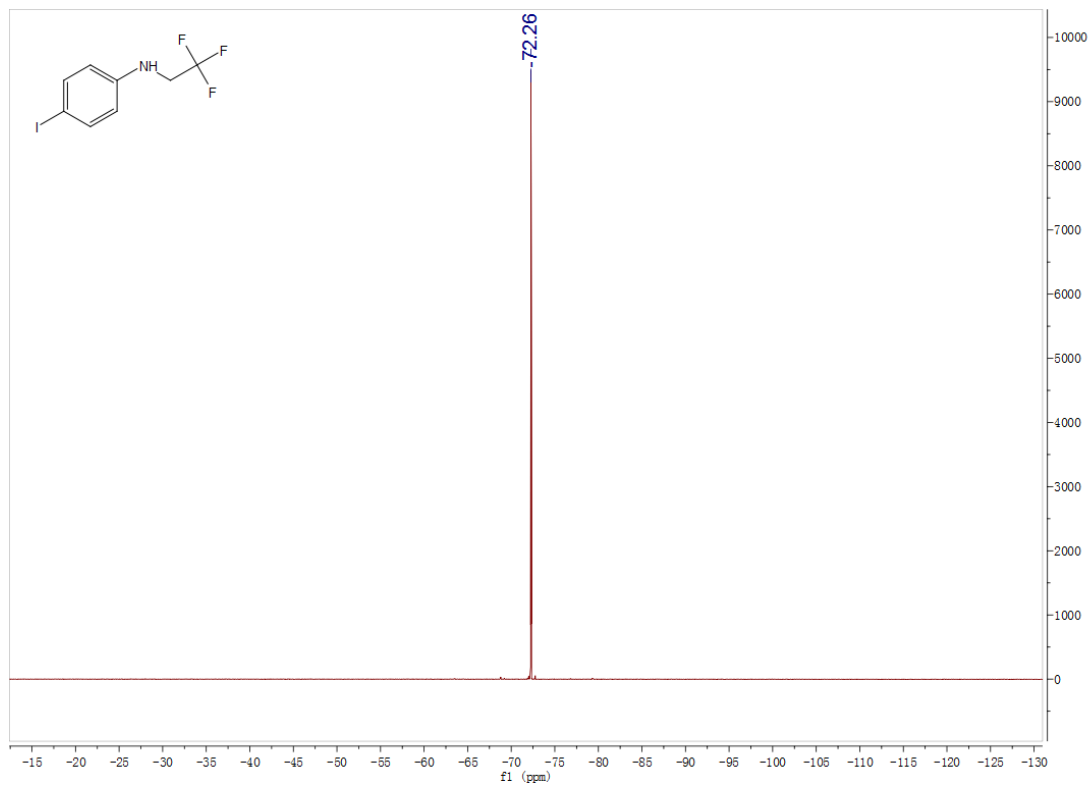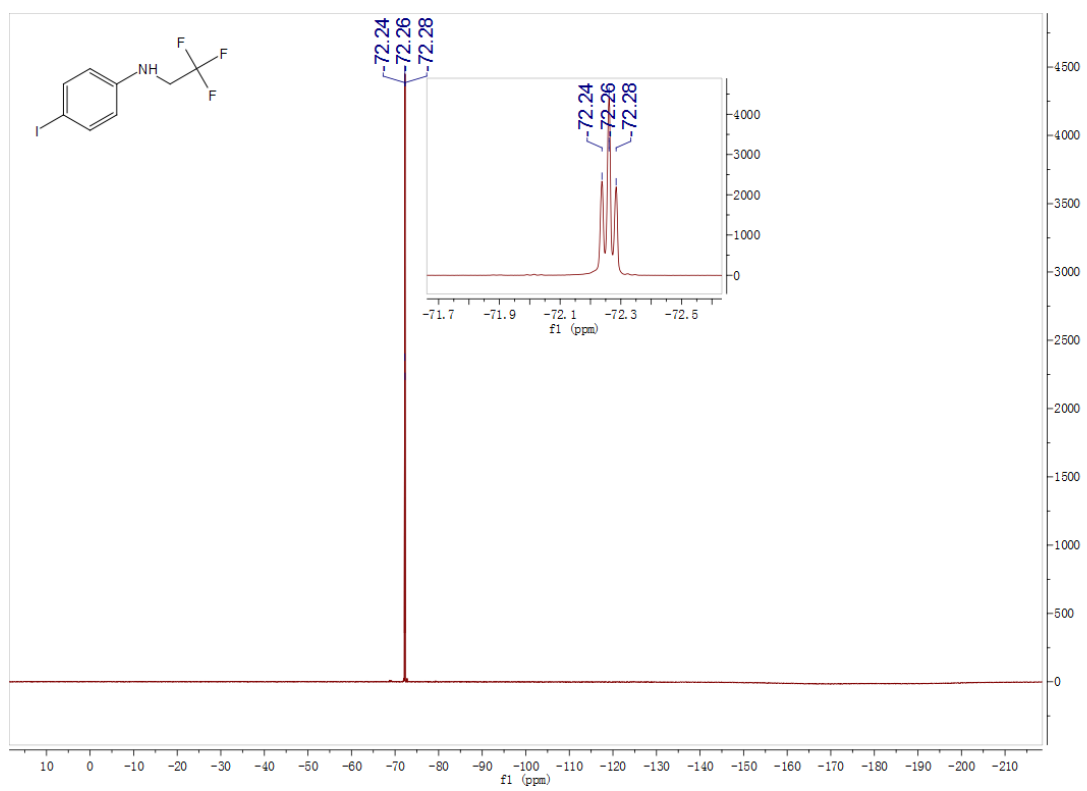

**3-bromo-N-(2, 2, 2-trifluoroethyl)benzenamine(2r)**, pale yellow liquid, 48.0 mg, 63% yield.  $^1\text{H}$  NMR (400 MHz,  $\text{CDCl}_3$ )  $\delta$  6.99 (t,  $J=8.0$  Hz, 1H), 6.85 (d,  $J=7.8$  Hz, 1H), 6.76 (s, 1H), 6.53 (d,  $J=8.1$  Hz, 1H), 3.67 (q,  $J=8.8$  Hz, 2H).  $^{13}\text{C}$  NMR (100 MHz,  $\text{CDCl}_3$ )  $\delta$  146.5, 129.7, 123.8 (q,  $J=278.0$  Hz), 122.3, 121.0, 114.9, 110.8, 44.8(q,  $J=34.0$  Hz).  $^{19}\text{F}$  NMR (377 MHz,  $\text{CDCl}_3$ )  $\delta$ -72.28 (t,  $J=8.8$  Hz). HRMS (EI): calcd for  $\text{C}_8\text{H}_7\text{BrF}_3\text{N}$ : 252.9714; found: 252.9719

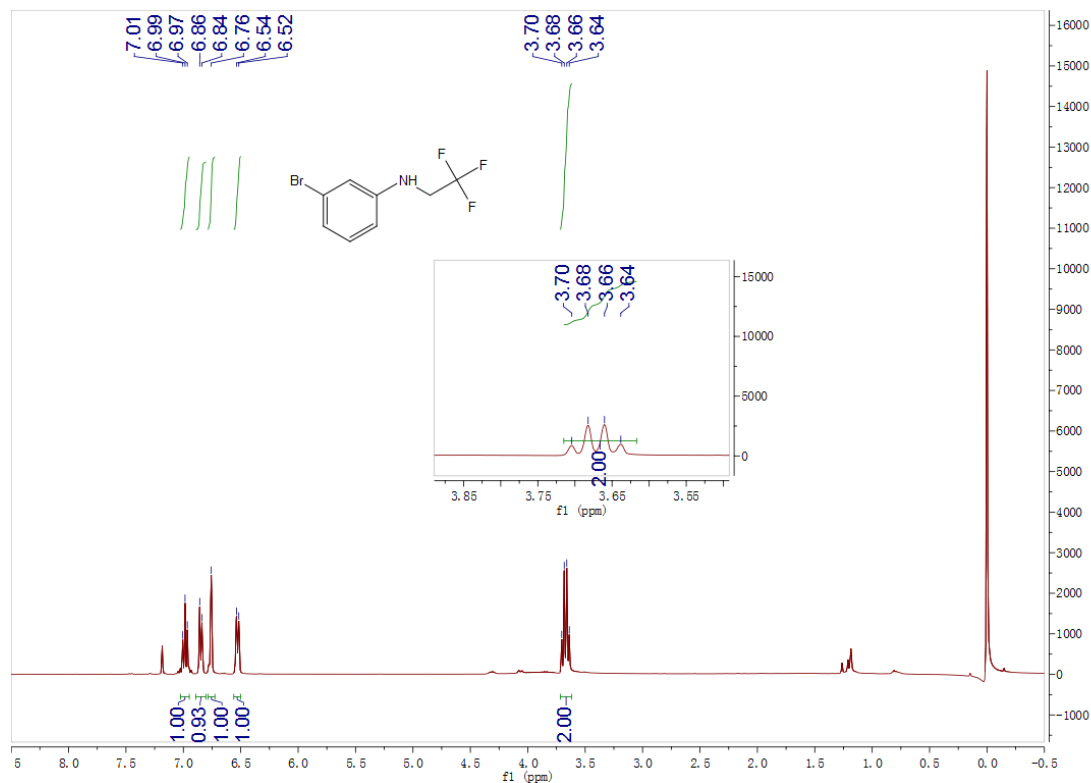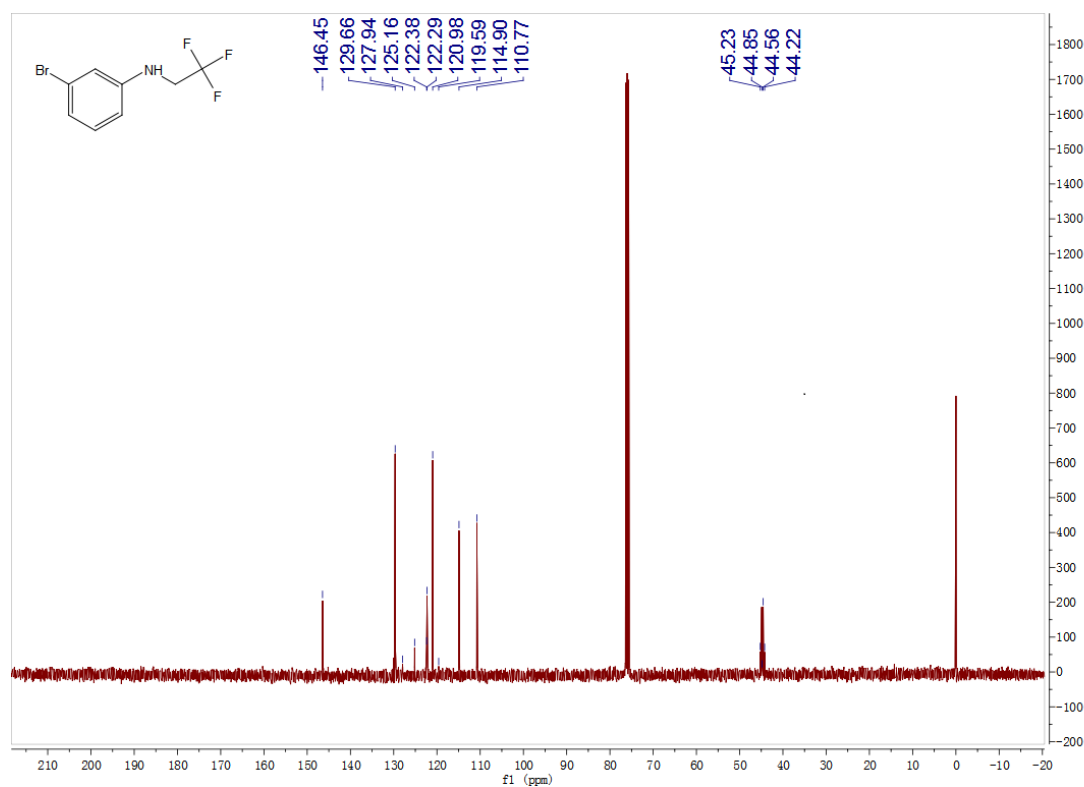

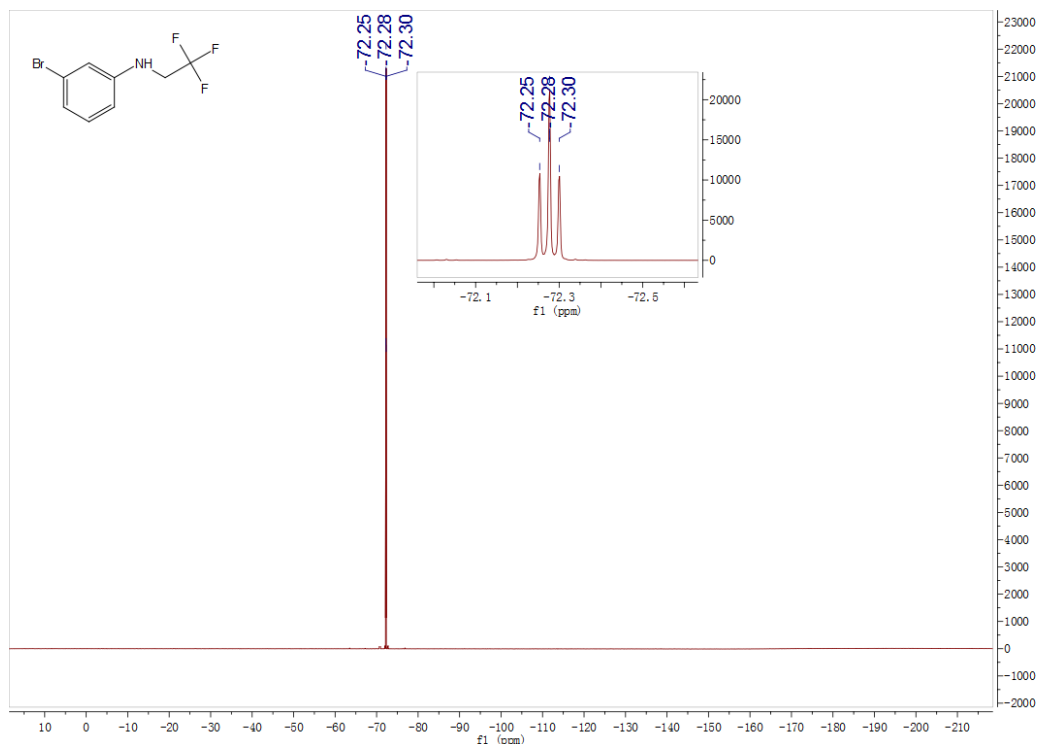

**4-bromo-N-(2, 2, 2-trifluoroethyl)benzenamine(2s)**, pale yellow liquid, 51.8 mg, 68% yield.  $^1\text{H}$  NMR (400 MHz,  $\text{CDCl}_3$ )  $\delta$  7.21 (t,  $J=9.7$  Hz, 2H), 6.49 (d,  $J=8.7$  Hz, 2H), 3.66 (q,  $J=8.9$  Hz, 2H).  $^{13}\text{C}$  NMR (100 MHz,  $\text{CDCl}_3$ )  $\delta$  144.2, 131.1, 123.8 (q,  $J=278.0$  Hz), 113.7, 109.8, 44.9 (q,  $J=33.0$  Hz).  $^{19}\text{F}$  NMR (377 MHz,  $\text{CDCl}_3$ )  $\delta$  -72.28 (t,  $J=8.8$  Hz). HRMS (EI): calcd for  $\text{C}_8\text{H}_7\text{BrF}_3\text{N}$ : 252.9714; found: 252.9718

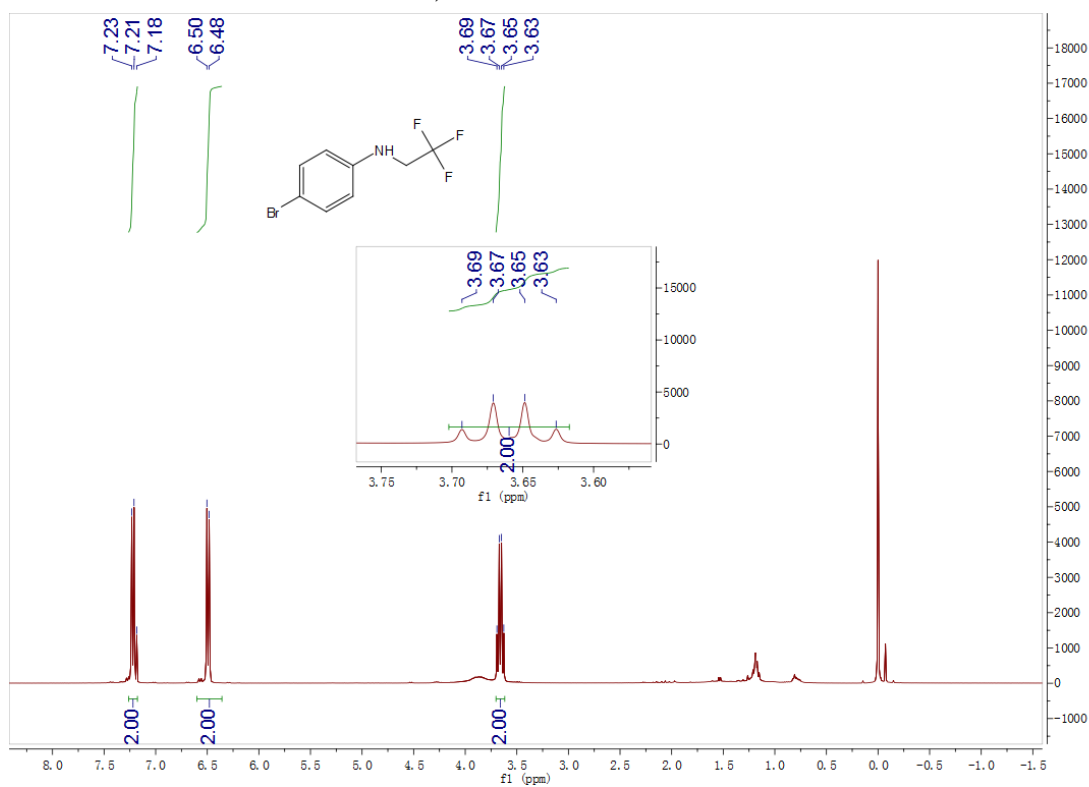

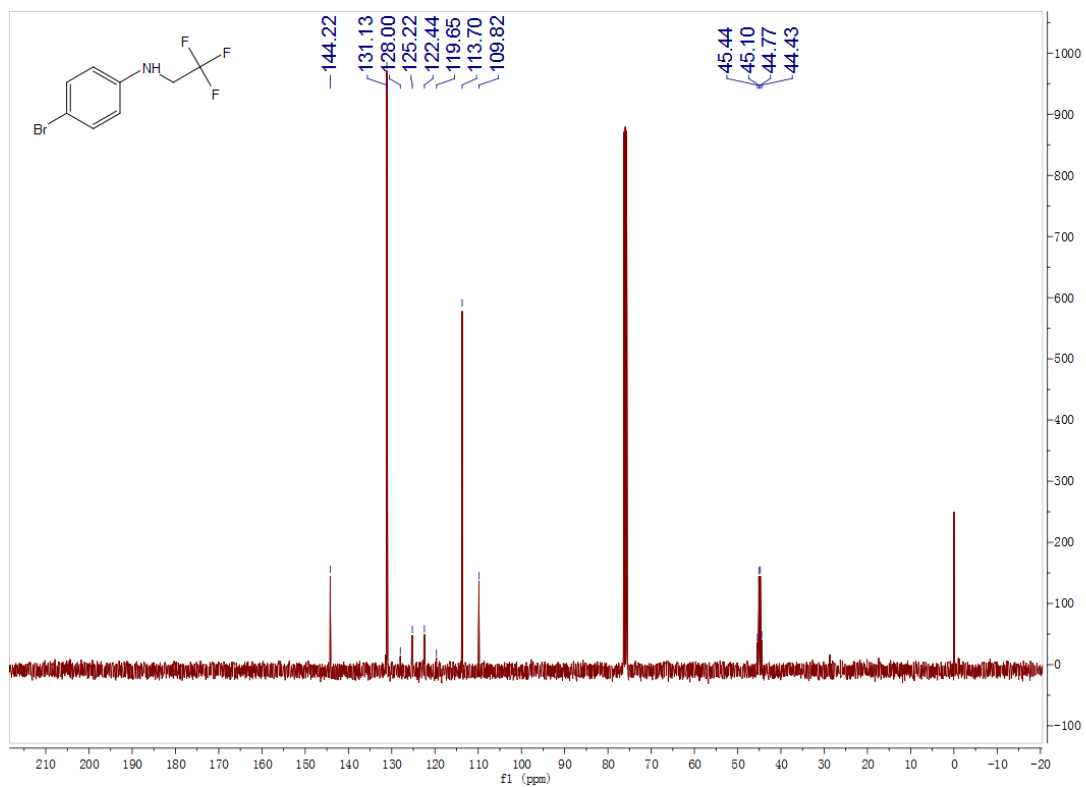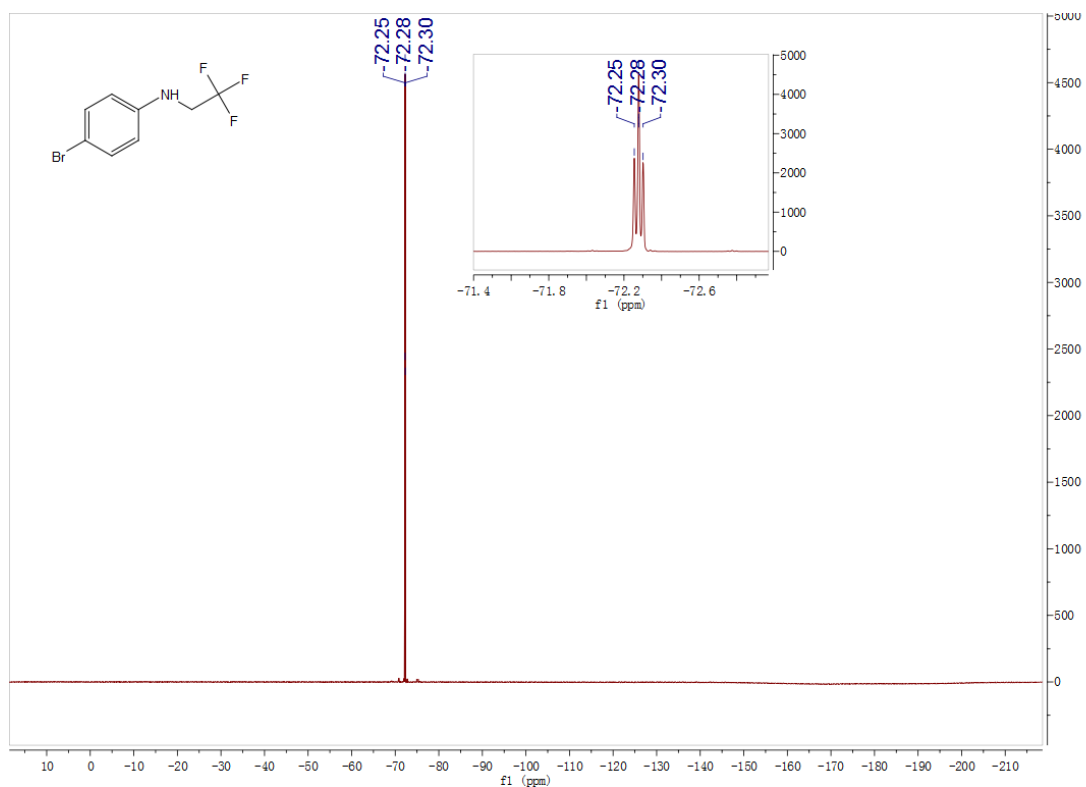

**N-Methyl-N-(2, 2, 2-trifluoroethyl)benzenamine(4a)**, pale yellow liquid, 40.9 mg, 72% yield.  $^1\text{H NMR}$  (400 MHz,  $\text{CDCl}_3$ )  $\delta$  7.19 (d,  $J=4.5$  Hz, 2H), 6.75 (t,  $J=6.9$  Hz, 3H), 3.79 (q,  $J=8.9$  Hz, 2H), 2.98 (s, 3H).  $^{13}\text{C NMR}$  (100 MHz,  $\text{CDCl}_3$ )  $\delta$  =148.7,130.0,125.6(q,  $J=281.0$  Hz),118.3,112.7,54.4(q,  $J=32.0$  Hz),39.2.  $^{19}\text{F NMR}$  (377 MHz,  $\text{CDCl}_3$ )  $\delta$  -70.49 (t,  $J=8.9$  Hz). HRMS (EI): calcd for  $\text{C}_9\text{H}_{10}\text{F}_3\text{N}$ : 189.0765; found: 189.0772

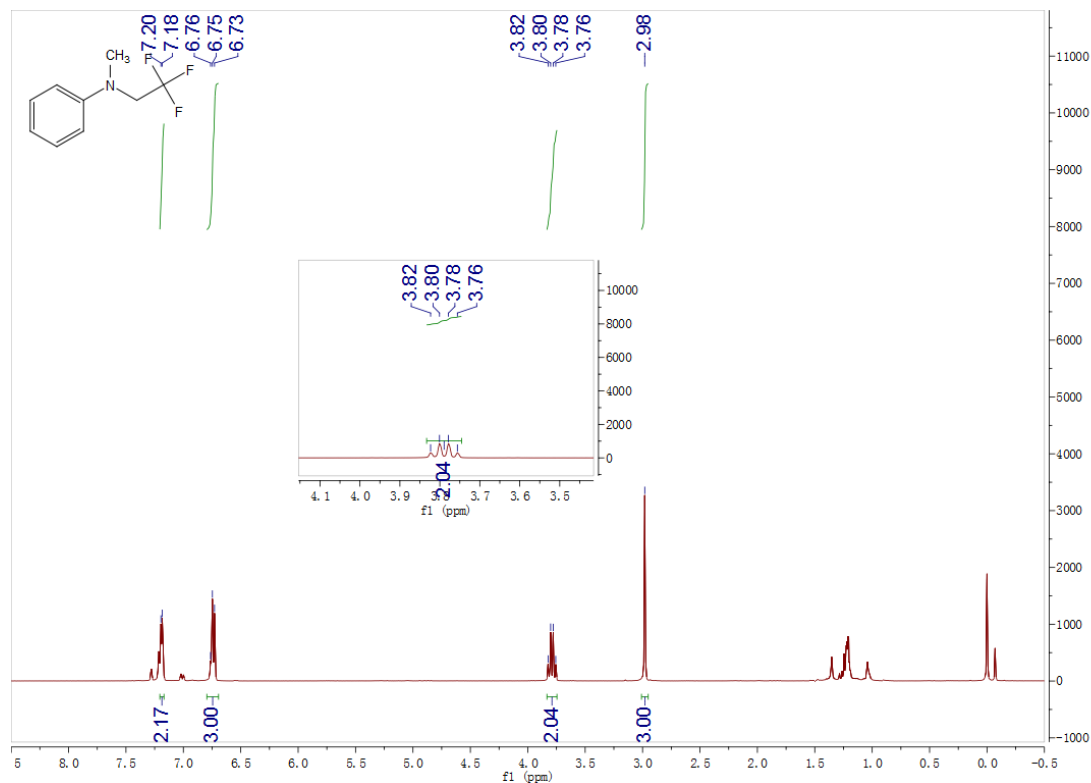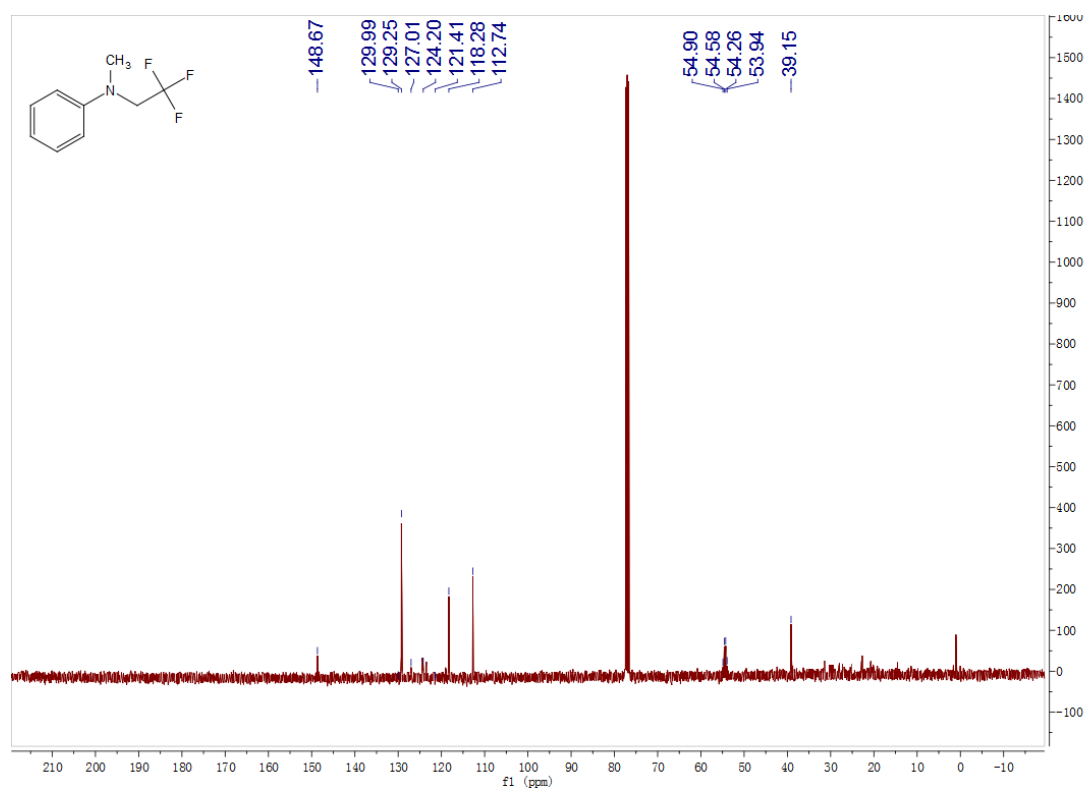



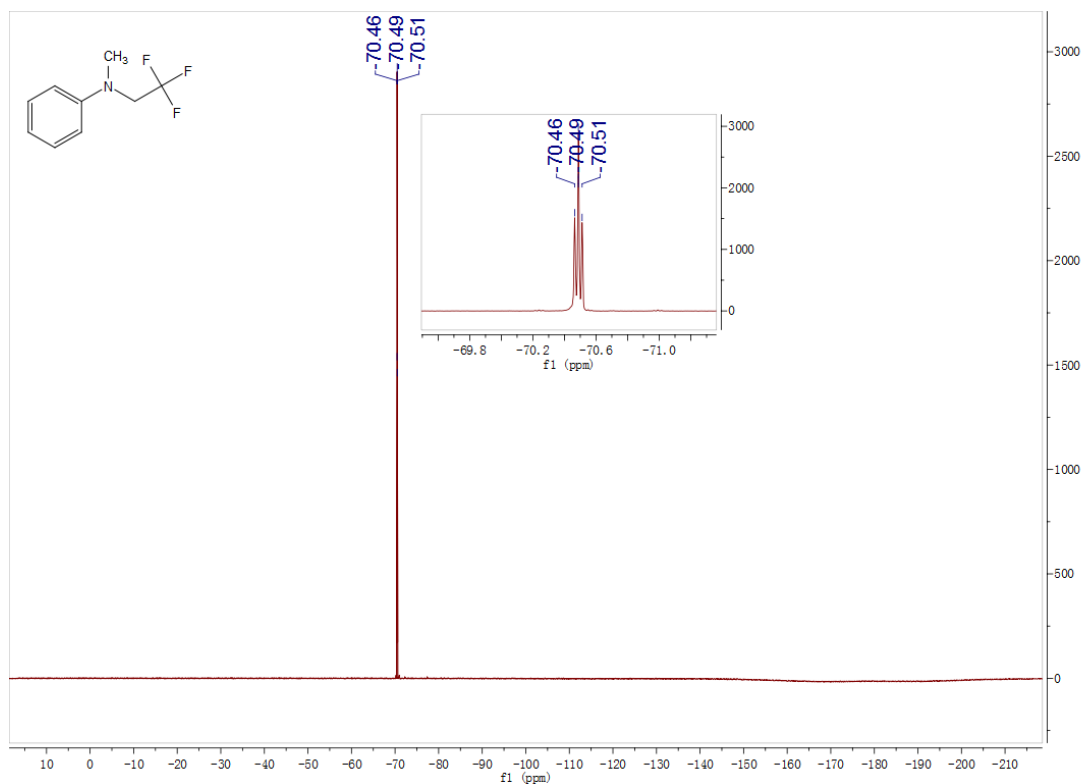

**4-methoxy-N-methyl-N-(2, 2, 2-trifluoroethyl)benzenamine(4b)**, pale yellow liquid, 49.3 mg, 75% yield.  $^1\text{H}$  NMR (400 MHz,  $\text{CDCl}_3$ )  $\delta$  6.77 (d,  $J=8.8$  Hz, 2H), 6.70 (d,  $J=8.3$  Hz, 2H), 3.74-3.64 (m, 5H), 2.92 (s, 3H).  $^{13}\text{C}$  NMR (100 MHz,  $\text{CDCl}_3$ )  $\delta$ =151.7, 142.4, 123.7(q,  $J=281.0$  Hz), 113.7, 54.6(q,  $J=32.0$  Hz), 54.7, 38.6.  $^{19}\text{F}$  NMR (377MHz,  $\text{CDCl}_3$ )  $\delta$  -77.53 (t,  $J=9.0$  Hz). HRMS (EI): calcd for  $\text{C}_{10}\text{H}_{12}\text{F}_3\text{NO}$ : 219.0871; found: 219.0866

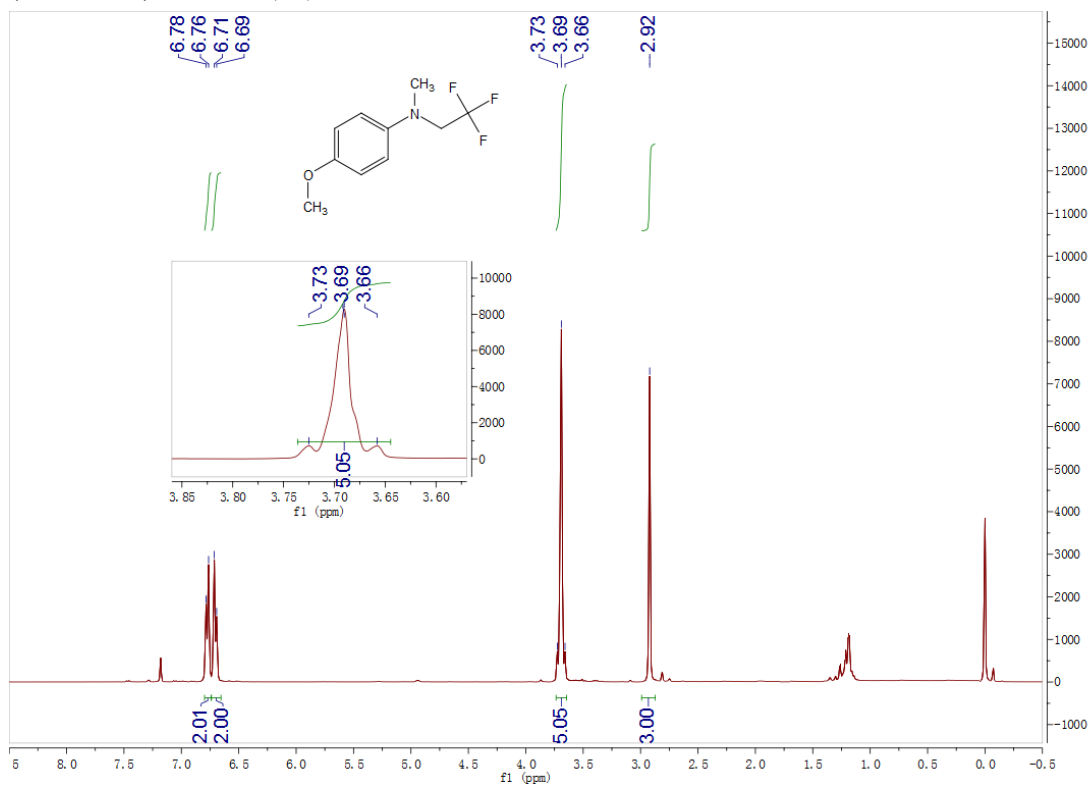

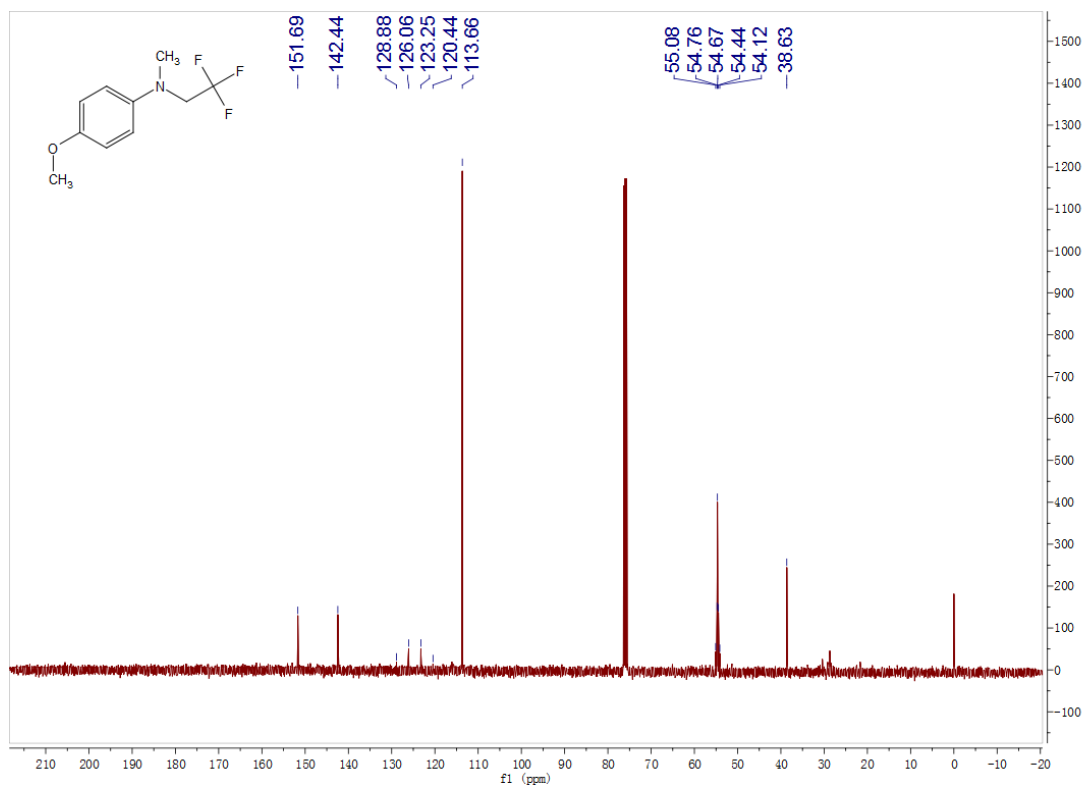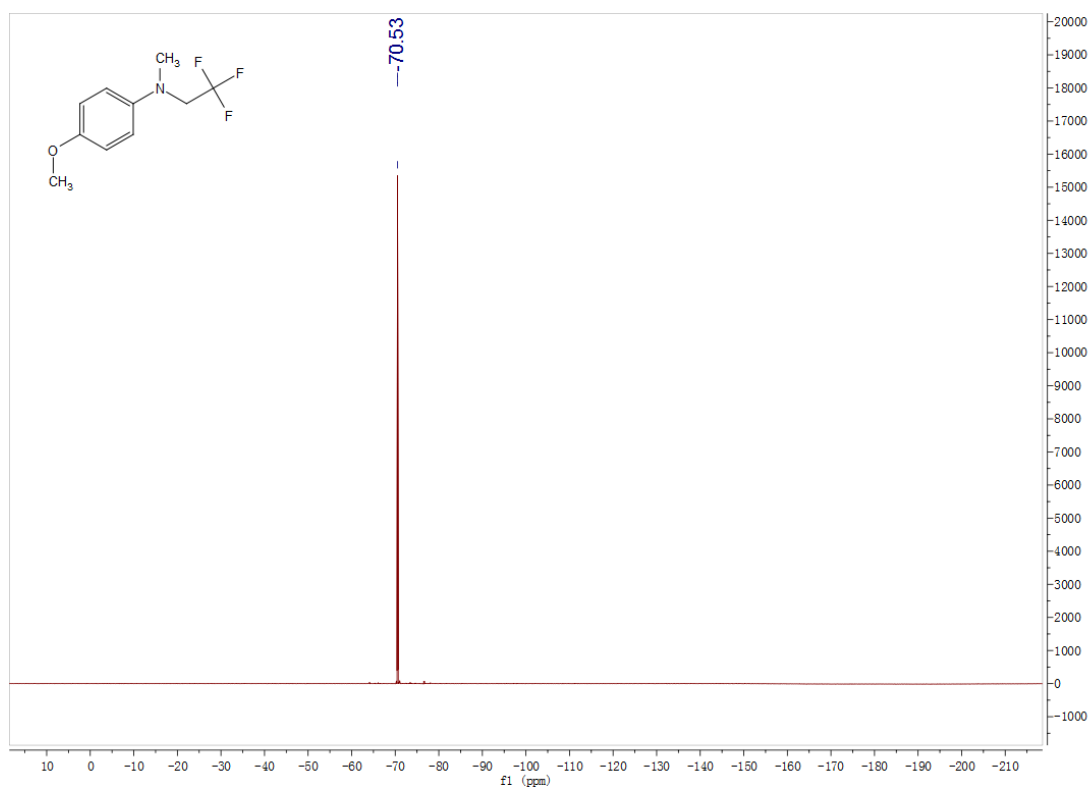

**N,4-dimethyl-N-(2, 2, 2-trifluoroethyl)benzenamine(4c)**, pale yellow liquid, 44.5 mg, 73% yield.  $^1\text{H NMR}$  (400 MHz,  $\text{CDCl}_3$ )  $\delta$  6.99 (d,  $J=7.9$  Hz, 2H), 6.65 (d,  $J=7.9$  Hz, 2H), 3.74 (q,  $J=9.0$  Hz, 2H), 2.94 (s, 3H), 2.19 (s, 3H).  $^{13}\text{C NMR}$  (100 MHz,  $\text{CDCl}_3$ )  $\delta$ =145.6, 128.7, 126.5, 124.6(q,  $J=281.0$  Hz), 112.0, 53.7(q,  $J=32.0$  Hz), 38.2, 19.2.  $^{19}\text{F NMR}$  (377 MHz,  $\text{CDCl}_3$ )  $\delta$  -70.46 (t,  $J=9.0$  Hz). HRMS (EI): calcd for  $\text{C}_{10}\text{H}_{12}\text{F}_3\text{N}$ : 203.0922; found: 203.0918

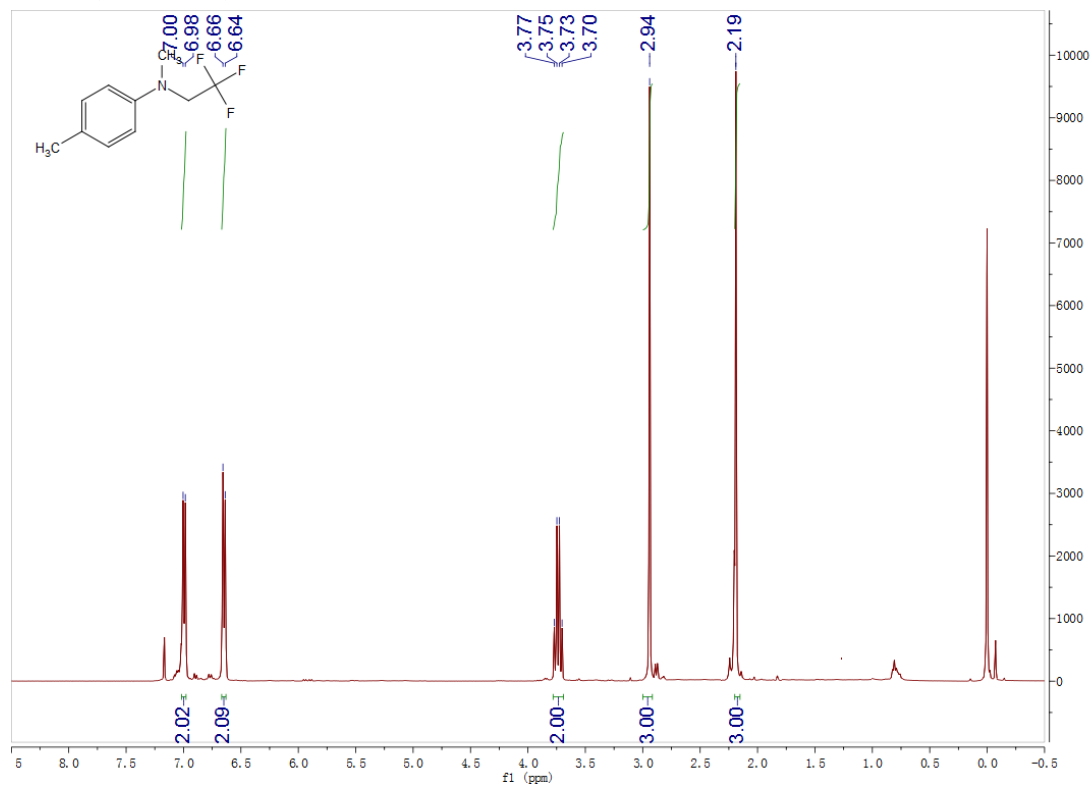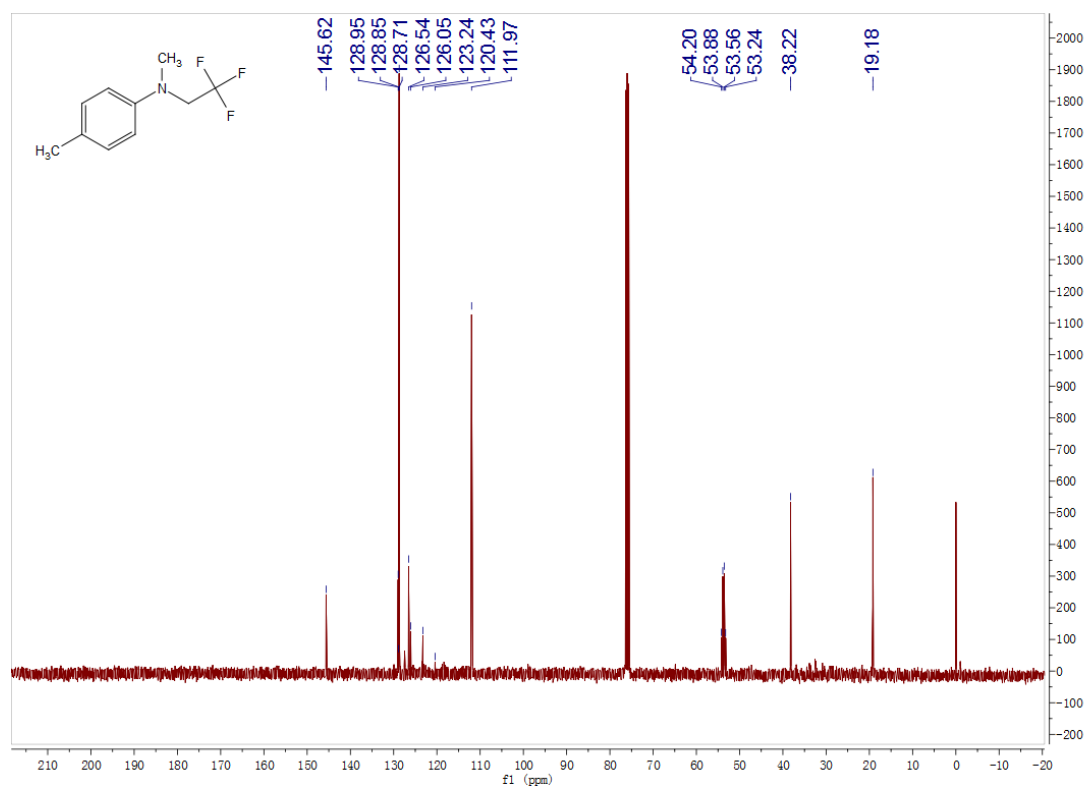

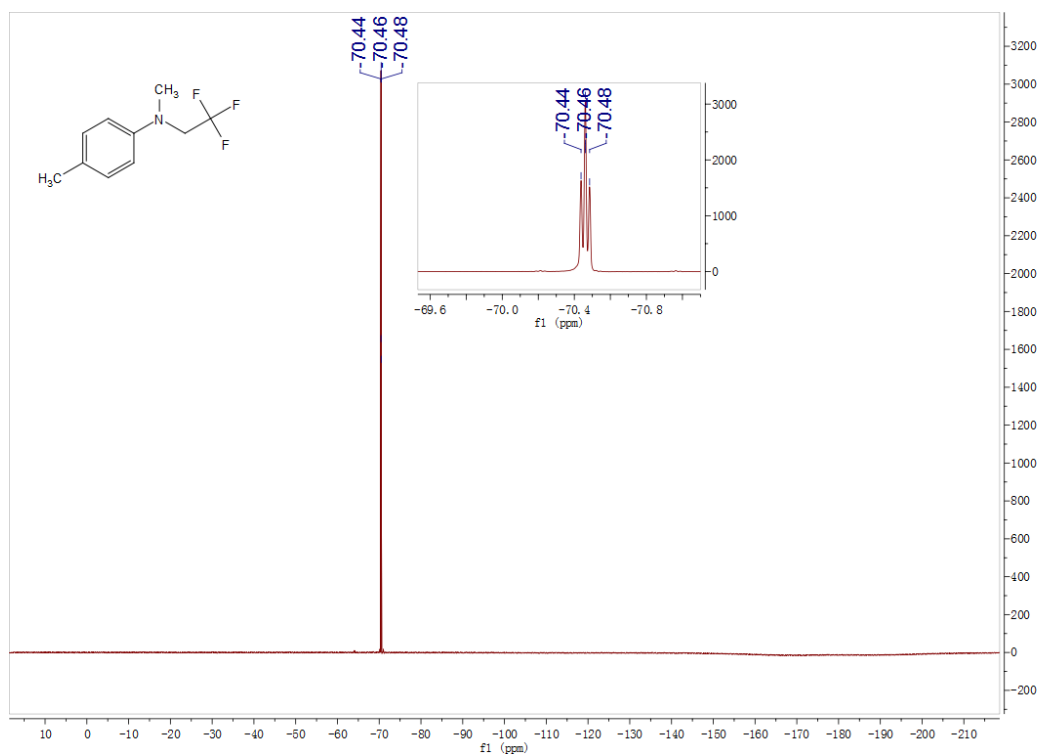

**N,3-dimethyl-N-(2, 2, 2-trifluoroethyl)benzenamine(4d)**, pale yellow liquid, 43.9 mg, 72% yield.  $^1\text{H}$  NMR (400 MHz,  $\text{CDCl}_3$ )  $\delta$  7.07 (t,  $J=8.2$  Hz, 1H), 6.56 (d,  $J=15.7$  Hz, 3H), 3.75 (q,  $J=9.0$  Hz, 2H), 2.95 (s, 3H), 2.25 (s, 3H).  $^{13}\text{C}$  NMR (100 MHz,  $\text{CDCl}_3$ )  $\delta$  147.8, 138.0, 128.1, 124.6(q,  $J=281.0$  Hz), 118.2, 112.5, 109.0, 53.4(q,  $J=32.0$  Hz), 38.1, 20.8.  $^{19}\text{F}$  NMR (377 MHz,  $\text{CDCl}_3$ )  $\delta$  -70.45 (t,  $J=9.0$  Hz). HRMS (EI): calcd for  $\text{C}_{10}\text{H}_{12}\text{F}_3\text{N}$ : 203.0922; found: 203.0926

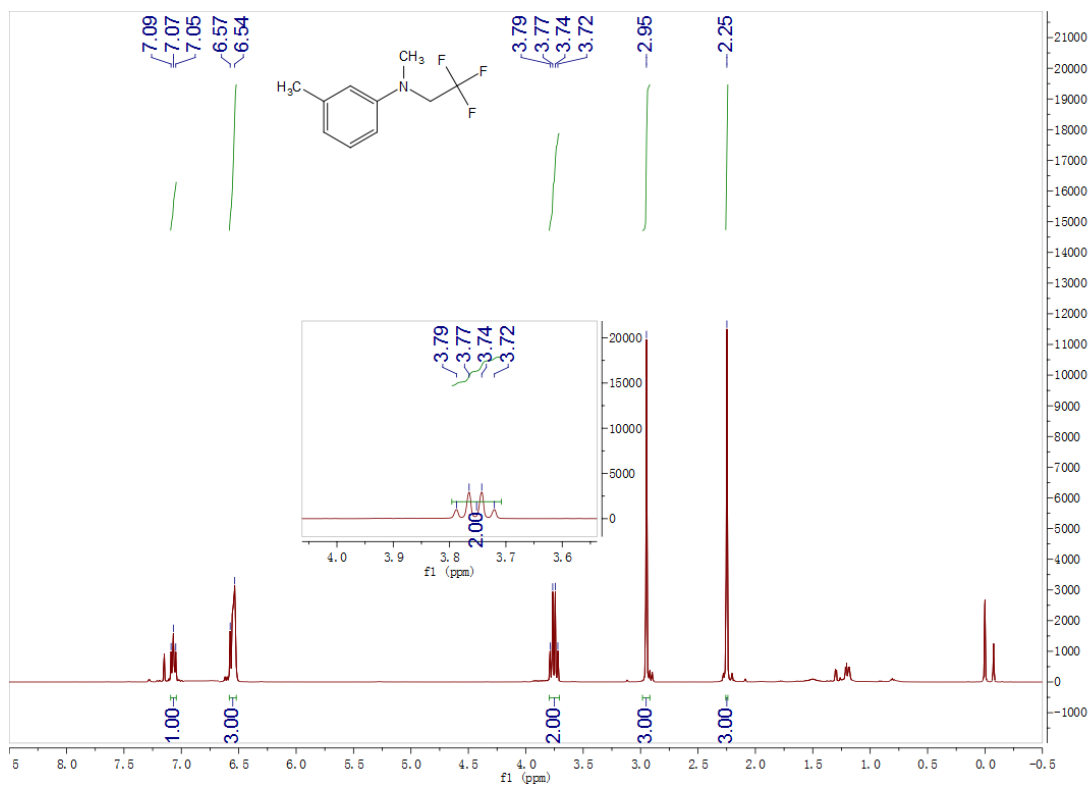

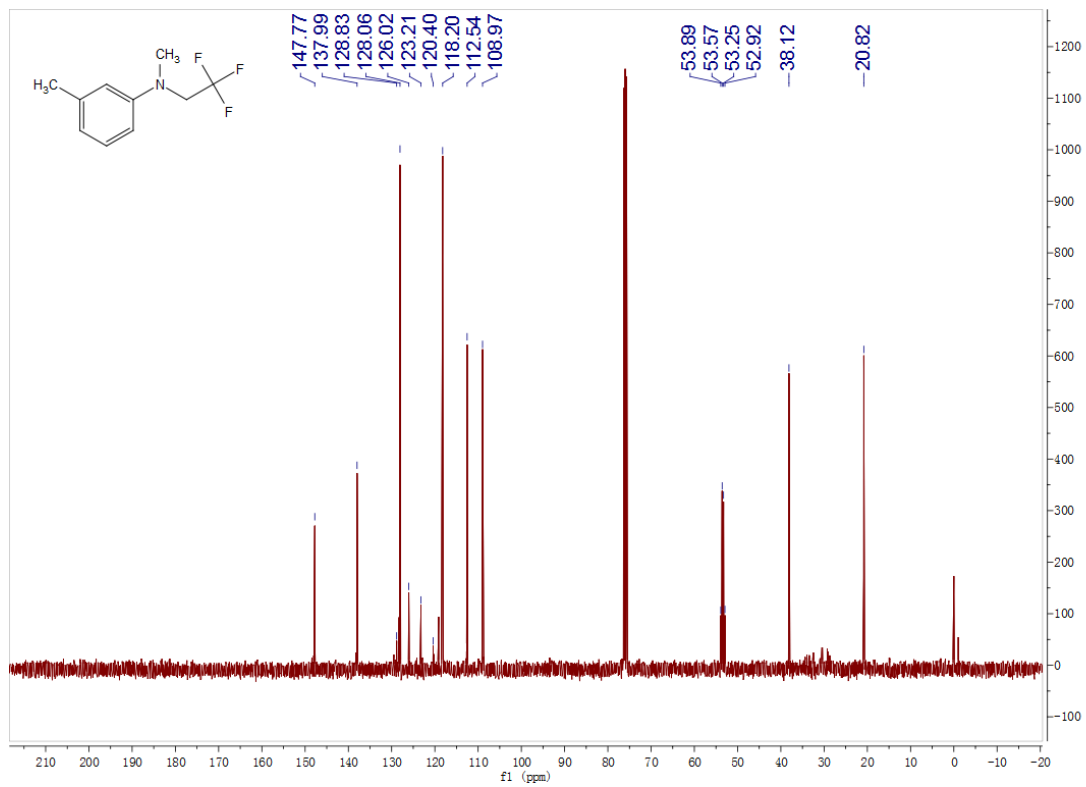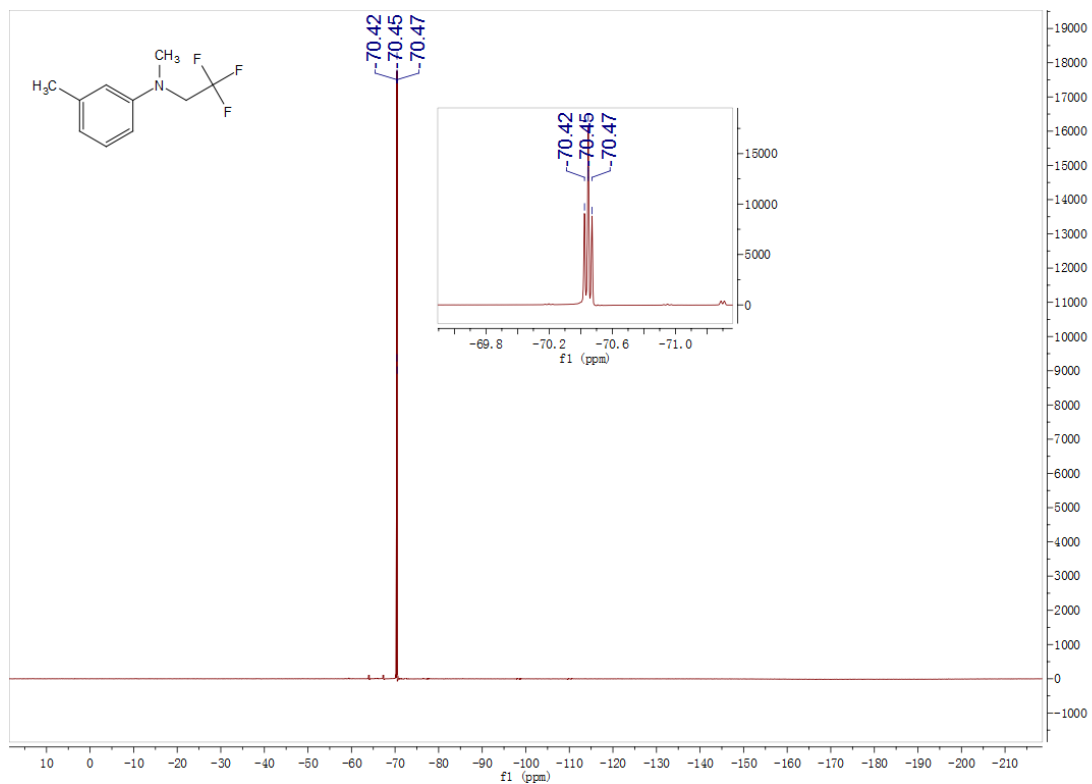

**4-chloro-N-methyl-N-(2, 2, 2-trifluoroethyl)benzenamine(4e)**, pale yellow liquid, 47.0mg, 70% yield.  $^1\text{H}$  NMR (400 MHz,  $\text{CDCl}_3$ )  $\delta$  7.12 (d,  $J=7.9$  Hz, 2H), 6.63 (d,  $J=8.2$  Hz, 2H), 3.74 (q,  $J=8.9$  Hz, 2H), 2.94 (s, 3H).  $^{13}\text{C}$  NMR (100 MHz,  $\text{CDCl}_3$ )  $\delta$  146.2, 128.0, 124.4 (q,  $J=281.0\text{Hz}$ ), 122.2, 112.9, 53.3 (q,  $J=33.0$  Hz), 38.3.  $^{19}\text{F}$  NMR (377 MHz,  $\text{CDCl}_3$ )  $\delta$  -70.42 (t,  $J=8.9$  Hz). HRMS (EI): calcd for  $\text{C}_9\text{H}_9\text{ClF}_3\text{N}$ : 223.0376; found: 223.0378

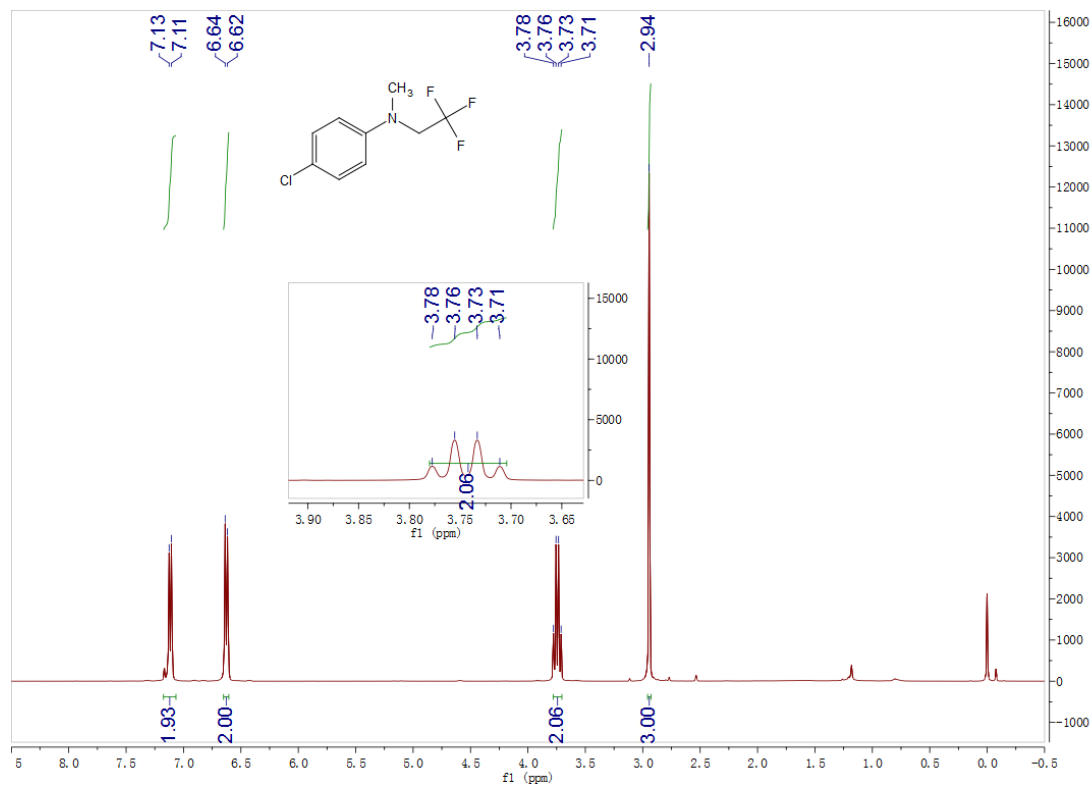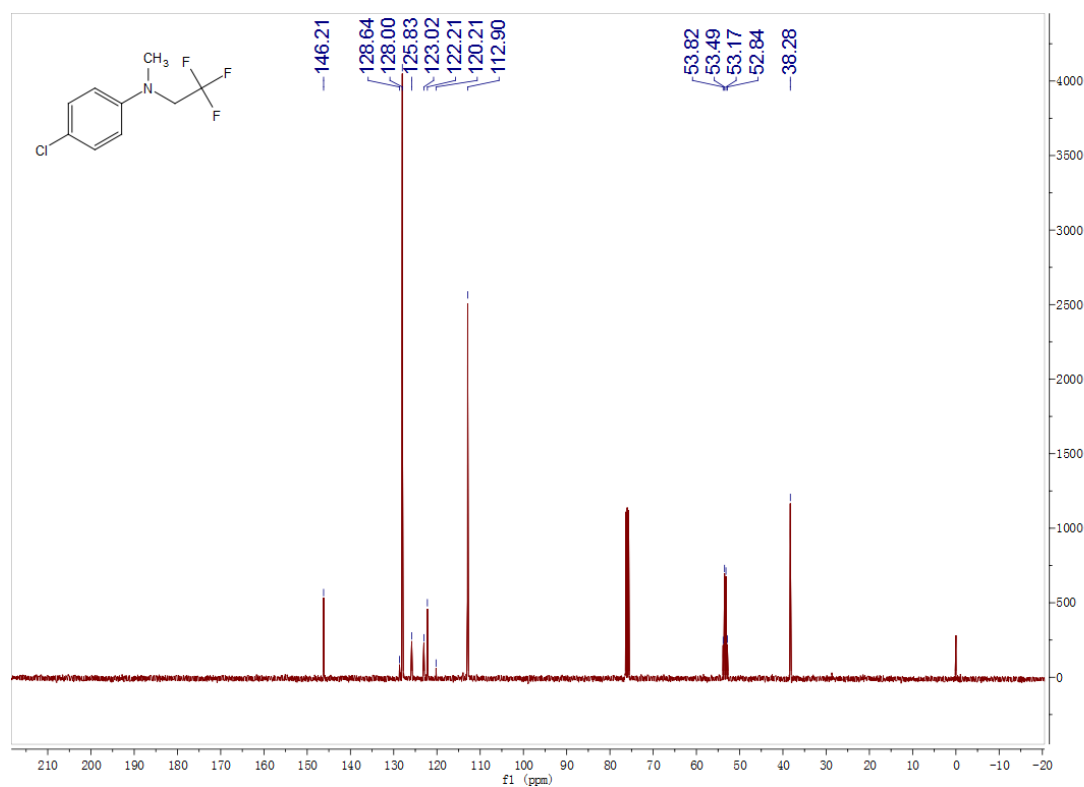

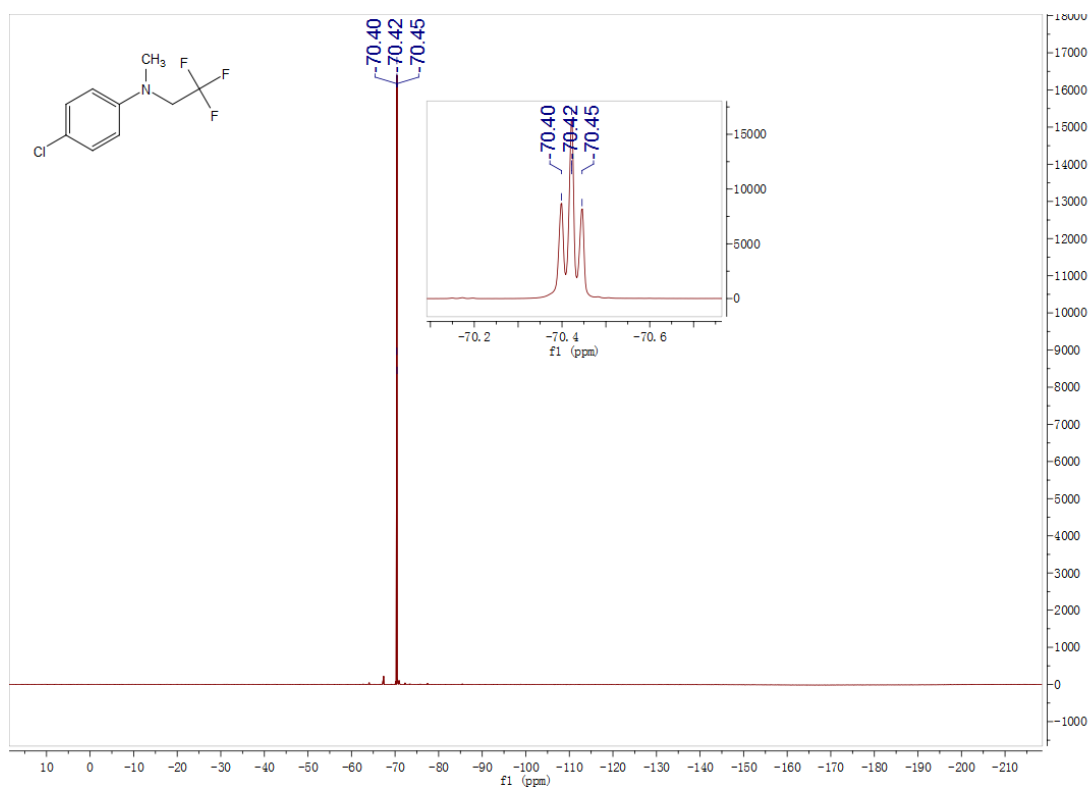

**4-bromo-N-methyl-N-(2,2,2-trifluoroethyl)benzenamine(4f)**, pale yellow liquid, 58.7mg, 73% yield.  $^1\text{H}$  NMR (400 MHz,  $\text{CDCl}_3$ )  $\delta$  7.25 (d,  $J=8.2$  Hz, 2H), 6.58 (d,  $J=8.3$  Hz, 2H), 3.75 (q,  $J=8.7$  Hz, 2H), 2.94 (s, 3H).  $^{13}\text{C}$  NMR (100 MHz,  $\text{CDCl}_3$ )  $\delta$  147.6, 131.9, 125.4 (q,  $J=281.0$ Hz), 114.4, 110.4, 54.2 (q,  $J=32.0$  Hz), 39.3.  $^{19}\text{F}$  NMR (377 MHz,  $\text{CDCl}_3$ )  $\delta$  -70.37 (t,  $J=8.8$  Hz). HRMS (EI): calcd for  $\text{C}_9\text{H}_9\text{BrF}_3\text{N}$ : 266.9870; found: 266.9866

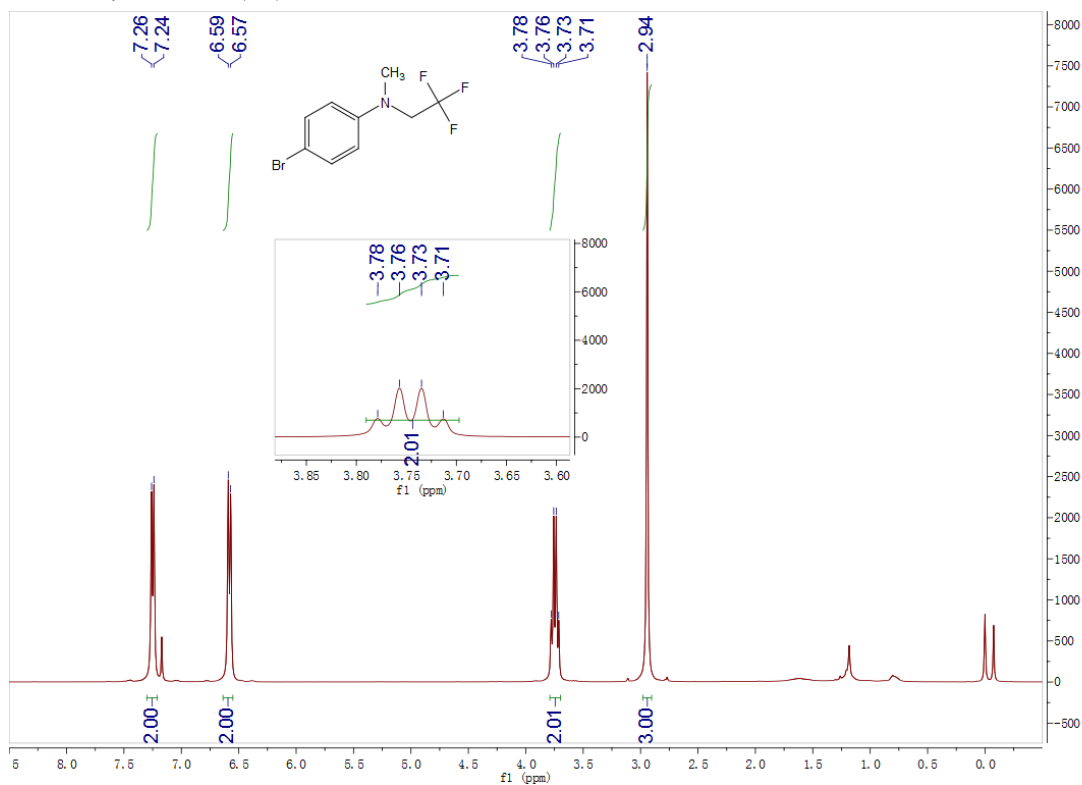

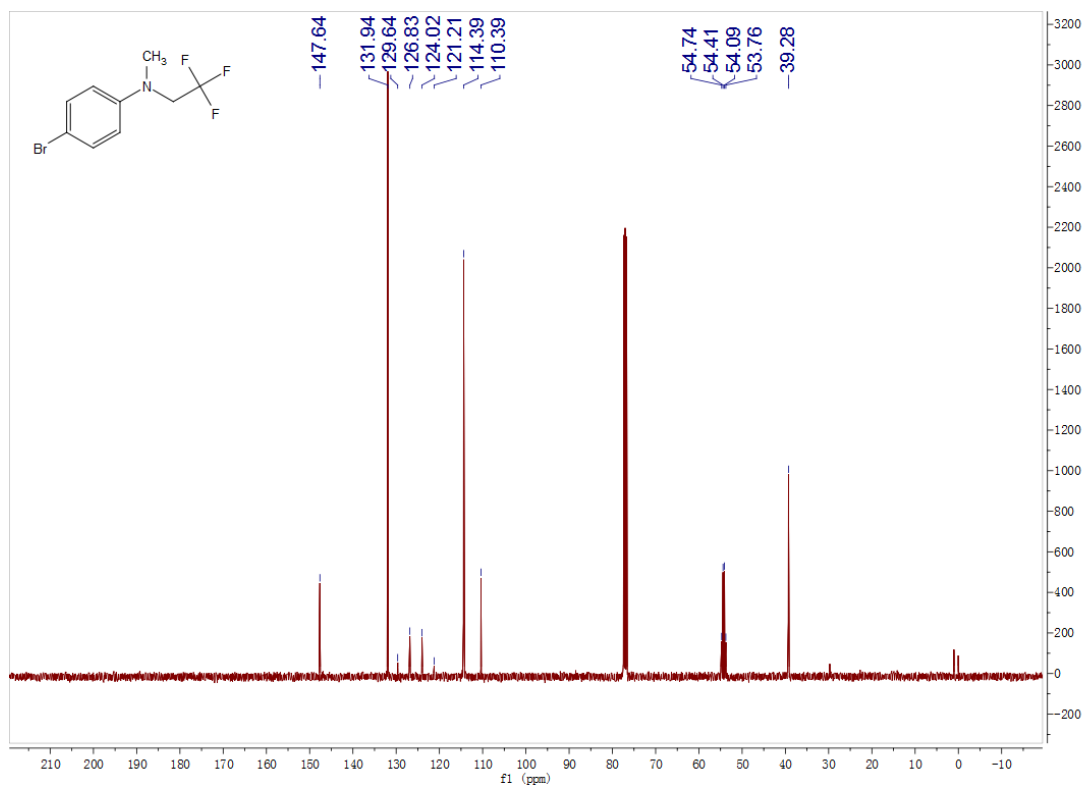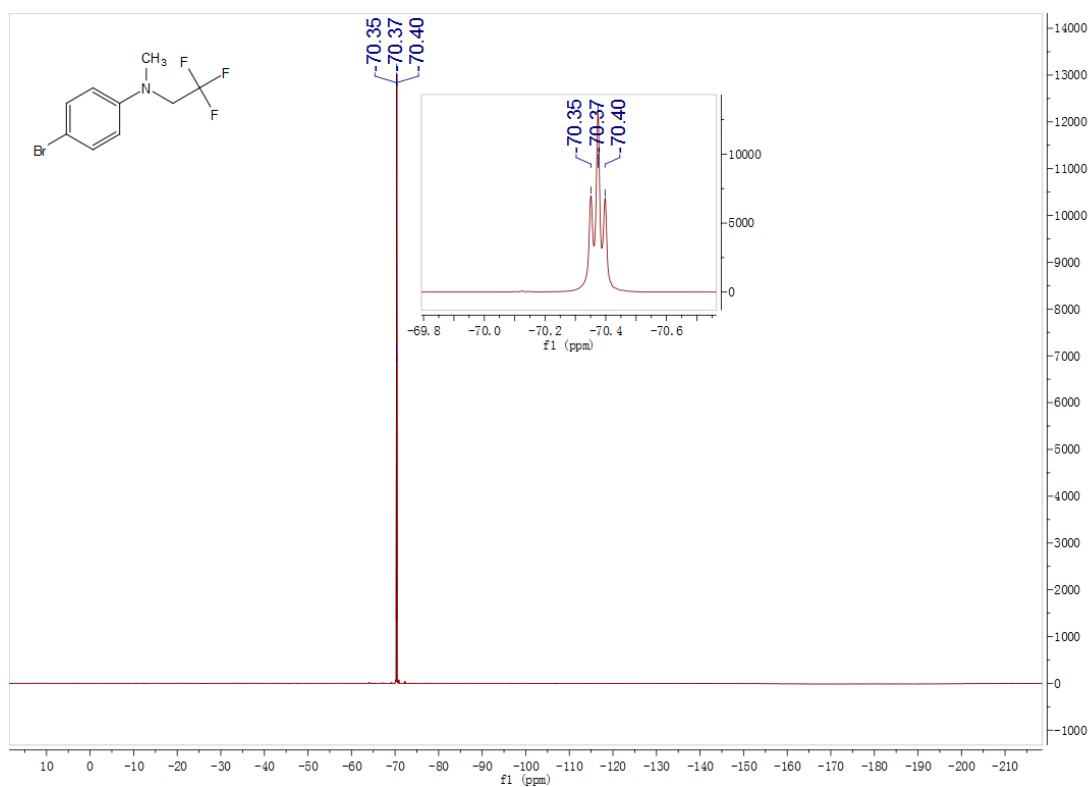



**3-chloro-N-methyl-N-(2, 2, 2-trifluoroethyl)benzenamine(4g)**, pale yellow liquid, 48.3mg, 72% yield.  $^1\text{H}$  NMR (400 MHz,  $\text{CDCl}_3$ )  $\delta$  7.08 (t,  $J=8.1$  Hz, 1H), 6.70 (d,  $J=9.0$  Hz, 2H), 6.59 (d,  $J=8.5$  Hz, 2H), 2.96 (s, 3H).  $^{13}\text{C}$  NMR (100 MHz,  $\text{CDCl}_3$ )  $\delta$  148.7, 134.2, 129.1, 124.3(q,  $J=281.0$  Hz), 117.2, 111.7, 109.8, 53.0(q,  $J=33.0$  Hz), 38.2.  $^{19}\text{F}$  NMR (377 MHz,  $\text{CDCl}_3$ )  $\delta$  -70.39 (t,  $J=8.8$  Hz). HRMS (EI): calcd for  $\text{C}_9\text{H}_9\text{ClF}_3\text{N}$ : 223.0376; found: 223.0373

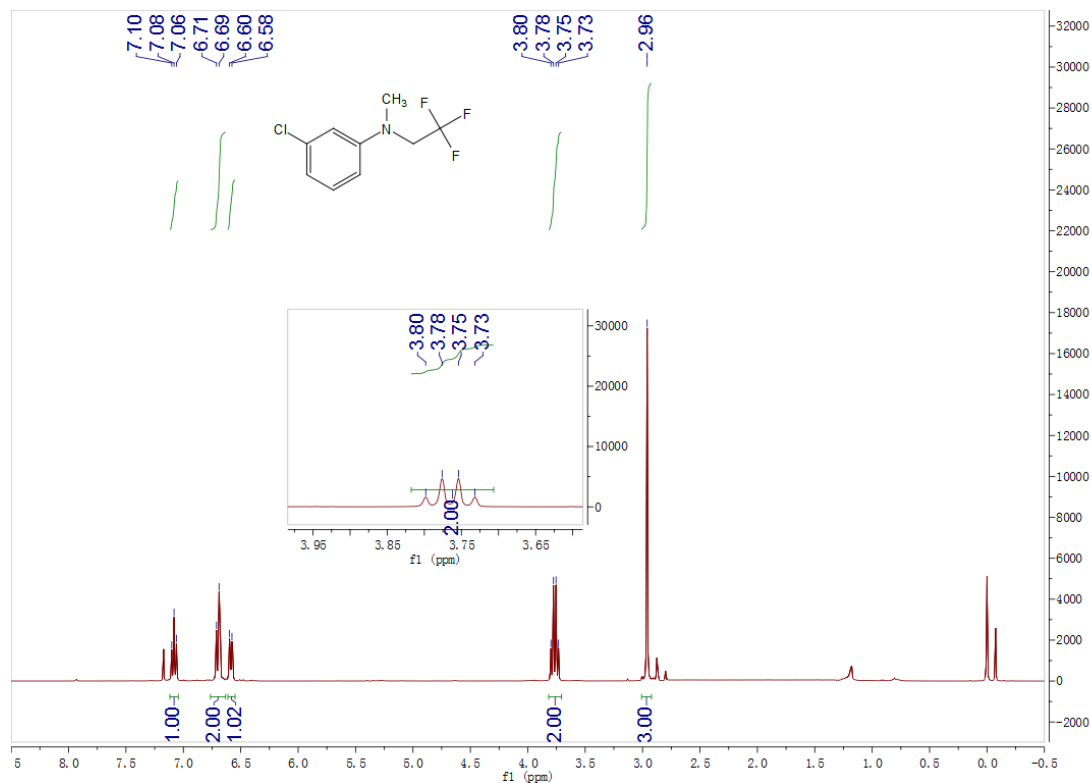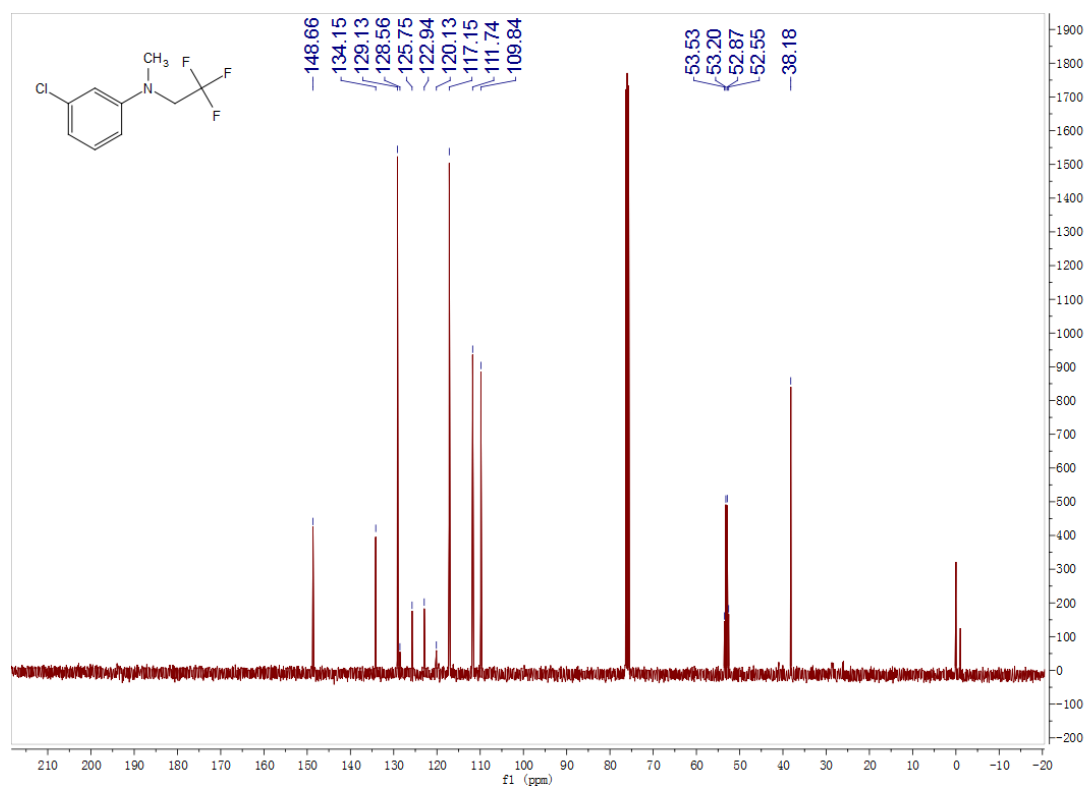

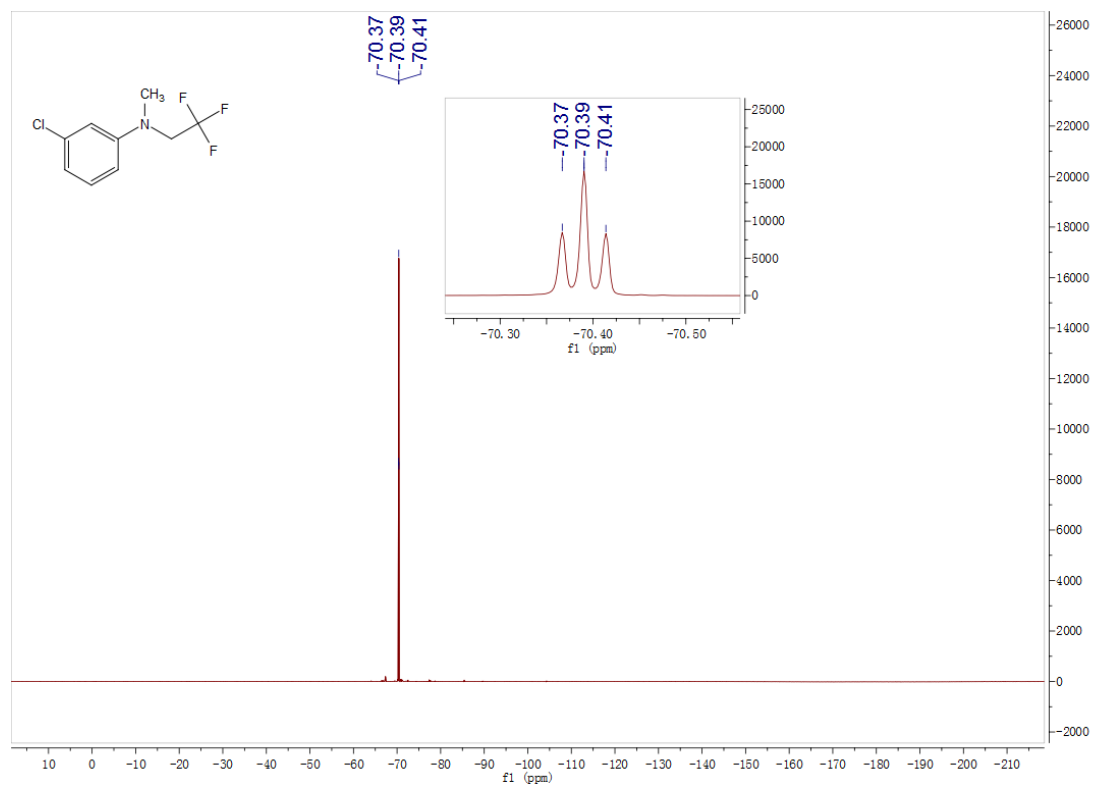

Supplement: d1ra03379d1.pdf [file d1ra03379d1.pdf]
